# Supplementary material for: Analysis of metabolic differences in Tibetan medicinal plant Phlomoides rotata leaves in different habitats based on non-targeted metabolomics
Source: Frontiers journal article supplement (doi:10.3389/fpls.2025.1503218), 2025-04-08
Supplement: Table_1.xls [file Table_1.xls]

## Sheet: 代谢物信息总览表
Metabolite	KEGG Pathway Description	Adducts	Formula	Retention time	Mode	HMDB Class	M/Z	Mass Error
Valerosidatum	-	M+H, M+NH4, M+K, M+ACN+H, 2M+H, 2M+NH4, 2M+Na, M+H-2H2O, M+H+Na	C21H34O11	4.0048	pos	-	925.425	-3.28653
Secogalioside	-	M+H-H2O, M+H, M+NH4, 2M+H, 2M+Na, M+H-2H2O	C17H24O12	1.6029	pos	-	403.122	-2.57951
Dihydroactinidiolide	-	M+NH4, M+ACN+H, M+ACN+Na, M+Na, M+H, M+H-H2O	C11H16O2	4.921	pos	Benzofurans	181.122	-2.4665
PC(16:0/0:0)[U]	-	M+H, 2M+H, 2M+Na, M+K, M+Na, M+H-H2O	C24H50NO7P	8.2666	pos	-	496.338	-3.35327
PE(16:0/0:0)	-	M+H, 2M+Na, 2M+H, M+2Na-H, M+Na, M+H-H2O	C21H44NO7P	8.387	pos	-	454.291	-3.21337
13(S)-HOTrE	alpha-Linolenic acid metabolism	M+H-H2O, 2M+Na, M+K, M+H, M+Na, M+H-2H2O	C18H30O3	7.6108	pos	-	317.208	-2.54033
LysoPE(18:3(9Z,12Z,15Z)/0:0)	-	M+H, 2M+Na, 2M+H, M+2Na-H, M+Na, M+H-H2O	C23H42NO7P	7.5355	pos	Glycerophospholipids	476.276	-2.88967
Autumnolide	-	M+H-2H2O, M+H-H2O, M+H, M+ACN+H, 2M+H	C15H20O5	3.347	pos	-	245.117	-2.52036
6-Acetamido-3-oxohexanoate	-	M+H-2H2O, M+H-H2O, M+ACN+H, M+H	C8H13NO4	0.6533	pos	-	188.091	-1.73071
3-O-fucopyranosyl-2-acetamido-2-deoxyglucopyranose	-	M+H-2H2O, M+CH3OH+H, M+Na, M+H-H2O	C14H25NO10	0.6533	pos	Fatty Acyls	332.133	-2.21277
Dihydrocoumarin	-	M+NH4, M+ACN+H, M+H, M+H-H2O	C9H8O2	1.4391	pos	-	166.086	-1.83323
6-O-Oleuropeoylsucrose	-	M+Na, M+K, M+NH4, M+H	C22H36O13	2.3032	pos	Saccharolipids	531.204	-1.66533
Lactupicrin	-	M+NH4, M+Na, M+K, M+H-H2O	C23H22O7	1.9823	pos	Phenols	428.174	8.2834
N-Acetylgalactosaminyl lactose	-	M+H, M+Na, M+ACN+Na, M+H-H2O	C20H35NO16	1.863	pos	Organooxygen compounds	546.207	7.41721
Isoshinanolone	-	M+H-H2O, 2M+H, 2M+ACN+Na, M+H-2H2O	C11H12O3	1.8256	pos	-	448.181	-1.54565
Vanilpyruvic acid	-	M+H-H2O, M+CH3OH+H, M+H, M+H-2H2O	C10H10O5	1.6178	pos	Benzene and substituted derivatives	193.049	-2.18073
Benzoylacetic acid	-	M+H, M+CH3OH+H, M+H-H2O, M+H-2H2O	C9H8O3	1.6178	pos	-	165.054	-2.40847
Prephenic acid	Metabolic pathways;Phenylalanine, tyrosine and tryptophan biosynthesis;Biosynthesis of secondary metabolites;Biosynthesis of amino acids	M+H-H2O, M+CH3OH+H, M+H, M+H-2H2O	C10H10O6	1.6029	pos	-	209.044	-2.54324
Pantothenic Acid	Metabolic pathways;Biosynthesis of secondary metabolites;Pantothenate and CoA biosynthesis;beta-Alanine metabolism	M+H, M+Na, M+H-H2O, M+H-2H2O	C9H17NO5	1.5284	pos	Organooxygen compounds	220.117	-2.67013
Pantoyllactone glucoside	-	M+H-2H2O, M+K, 2M+Na, M+Na	C12H20O8	1.3645	pos	Fatty Acyls	315.104	-2.35942
Phenylethyl primeveroside	-	M+Na, M+K, M+NH4, M+H	C19H28O10	2.5941	pos	Organooxygen compounds	434.201	-2.70679
1-O-E-Cinnamoyl-(6-arabinosylglucose)	-	M+H, M+Na, M+H-H2O, M+H-2H2O	C20H26O11	2.7952	pos	Cinnamic acids and derivatives	443.154	-2.77124
Deoxyanisatin	-	M+H-2H2O, M+H, M+H-H2O, M+ACN+H	C15H20O7	3.6159	pos	-	277.106	-2.36117
2-decenal	-	M+H-H2O, 2M+H, M+H, M+Na	C10H18O	3.6458	pos	Organooxygen compounds	137.132	-2.08526
Moringyne	-	M+H-2H2O, M+H-H2O, M+H, M+ACN+H	C15H20O7	3.7355	pos	Organooxygen compounds	277.106	-2.16882
Hymenoxone	-	M+H-H2O, M+H, 2M+H, M+H-2H2O	C15H22O5	4.0048	pos	-	265.143	-2.86367
Kamahine C	-	M+H-H2O, M+NH4, M+Na, M+H-2H2O	C14H20O5	4.1021	pos	Organooxygen compounds	233.117	-2.61466
(±)13-HpODE	-	M+H-H2O, M+NH4, M+Na, M+H	C18H32O4	6.5557	pos	-	335.218	-2.51015
1-Linoleoylglycerophosphocholine	-	M+H, 2M+H, M+Na, M+K	C26H50NO7P	7.8973	pos	Glycerophospholipids	520.338	-2.78019
KAPA	Metabolic pathways;Biotin metabolism	M+H, M+Na, M+H-H2O, M+H-2H2O	C9H17NO3	8.2966	pos	-	188.128	-2.20868
1alpha,25-dihydroxy-11alpha-[(1R)-oxiranyl]vitamin D3	-	M+H, 2M+K, M+Na, M+H-H2O	C29H46O4	7.8973	pos	-	459.346	-2.72017
Linoleamide	-	M+H, 2M+H, M+Na, M+H-H2O	C18H33NO	8.6866	pos	Fatty Acyls	280.263	-2.90851
Garcinone D	-	M+Na, 2M+Na, M+K, M+NH4	C24H28O7	7.528	pos	Benzopyrans	451.172	-2.58109
LysoPC(18:3(9Z,12Z,15Z))	-	M+H, 2M+H, M+K, M+Na	C26H48NO7P	7.4301	pos	Glycerophospholipids	518.323	-2.97949
2beta,9xi-Dihydroxy-8-oxo-1(10),4,11(13)-germacratrien-12,6alpha-olide	-	M+H-H2O, M+H, M+ACN+Na, 2M+H	C15H18O5	4.0347	pos	Prenol lipids	557.257	-2.5723
DG(18:1(9Z)/18:4(6Z,9Z,12Z,15Z)/0:0)	-	M+NH4, M+K, M+Na, M+H	C39H66O5	10.7414	pos	Fatty Acyls	637.479	-2.35514
7,8 Dihydrokawain	-	M+H-H2O, M+H, 2M+ACN+Na, M+H-2H2O	C14H16O3	3.4142	pos	-	215.106	-2.29129
7-hydroxy-6-(3-oxobut-1-en-1-yl)-2H-chromen-2-one	-	M+CH3OH+H, 2M+Na, 2M+ACN+H, 2M+K	C13H10O4	2.6688	pos	Coumarins and derivatives	263.091	-2.94645
Imidazol-4-one-5-propionic acid	Metabolic pathways;Histidine metabolism	M+H-2H2O, M+H-H2O, 2M+3H2O+2H	C6H8N2O3	0.9152	pos	-	139.05	-0.295514
Levulinic acid	-	M+H, M+H-H2O, M+H-2H2O	C5H8O3	0.9077	pos	Keto acids and derivatives	117.055	-0.0615493
3-Methoxy-4,5-methylenedioxybenzoic acid	-	M+H-H2O, M+H, M+H-2H2O	C9H8O5	1.3047	pos	Benzene and substituted derivatives	179.033	-2.27556
Glaucarubolone	-	M+H-2H2O, M+H, M+H-H2O	C20H26O8	1.6475	pos	-	359.148	-2.77637
Trans-3-Hydroxycotinine glucuronide	-	M+H, M+CH3OH+H, M+H-H2O	C16H20N2O8	1.8331	pos	Organooxygen compounds	401.155	-3.21894
(3,4,5,6-tetrahydroxyoxan-2-yl)methyl 4-hydroxybenzoate	-	M+Na, M+K, 2M+K	C13H16O8	1.9004	pos	Benzene and substituted derivatives	323.073	-2.77066
3-Isochromanone	-	M+H, M+CH3OH+H, M+H-H2O	C9H8O2	2.1766	pos	-	149.059	-2.28361
Sinapinic acid	Metabolic pathways;Phenylpropanoid biosynthesis;Biosynthesis of secondary metabolites	M+NH4, M+CH3OH+H, 2M+NH4	C11H12O5	1.8929	pos	-	257.101	-2.54894
Oleoside 11-methyl ester	-	M+ACN+H, M+2Na-H, M+NH4	C17H24O11	1.8256	pos	Prenol lipids	422.164	-2.63564
Isoeugenitin	-	M+H-H2O, 2M+K, M+H-2H2O	C12H12O4	1.8256	pos	Benzopyrans	203.07	-2.23432
1-O-Feruloyl-beta-D-glucose	-	M+H-H2O, M+H, M+H-2H2O	C16H20O9	1.7888	pos	-	339.107	-1.84668
N-Phenylacetylglutamic acid	-	M+H, 2M+ACN+Na, M+H-H2O	C13H15NO5	1.7888	pos	Carboxylic acids and derivatives	266.102	-1.15588
Di-2-furanylmethane	-	M+H, M+CH3OH+H, M+H-H2O	C9H8O2	1.7888	pos	Heteroaromatic compounds	149.059	-1.81748
Furaneol 4-(6-malonylglucoside)	-	M+Na, M+K, M+H	C15H20O11	1.6998	pos	Organooxygen compounds	399.089	-2.30576
Mytilin A	-	M+H-H2O, M+H, M+H-2H2O	C13H20N2O8	1.6475	pos	Carboxylic acids and derivatives	297.111	9.51932
Acetaminophen glucuronide	-	M+H-2H2O, M+CH3OH+H, M+H	C14H17NO8	1.5806	pos	Organooxygen compounds	360.128	-0.298305
2-(3-CARBOXYPROPIONYL)-6-HYDROXY-CYCLOHEXA-2,4-DIENE CARBOXYLIC ACID	-	M+H-H2O, M+H, M+H-2H2O	C11H12O6	1.6029	pos	-	241.07	-2.75394
N-ACETYLPROLINE	-	M+H, 2M+H, M+Na	C7H11NO3	1.5731	pos	Carboxylic acids and derivatives	158.081	-2.29641
Thermophillin	-	M+H-2H2O, M+H, M+H-H2O	C8H8O4	1.5432	pos	Organooxygen compounds	151.039	-1.38436
Glycylprolylhydroxyproline	-	M+Na, M+2Na-H, M+H	C12H19N3O5	1.3421	pos	Carboxylic acids and derivatives	286.139	-2.35883
L-Threonine	Metabolic pathways;Biosynthesis of secondary metabolites;Aminoacyl-tRNA biosynthesis;Valine, leucine and isoleucine biosynthesis;ABC transporters;Porphyrin and chlorophyll metabolism;Biosynthesis of amino acids;Glycine, serine and threonine metabolism;Monobactam biosynthesis	M+H-2H2O, M+H-H2O, M+H	C4H9NO3	0.5801	pos	Carboxylic acids and derivatives	84.0447	2.59934
(R)-(+)-2-Pyrrolidone-5-carboxylic acid	-	M+H, M+NH4, M+H-H2O	C5H7NO3	0.5801	pos	-	130.05	-1.36416
2-Aminoheptanedioic acid	-	M+H, M+K, M+Na	C7H13NO4	1.0273	pos	Carboxylic acids and derivatives	176.091	-1.96153
Pinobanksin 5-[galactosyl-(1->4)-glucoside]	Flavonoid biosynthesis	M+H-2H2O, M+H-H2O, M+H	C27H32O15	1.9674	pos	Flavonoids	597.18	-2.42646
Orientin 7,3'-dimethyl ether	-	M+H-H2O, M+H, M+H-2H2O	C23H24O11	1.9674	pos	Flavonoids	459.127	-2.5396
Flavin Mononucleotide	Metabolic pathways;Biosynthesis of secondary metabolites;Oxidative phosphorylation;Riboflavin metabolism	M+Na, M+K, M+NH4	C17H21N4O9P	1.9972	pos	Flavin nucleotides	479.091	-5.17596
Triethyl citrate	-	M+Na, 2M+K, M+H-2H2O	C12H20O7	2.0272	pos	Carboxylic acids and derivatives	299.11	-2.25121
4-METHYLDAPHNETIN	-	M+H, M+CH3OH+H, M+H-H2O	C10H8O4	2.1095	pos	-	175.039	-2.25262
P-Anisaldehyde	-	M+H, M+CH3OH+H, M+H-H2O	C8H8O2	2.1095	pos	-	137.059	-2.18895
6''-O-Acetylgenistin	-	M+H-H2O, M+H, M+H-2H2O	C23H22O11	2.2362	pos	Isoflavonoids	475.122	-2.20156
Rhamnazin 3-sophoroside	-	M+NH4, M+K, M+Na	C29H34O17	2.2362	pos	Flavonoids	672.212	-2.74089
(R)-(-)-Mellein	-	M+H, M+CH3OH+H, M+H-H2O	C10H10O3	2.4377	pos	-	179.07	-2.53229
(3,4,5,6-tetrahydroxyoxan-2-yl)methyl 3-(4-hydroxy-3-methoxyphenyl)prop-2-enoate	-	M+NH4, M+Na, M+H-2H2O	C16H20O9	2.5868	pos	Cinnamic acids and derivatives	374.143	-3.58684
5-benzyloxolan-2-one	-	M+H-2H2O, 2M+ACN+H, M+H-H2O	C11H12O2	2.624	pos	Lactones	159.08	-1.58095
Linalool oxide D 3-[apiosyl-(1->6)-glucoside]	-	M+H, M+NH4, M+Na	C21H36O11	2.7061	pos	Organooxygen compounds	482.259	0.824281
Aspergillomarasmine A	-	M+NH4, M+ACN+H, 2M+ACN+H	C10H17N3O8	2.84	pos	Carboxylic acids and derivatives	325.138	9.56374
(E)-2',4,4'-Trihydroxy-3-prenylchalcone	-	M+H, 2M+H, M+2H	C20H20O4	2.9742	pos	Linear 1,3-diarylpropanoids	325.142	-3.06001
2''-Methoxy-(S)-oleuropein	-	M+H-H2O, M+CH3OH+H, M+H-2H2O	C26H34O14	3.2576	pos	Prenol lipids	553.19	-3.19828
3-Hydroxy-4-butanolide	-	M+H-2H2O, M+H, M+H-H2O	C10H16O8	3.4665	pos	Organooxygen compounds	229.07	-2.01626
(5R,6S)-5,6-Epoxy-7-megastigmen-9-one	-	M+H-H2O, M+H, M+H-2H2O	C13H20O2	3.4665	pos	Oxepanes	209.153	-2.60433
3,4,5-trihydroxy-6-{4-[(1E)-3-oxopent-1-en-1-yl]phenoxy}oxane-2-carboxylic acid	-	M+H-H2O, M+ACN+H, M+H	C17H20O8	3.5412	pos	Organooxygen compounds	394.146	-2.50679
5-O-Methylvisamminol	-	M+H-H2O, M+H, M+H-2H2O	C16H18O5	3.9227	pos	-	273.111	-2.75177
Cassiaside C	-	M+H, M+NH4, M+Na	C27H32O15	4.1395	pos	Prenol lipids	597.18	-2.70235
Beta-D-Glucopyranosyl-11-hydroxyjasmonic acid	-	M+H, M+NH4, M+Na	C18H28O9	4.2445	pos	Fatty Acyls	411.162	-2.03629
Lucidenic acid C	-	M+H, M+CH3OH+H, M+H-H2O	C27H40O7	4.4922	pos	Prenol lipids	477.283	-2.56074
Androstenedione	Metabolic pathways	M+H-H2O, M+H, M+H-2H2O	C19H26O2	4.6808	pos	Steroids and steroid derivatives	269.189	-2.65018
3-hydroxy-3-[4-hydroxy-3-(3-methylbut-2-en-1-yl)phenyl]propanoic acid	-	M+H-2H2O, M+H-H2O, M+H	C14H18O4	4.7032	pos	Phenylpropanoic acids	215.106	-1.97567
Galactosylhydroxylysine	-	M+H, M+2Na-H, M+Na	C12H24N2O8	4.6206	pos	Carboxylic acids and derivatives	347.148	3.01553
Tricin 7-neohesperidoside	-	M+NH4, M+Na, M+H	C29H34O16	4.8081	pos	Flavonoids	661.172	-1.6025
Ouabain	-	M+H-2H2O, M+Na, M+NH4	C29H44O12	4.9135	pos	Benzene and substituted derivatives	607.27	-2.30649
Capsianoside V	-	M+H-H2O, M+Na, M+NH4	C26H42O10	4.9585	pos	Prenol lipids	497.273	-3.37786
Lucidenic acid G	-	M+H-H2O, M+H, M+CH3OH+H	C27H40O7	5.4244	pos	Prenol lipids	477.284	-2.65599
(17beta)-17-Hydroxyestr-5(10)-en-3-one	-	M+H-H2O, M+H, M+H-2H2O	C18H26O2	5.4169	pos	-	275.2	-2.47506
Plantaricin BN	-	M+H-H2O, M+K, M+Na	C24H36O10	5.6276	pos	Carboxylic acids and derivatives	507.219	-2.46274
Ophiopogonanone A	-	M+H, 2M+Na, M+Na	C18H16O6	5.8691	pos	-	329.101	-3.16689
ESTRONE ACETATE	-	M+H-H2O, M+Na, M+H	C20H24O3	5.9671	pos	-	295.169	-2.29756
9S-hydroxy-12R,13S-epoxy-10E,15Z-octadecadienoic acid	-	M+H, 2M+K, M+K	C18H30O4	5.9898	pos	-	311.221	-3.33157
2,5-Dimethylbenzaldehyde	-	M+H, M+ACN+H, M+H-H2O	C9H10O	6.3146	pos	-	135.08	-2.43456
Decylubiquinone	-	M+H, M+Na, M+H-H2O	C19H30O4	6.6766	pos	-	323.221	-2.773
Alpha-Amylcinnamaldehyde	-	M+H-H2O, M+H, M+CH3OH+H	C14H18O	6.8195	pos	-	203.143	-2.22799
Alpha-Calacorene	-	M+H, M+Na, M+CH3OH+H	C15H20	6.8195	pos	-	201.163	-2.66921
Cortol	-	M+H-2H2O, M+H, M+Na	C21H36O5	7.1142	pos	Steroids and steroid derivatives	391.244	-2.63355
Cortolone	-	M+H-H2O, M+H, M+Na	C21H34O5	6.7971	pos	Steroids and steroid derivatives	389.229	-2.58037
12-OPDA	Metabolic pathways;alpha-Linolenic acid metabolism;Biosynthesis of secondary metabolites	M+H, M+Na, M+H-H2O	C18H28O3	6.7971	pos	-	293.21	-2.93133
17beta-Hydroxy-2alpha-(hydroxymethyl)-5alpha-androstan-3-one	-	M+H-H2O, M+Na, M+H	C20H32O3	7.9199	pos	-	343.224	-2.08502
Apo-10'-violaxanthal	-	M+H-H2O, M+H, M+H-2H2O	C27H36O3	7.9275	pos	Prenol lipids	409.273	-2.58535
PS(18:3(9Z,12Z,15Z)/20:2(11Z,14Z))	-	M+H-H2O, M+Na, M+H	C44H76NO10P	8.1389	pos	Glycerophospholipids	810.526	-2.92023
2?,17-dimethyl-19-nortestosterone	-	M+H-H2O, M+H, M+H-2H2O	C20H30O2	7.7919	pos	-	303.231	-2.74324
Caffeoyl C1-glucuronide	-	M+H-H2O, M+H, M+H-2H2O	C15H16O10	4.9734	pos	Cinnamic acids and derivatives	357.081	-2.55315
(+)-3-Carene	Biosynthesis of secondary metabolites	M+H, M+NH4, 2M+H	C10H16	4.9734	pos	-	137.132	-2.58988
Dicrocin	-	M+Na, M+2Na-H, M+H	C32H44O14	8.4997	pos	Prenol lipids	675.263	1.44219
Pitheduloside B	-	M+NH4, M+Na, M+H-2H2O	C46H74O16	8.462	pos	Prenol lipids	847.515	-2.44549
3,6,8-dodecatrien-1-ol	-	M+H-H2O, M+NH4, M+H	C12H20O	8.6792	pos	-	198.185	-2.19338
Cyclokievitone hydrate	-	M+H-H2O, M+K, M+H-2H2O	C20H20O7	4.4247	pos	Cinnamic acids and derivatives	411.091	-2.5091
5-Isopropylbicyclo[3.1.0]hexan-2-one	-	M+H-H2O, M+NH4, M+H	C9H14O	9.0742	pos	Organooxygen compounds	156.138	-1.0089
6,10-dimethyl-9-methylene-undec-5E-en-2-one	-	M+H-H2O, M+H, M+NH4	C14H24O	9.0742	pos	-	226.216	-2.33329
6,10-Dimethyl-5(E),9-undecadien-2-one	-	M+H-H2O, M+NH4, M+H	C13H22O	9.0742	pos	-	212.2	-2.1686
8E,10E-Dodecadienal	-	M+H-H2O, M+NH4, M+H	C12H20O	9.0742	pos	-	198.185	-2.44996
2,6,6-Trimethyl-1-cyclohexen-1-acetaldehyde	-	M+H-H2O, M+H, M+NH4	C11H18O	9.0742	pos	Organooxygen compounds	184.169	-2.08599
(1R,4R)-Dihydrocarvone	Limonene and pinene degradation	M+H-H2O, M+NH4, M+H	C10H16O	9.0742	pos	-	135.117	-1.98198
6-Tridecynoic acid	-	M+H-H2O, M+H, M+NH4	C13H22O2	9.2898	pos	-	228.195	-1.85812
1-Naphthyl beta-D-glucuronide	-	M+H-2H2O, M+H-H2O, M+H	C16H16O7	4.147	pos	-	285.077	4.25822
Rosifoliol	-	M+H-H2O, M+H, M+NH4	C15H26O	9.576	pos	Prenol lipids	240.232	-1.64492
PG(16:1(9Z)/0:0)	-	M+H-2H2O, M+H, M+H-H2O	C22H43O9P	9.6059	pos	-	465.26	-2.68946
Dihydronepetalactone	-	M+H, 2M+H, M+H-H2O	C10H16O2	3.9973	pos	Prenol lipids	169.122	-2.64282
PC(12:0/17:0)	-	M+Na, M+K, M+H	C37H74NO8P	9.8929	pos	-	692.542	0.234818
PS(18:3(6Z,9Z,12Z)/20:0)	-	M+H, M+NH4, M+ACN+H	C44H80NO10P	9.9982	pos	Glycerophospholipids	831.567	2.05274
Glucocerebrosides	-	M+H-H2O, M+Na, M+H	C40H75NO9	10.4448	pos	-	736.531	-2.49136
1-Palmitoyl-2-linoleoyl PE	-	M+H, M+Na, M+2Na-H	C39H74NO8P	10.8478	pos	-	738.503	-2.82074
Asteltoxin	-	M+H-2H2O, M+H-H2O, M+H	C23H30O7	3.6607	pos	Furofurans	419.205	-4.07263
Mulberrofuran A	-	M+H-H2O, M+H, M+H-2H2O	C25H28O4	3.6532	pos	2-arylbenzofuran flavonoids	357.189	9.41775
9-Undecynoic acid 9-Hendecynoic acid	-	M+H-2H2O, M+H, M+H-H2O	C11H18O2	2.9966	pos	-	165.127	-1.95111
1-Hydroxyepiacorone	-	M+H-H2O, M+H, M+H-2H2O	C15H24O3	2.9667	pos	Organooxygen compounds	235.169	-2.27953
Decarbamoylneosaxitoxin	-	M+H-H2O, M+NH4, M+H	C9H16N6O4	2.8624	pos	Saxitoxins, gonyautoxins, and derivatives	255.122	6.82142
Ciceritol	-	M+H, M+K, M+CH3OH+H	C19H34O16	2.7506	pos	Organooxygen compounds	557.146	9.14842
Mexicanin E	-	M+NH4, 2M+NH4, M+H-H2O	C14H16O3	2.7432	pos	-	250.143	-1.56137
Brefeldin A	-	M+H-H2O, M+H, M+H-2H2O	C16H24O4	2.5421	pos	-	281.174	-2.25846
2',4'-Dihydroxy-3,4-methylenedioxydihydrochalcone	-	M+H-H2O, M+H, M+H-2H2O	C16H14O5	2.3855	pos	-	269.08	-2.52195
Trehalose 6-phosphate	Metabolic pathways;Starch and sucrose metabolism	M+H, M+K	C12H23O14P	0.5579	pos	Organooxygen compounds	461.045	-2.2573
Cytosine	Pyrimidine metabolism;Metabolic pathways	M+H, M+ACN+Na	C4H5N3O	0.624	pos	Diazines	175.06	0.324774
Acexamic acid	-	M+H-H2O, M+ACN+H	C8H15NO3	0.6533	pos	-	156.102	-1.02115
Trans-Caffeic acid [apiosyl-(1->6)-glucosyl] ester	-	M+H-2H2O, M+Na	C20H26O13	0.6459	pos	Isoflavonoids	497.126	-6.70988
4-Methylene-L-glutamine	C5-Branched dibasic acid metabolism	M+H, M+ACN+H	C6H10N2O3	0.6459	pos	-	159.076	-1.88811
Glutaral (Glutaraldehyde)	-	M+H-H2O, M+H	C5H8O2	0.6459	pos	-	101.06	3.0821
Methyl beta-D-galactoside	ABC transporters	M+ACN+H, 2M+ACN+H	C7H14O6	0.8778	pos	-	430.191	-3.52798
3-maleylpyruvic acid	Metabolic pathways;Tyrosine metabolism	M+H-H2O, M+H	C7H6O6	0.9152	pos	-	169.013	-1.68832
L-Glutamic gamma-semialdehyde	Metabolic pathways;Biosynthesis of secondary metabolites;Arginine and proline metabolism;Carbapenem biosynthesis;Biosynthesis of amino acids	M+CH3OH+H, M+ACN+H	C5H9NO3	0.9077	pos	Carboxylic acids and derivatives	173.092	-2.50722
N2-Acetyl-L-aminoadipate	-	M+H-2H2O, M+H	C8H13NO5	0.6167	pos	-	204.086	-1.42118
(-)-Betonicine	-	M+H, 2M+H	C7H13NO3	0.5948	pos	-	160.096	-2.60223
1D-1-Guanidino-3-amino-1,3-dideoxy-scyllo-inositol 4-phosphate	-	M+H, M+CH3OH+H	C7H17N4O7P	1.177	pos	-	333.115	-7.03609
Succinylproline	-	M+H, M+CH3OH+H	C9H13NO5	1.1996	pos	-	216.086	-1.94059
2-O-a-L-Fucopyranosyl-galactose	-	M+Na, M+K	C12H22O10	1.2373	pos	Fatty Acyls	349.11	-2.57068
3-(3,4-Dihydroxyphenyl)lactate	Tyrosine metabolism	M+H, 2M+ACN+H	C9H10O5	1.3346	pos	-	199.06	-2.12955
10-Hydroxyloganin	-	M+H, M+Na	C17H26O11	1.3794	pos	-	407.154	-2.46603
Methyl 4-methoxybenzoate	-	M+H, M+NH4	C9H10O3	1.3869	pos	Benzene and substituted derivatives	167.07	-1.96545
(2S)-2-{[1-(R)-Carboxyethyl]amino}pentanoate	-	M+H, M+ACN+Na	C8H15NO4	1.372	pos	-	190.107	-2.27845
3-[(2-Mercapto-1-methylpropyl)thio]-2-butanol	-	M+H, M+ACN+H	C8H18OS2	1.3421	pos	Alcohols and polyols	236.112	7.57048
9-O-acetylneuraminic acid	-	M+CH3OH+H, M+ACN+Na	C11H19NO9	1.3121	pos	-	342.14	1.29074
1,4-Benzodioxin-2(3H)-one	-	M+H, M+ACN+H	C8H6O3	1.3047	pos	Benzodioxanes	151.039	-2.22801
7-Aminoflunitrazepam	-	M+Na, M+ACN+H	C16H14FN3O	1.2824	pos	Benzodiazepines	306.1	-5.48858
Hydroxyphenyllactic acid	Ubiquinone and other terpenoid-quinone biosynthesis;Biosynthesis of secondary metabolites;Tyrosine metabolism	M+H-2H2O, M+H	C9H10O4	1.2973	pos	Phenylpropanoic acids	147.044	-1.84163
Benzofuran	-	M+H, M+NH4	C8H6O	0.6681	pos	Benzofurans	136.075	-0.00670178
3-Furanmethanol glucoside	-	M+H-H2O, M+2Na-H	C11H16O7	0.6755	pos	Organooxygen compounds	243.086	-1.85559
1-Kestose	-	M+NH4, M+Na	C18H32O16	0.7279	pos	Organooxygen compounds	527.157	-1.98519
Stachyose	Galactose metabolism	M+NH4, M+Na	C24H42O21	0.7279	pos	Organooxygen compounds	684.254	-2.09038
Sucrose	Metabolic pathways;Starch and sucrose metabolism;ABC transporters;Galactose metabolism	M+NH4, M+Na	C12H22O11	0.7353	pos	Organooxygen compounds	365.105	-2.3907
Cystathionine ketimine	-	M+H-H2O, M+H	C7H9NO4S	0.7653	pos	Carboxylic acids and derivatives	186.022	-1.86733
AminoDHQ	-	M+H-H2O, M+H	C7H11NO5	0.6606	pos	-	172.06	-1.62831
(1R,2S)-8-Methyl-1,2-dihydro-1,2-naphthalenediol	-	M+NH4, 2M+NH4	C11H12O2	0.9226	pos	-	194.117	-1.91219
Trans-4-Coumaric acid	-	M+H-H2O, M+NH4	C9H8O3	0.96	pos	-	182.081	-1.88409
Cis-3-(carboxyethyl)-3,5-cyclohexadiene-1,2-diol	-	M+NH4, M+ACN+H	C9H12O4	0.975	pos	-	202.107	-2.15233
Phenylacetaldehyde	Metabolic pathways;Phenylalanine metabolism	M+H, M+NH4	C8H8O	0.9899	pos	Benzene and substituted derivatives	121.065	-0.61392
6-Maleimidocaproic acid	-	M+H-H2O, M+H	C10H13NO4	1.0124	pos	-	212.091	-1.40318
Tuliposide A	-	M+H, M+NH4	C11H18O8	0.9899	pos	-	296.134	-2.66888
Seryllysine	-	M+H, M+Na	C9H19N3O4	0.9152	pos	Carboxylic acids and derivatives	256.129	-2.19493
5-Hydroxy-DL-tryptophan	-	M+H-H2O, M+H	C11H12N2O3	1.0273	pos	-	221.092	-1.86607
Osmaronin	-	M+ACN+Na, 2M+ACN+H	C11H17NO6	1.0273	pos	Fatty Acyls	323.123	6.31271
Indole-3-acetamide	Tryptophan metabolism	M+H-H2O, M+H	C10H10N2O	1.0273	pos	-	175.086	-1.23393
1-(gamma-Glutamylamino)cyclopropanecarboxylic acid	-	M+H-H2O, M+H	C9H14N2O5	0.9152	pos	Carboxylic acids and derivatives	213.087	-1.92772
(1xi,2xi)-1-(4-Hydroxyphenyl)-1,2,3-propanetriol 3-O-beta-D-Glucopyranoside	-	M+Na, M+K	C15H22O9	1.072	pos	Fatty Acyls	369.115	-0.379385
Hypoxanthine	Metabolic pathways;Purine metabolism	M+H-2H2O, M+H	C5H4N4O	1.087	pos	Imidazopyrimidines	137.046	-8.09672
N-Formyl-D-kynurenine	-	M+H-H2O, M+H	C11H12N2O4	1.087	pos	-	237.086	-1.99828
(Dimethoxymethyl)benzene	-	M+H-H2O, M+H	C9H12O2	1.1169	pos	Benzene and substituted derivatives	135.08	-1.37354
Phenol	Tyrosine metabolism	M+H-H2O, M+H	C6H6O	1.4391	pos	Phenols	95.0493	3.70129
Octopamine (p-Hydroxyphenylethanolamine)	-	M+H, M+Na	C8H11NO2	1.4611	pos	-	154.086	-2.27638
Cis-Zeatin 9-glucoside	-	M+H, M+Na	C16H23N5O6	1.476	pos	Organooxygen compounds	404.149	-5.97493
6-(3-ethenylphenoxy)-3,4,5-trihydroxyoxane-2-carboxylic acid	-	M+CH3OH+H, M+ACN+H	C14H16O7	1.4985	pos	Organooxygen compounds	338.122	-9.97863
(7'x,8'x)-4,7'-Epoxy-3,8'-bilign-7-ene-3,5'-dimethoxy-4',9,9'-triol	-	M+H-H2O, M+H	C20H22O6	1.5209	pos	2-arylbenzofuran flavonoids	341.137	-3.18802
3-Methyloxindole	-	M+H, 2M+ACN+H	C9H9NO	1.5209	pos	-	336.164	-1.72347
Benzylformate	Metabolic pathways;Phenylalanine metabolism	M+H-H2O, M+H	C8H8O2	1.5358	pos	-	137.059	-0.617605
Bellendine	-	M+H, M+ACN+H	C12H15NO2	1.5656	pos	-	206.117	-2.06123
Vanillactic acid	-	M+H-H2O, M+H	C10H12O5	1.588	pos	Phenylpropanoic acids	195.065	-2.19717
Swertiamarin	-	M+H, M+H-H2O	C16H22O10	1.588	pos	-	375.128	-2.33438
M-Hydroxyphenylpyruvic acid	-	M+H-H2O, M+H	C9H8O4	1.6029	pos	-	163.039	-2.36341
1-O-sinapoyl-beta-D-glucose	Phenylpropanoid biosynthesis	M+H-H2O, M+H	C17H22O10	1.6103	pos	-	387.128	-2.27913
Gentisyl alcohol	-	M+H-2H2O, M+H	C7H8O3	1.6178	pos	-	141.054	0.468919
Threoninyl-Proline	-	M+H-2H2O, M+NH4	C9H16N2O4	1.655	pos	Carboxylic acids and derivatives	234.148	-2.10502
3-Methylquinolin-2-one	-	M+H-H2O, M+H	C10H9NO	1.7221	pos	-	142.065	-1.6315
4-formyl Indole	-	M+H-H2O, M+H	C9H7NO	1.7221	pos	-	146.06	-0.239261
(2S)-2-Hydroxy-3-propylsuccinic acid	-	M+H-2H2O, M+Na	C7H12O5	1.863	pos	-	141.054	-1.75763
N-lactoyl-Tyrosine	-	M+H-H2O, M+CH3OH+H	C12H15NO5	1.8705	pos	Carboxylic acids and derivatives	286.128	-1.90429
3-Indoleacetic Acid	Metabolic pathways;Tryptophan metabolism;Plant hormone signal transduction	M+H, M+CH3OH+H	C10H9NO2	1.8705	pos	-	208.096	-1.95433
Sesamol	-	M+H-H2O, M+H	C7H6O3	1.9004	pos	Benzodioxoles	139.039	-0.78142
2,5,8-trihydroxy-6-methoxy-2-methyl-3H-benzo[g]chromen-4-one	-	M+ACN+H, M+NH4	C15H14O6	1.9079	pos	-	308.111	-1.9013
3-(6-hydroxy-2,3,4-trimethoxyphenyl)prop-2-enoic acid	-	M+H-H2O, M+H	C12H14O6	1.9303	pos	Cinnamic acids and derivatives	237.075	-2.49556
Cappariloside A	-	M+Na, 2M+K	C16H18N2O6	1.9451	pos	Organooxygen compounds	357.107	2.80245
Decenedioic acid	-	M+H-H2O, M+H	C10H16O4	1.9823	pos	-	201.112	-2.20248
Nepetaside	-	M+H-2H2O, M+NH4	C16H26O8	2.0122	pos	Prenol lipids	311.149	1.23045
3-Amino-4-hydroxybenzoic acid	-	M+H-H2O, M+H	C7H7NO3	2.0946	pos	-	154.05	-1.56174
Gentiobiosyl 2-methyl-6-oxo-2E,4E-heptadienoate	-	M+H-H2O, M+K	C20H30O13	2.1095	pos	Organooxygen compounds	517.133	-2.54758
Decursinol	-	M+H-H2O, M+H	C14H14O4	2.1244	pos	-	247.096	-1.97501
Antiarone A	-	M+H, M+Na	C25H26O6	2.1244	pos	-	423.178	-4.98689
Foeniculoside V	-	M+H-H2O, M+NH4	C16H28O8	2.2063	pos	Prenol lipids	331.174	-2.73091
Benzenemethanol, 2-(2-hydroxypropoxy)-3-methyl-	-	M+H-H2O, M+H	C11H16O3	2.2585	pos	-	197.117	-2.22808
(-)-Hygromycin A	-	M+H-H2O, M+H	C23H29NO12	2.2659	pos	-	512.175	-2.62732
Methyl 3-(2,3-dihydroxy-3-methylbutyl)-4-hydroxybenzoate	-	M+H-H2O, M+H	C13H18O5	2.2734	pos	Benzene and substituted derivatives	237.111	-2.58435
2',6'-Dihydroxy-4'-methoxyacetophenone	-	M+H-H2O, M+H	C9H10O4	2.2883	pos	Organooxygen compounds	165.054	-2.00832
5-Methyl-2-furaldehyde	-	M+H-H2O, M+H	C6H6O2	2.3032	pos	-	111.044	1.72986
1,6-Dihydroxy-4-methyl-2,4-cyclohexadiene-1-carboxylic acid	-	M+H-H2O, M+H	C8H10O4	2.3032	pos	-	153.054	-1.96187
Loganin	Metabolic pathways;Biosynthesis of secondary metabolites;Monoterpenoid biosynthesis	M+H, M+Na	C17H26O10	2.3032	pos	-	391.159	-2.60782
Lusitanicoside	-	M+H, M+2Na-H	C21H30O10	2.3705	pos	Organooxygen compounds	487.142	-5.13144
EUPATORIOCHROMENE	-	M+NH4, M+CH3OH+H	C13H14O3	2.4823	pos	-	236.128	-2.35082
S-Glutaryldihydrolipoamide	Metabolic pathways;Lysine degradation	M+H-H2O, M+H	C13H23NO4S2	2.5048	pos	Fatty Acyls	322.113	-2.40523
5'-Hydroxycastavinol	-	M+H-H2O, M+H	C26H30O14	2.5496	pos	Flavonoids	567.169	-5.10746
4-Methoxyphenylacetic acid	-	M+H-2H2O, M+H	C9H10O3	2.5793	pos	Phenol ethers	131.049	-1.34358
Sonchuionoside C	-	M+Na, M+H	C19H30O8	2.6165	pos	Prenol lipids	409.183	-0.984501
IN00458	-	M+H, 2M+H	C9H6O3	2.6912	pos	-	163.039	-2.55964
Domoic acid	-	M+H-2H2O, M+H	C15H21NO6	2.7581	pos	Carboxylic acids and derivatives	276.126	8.53585
Carbendazim	-	M+H, M+NH4	C9H9N3O2	2.7805	pos	Benzimidazoles	209.107	2.65692
Melleolide H	-	M+H-H2O, M+H	C24H30O7	2.7805	pos	Prenol lipids	413.195	-3.15422
3-Methyl-2-buten-1-ol	-	M+H, M+CH3OH+H	C5H10O	2.8251	pos	-	87.0807	2.79662
Cyclocalopin F	-	M+H-H2O, M+ACN+H	C15H18O6	2.8251	pos	Furopyrans	336.143	-2.12609
3-Indolebutyric acid	-	M+H-H2O, M+H	C12H13NO2	2.855	pos	Indoles and derivatives	204.101	-2.14693
2-Phenylethanol	Phenylalanine metabolism	M+H-H2O, M+CH3OH+H	C8H10O	2.9966	pos	Benzene and substituted derivatives	105.07	0.380865
(S)-Isosclerone	-	M+NH4, 2M+K	C10H10O3	3.0488	pos	Tetralins	196.096	-2.24911
Beta-Thujaplicin	-	M+NH4, M+Na	C10H12O2	3.1307	pos	Tropones	187.075	-1.84098
Leucopelargonidin	Metabolic pathways;Flavonoid biosynthesis;Biosynthesis of secondary metabolites	M+H-H2O, M+CH3OH+H	C15H14O6	3.1681	pos	Flavonoids	273.075	-2.80999
3-O-Feruloylquinic acid	-	M+ACN+H, 2M+ACN+H	C17H20O9	3.2277	pos	Organooxygen compounds	410.143	-3.93155
4-Coumaroylshikimate	Metabolic pathways;Flavonoid biosynthesis;Phenylpropanoid biosynthesis;Biosynthesis of secondary metabolites;Stilbenoid, diarylheptanoid and gingerol biosynthesis	M+H-H2O, M+H	C16H16O7	3.3098	pos	-	321.096	-2.38155
P-Mentha-1,3,8-triene	-	M+H, 2M+H	C10H14	3.3098	pos	Prenol lipids	135.117	-2.35982
Trans-2-Hexyl-1-cyclopropaneacetic acid	-	M+H-H2O, M+ACN+Na	C11H20O2	3.3247	pos	Carboxylic acids and derivatives	248.164	-1.6985
Hydroxyisonobilin	-	M+H-H2O, M+H	C20H26O6	3.4142	pos	Prenol lipids	345.169	-2.5704
Trans-5-O-(4-coumaroyl)-D-quinic acid	-	M+H-H2O, M+H	C16H18O8	3.4217	pos	-	339.107	-2.34186
N-(2-Phenylethyl)-acetamide	-	M+H-H2O, M+H	C10H13NO	3.4366	pos	-	164.107	-1.88297
Enicoflavine	-	M+H-H2O, M+H	C10H13NO4	3.4441	pos	-	194.081	-1.7763
3,4,5-trihydroxy-6-[(3-phenyloxiran-2-yl)methoxy]oxane-2-carboxylic acid	-	M+H, 2M+NH4	C15H18O8	3.4814	pos	Organooxygen compounds	670.233	-4.2729
DL-o-Tyrosine	-	M+H-H2O, M+H	C9H11NO3	3.4963	pos	-	164.07	-2.44199
Mulberrofuran E	-	M+H-H2O, M+CH3OH+H	C39H36O8	3.5038	pos	2-arylbenzofuran flavonoids	665.28	8.04057
7-Hydroxy-1,7-bis(4-hydroxy-3-methoxyphenyl)-1-heptene-3,5-dione	-	M+H, M+K	C21H22O7	3.5337	pos	Diarylheptanoids	425.107	-3.56307
Oleoside dimethyl ester	-	M+H-H2O, M+2Na-H	C18H26O11	3.5412	pos	Prenol lipids	463.122	-7.14245
Ginkgolide B	-	2M+3H2O+2H, M+CH3OH+H	C20H24O10	3.5487	pos	Prenol lipids	457.167	-8.18107
MFCD15144952	-	M+H-H2O, M+H	C5H8O4	3.5562	pos	-	115.039	-0.178186
Formylfusarochromanone	-	M+H-H2O, M+H	C16H20N2O5	3.5786	pos	Benzopyrans	303.133	-2.97383
3',4',5'-Trimethoxycinnamyl alcohol	-	M+H, M+ACN+Na	C12H16O4	3.7355	pos	Cinnamyl alcohols	225.112	-2.11343
PLAUNOL B	-	M+H-2H2O, M+H	C20H20O6	3.7729	pos	-	357.133	-2.43321
(R)-1-O-b-D-glucopyranosyl-1,3-octanediol	-	M+H-H2O, M+Na	C14H28O7	3.8104	pos	Fatty Acyls	331.174	-1.73665
Linusitamarin	-	M+H-H2O, M+H	C17H22O9	3.8328	pos	Cinnamic acids and derivatives	371.133	-2.90163
7-Hydroxy-5-isopropyl-2-methoxy-3-methyl-1,4-naphthoquinone	-	M+H-2H2O, M+NH4	C15H16O4	3.8777	pos	Naphthalenes	225.09	-2.2286
3-(1,1-Dimethylallyl)scopoletin	-	M+NH4, M+ACN+H	C15H16O4	3.975	pos	Coumarins and derivatives	278.138	-2.88519
1,2,3-Trihydroxybenzene	-	M+H-H2O, M+H	C6H6O3	3.9675	pos	Phenols	127.039	-0.0529506
2-Hydroxy-3-(4-methoxyphenyl)propanoic acid	-	M+H-H2O, M+H	C10H12O4	4.0347	pos	Phenylpropanoic acids	179.07	-2.24892
(x)-1,2-Propanediol 1-O-b-D-glucopyranoside	-	M+K, 2M+ACN+Na	C9H18O7	4.0421	pos	Organooxygen compounds	540.233	6.38498
5-Megastigmen-7-yne-3,9-diol 9-glucoside	-	M+NH4, M+Na	C19H30O7	4.0721	pos	Fatty Acyls	393.187	-3.4722
Cis-5-Octenoic acid	-	M+H, M+Na	C8H14O2	4.0871	pos	Fatty Acyls	165.091	-2.05845
Ichthyothereol	-	M+H-H2O, M+H	C14H14O2	4.1096	pos	-	215.106	-2.08406
Methyl dioxindole-3-acetate	-	M+H, M+CH3OH+H	C11H11NO4	4.1171	pos	Indoles and derivatives	254.102	-2.41211
Cinnamaldehyde	Metabolic pathways;Phenylpropanoid biosynthesis;Biosynthesis of secondary metabolites	M+H-H2O, M+H	C9H8O	4.3119	pos	Cinnamaldehydes	133.065	-0.304002
6-[(2,2-dimethyl-2H-chromen-5-yl)oxy]-3,4,5-trihydroxyoxane-2-carboxylic acid	-	M+H-H2O, M+H	C17H20O8	4.4097	pos	Organooxygen compounds	335.112	-2.07177
Nerol	-	M+H-H2O, M+Na	C10H18O	4.4922	pos	-	137.132	-2.05111
Diphenhydramine N-glucuronide	-	M+NH4, M+Na	C23H30NO7+	4.5152	pos	Carboxylic acids and derivatives	455.188	-9.41946
(S)-a-Amino-2,5-dihydro-5-oxo-4-isoxazolepropanoic acid N2-glucoside	-	M+H-H2O, M+H	C12H18N2O9	4.583	pos	Organooxygen compounds	335.112	9.70638
Capsidiol	Sesquiterpenoid and triterpenoid biosynthesis	M+H-H2O, M+K	C15H24O2	4.583	pos	Prenol lipids	219.174	-2.19822
2-(2-Furanyl)-3-piperidinol	-	M+H, M+Na	C9H13NO2	4.6206	pos	Organonitrogen compounds	168.102	-1.78989
CDP-DG(16:1(9Z)/18:2(9Z,12Z))	-	M+2H, M+H	C46H79N3O15P2	4.6282	pos	Glycerophospholipids	976.502	-4.62149
S-(Hydroxymethyl)glutathione	-	M+H, M+CH3OH+H	C11H19N3O7S	4.6883	pos	Carboxylic acids and derivatives	338.101	-0.937641
(2R,3R)-(-)-2,3-Butanediol	Butanoate metabolism	M+H-H2O, 2M+ACN+H	C4H10O2	4.6957	pos	-	73.0652	4.32221
Artemidinol	-	M+H, M+Na	C13H12O3	4.7931	pos	Isocoumarins and derivatives	217.085	-2.36738
(8)-Gingerol	-	M+H-2H2O, M+H	C19H30O4	4.8006	pos	-	323.221	-2.28418
Xi-Linalool 3-[rhamnosyl-(1->6)-glucoside]	-	M+NH4, M+Na	C22H38O10	4.8081	pos	Fatty Acyls	485.235	-2.65324
(±)-Borneol	-	M+H-H2O, M+H	C10H18O	4.7856	pos	-	137.132	-2.23667
(25R)-26,26,26-trifluoro-1alpha,25-dihydroxyvitamin D3	-	M+H, M+2Na-H	C27H41F3O3	4.8984	pos	-	471.309	2.78115
25-Cinnamoyl-vulgaroside	-	M+ACN+H, M+2Na-H	C34H46O7	4.8984	pos	Prenol lipids	611.302	7.91715
Cyclocalopin C1	-	M+ACN+H, 2M+Na	C15H20O6	4.951	pos	Furopyrans	615.244	-3.98299
Centellasapogenol A	-	M+H-2H2O, M+H	C30H48O5	4.9809	pos	Prenol lipids	453.335	-2.34498
Beta-Humulene	-	M+H, 2M+H	C15H24	4.9734	pos	Prenol lipids	409.382	-2.64585
5-Methyldeoxycytidine	-	M+H-2H2O, M+Na	C10H15N3O4	5.0329	pos	Pyrimidine nucleosides	264.099	2.2757
7-hydroxymethotrexate	-	M+H, M+CH3OH+H	C20H22N8O6	5.1077	pos	Pteridines and derivatives	503.188	-7.95174
5-(1-oxopropan-2-yl)isolongifol-5-ene	-	M+H-H2O, M+H	C18H28O	5.0851	pos	-	261.221	-2.34662
(3alpha,7alpha,12R)-3,7,15-Trihydroxy-12,13-epoxytrichothec-9-en-8-one	-	M+H, M+Na	C15H20O6	5.1454	pos	-	297.132	-2.61002
Methyl (3b,11x)-3-Hydroxy-8-oxo-6-eremophilen-12-oate	-	M+H-H2O, M+CH3OH+H	C16H24O4	5.1681	pos	Prenol lipids	263.163	-2.46423
Aurin	-	M+H, M+CH3OH+H	C19H14O3	5.1907	pos	-	323.127	-3.50531
Trans-p-Menthane-1,7,8-triol 8-glucoside	-	M+NH4, M+Na	C16H30O8	5.2584	pos	Organooxygen compounds	373.182	-1.95838
10,11-dihydro-20-trihydroxy-leukotriene B4	-	M+H-H2O, M+Na	C20H34O7	5.2735	pos	Fatty Acyls	409.219	-1.86164
Leukotriene F4	Arachidonic acid metabolism;Metabolic pathways	M+NH4, M+Na	C28H44N2O8S	5.3413	pos	Fatty Acyls	591.276	9.50096
Dihydrodeoxy-8-epiaustdiol	-	M+NH4, M+Na	C12H14O4	5.3413	pos	Azaphilones	240.122	-2.71437
9-OxoODE	Linoleic acid metabolism	M+H-H2O, M+H	C18H30O3	5.3942	pos	Fatty Acyls	277.215	-2.62674
Tetranor-12(S)-HETE	-	M+H-H2O, M+H	C16H26O3	5.4017	pos	-	249.184	-2.38426
4alpha-formyl-4beta-methyl-5alpha-cholesta-8,24-dien-3beta-ol	-	M+H-H2O, M+H	C29H46O2	5.4925	pos	Prenol lipids	409.345	-2.41411
C16 Sphinganine	-	M+H, M+Na	C16H35NO2	5.5226	pos	-	274.273	-3.21165
3-(1,2,3,4-Tetrahydro-6-hydroxy-2-naphthyl)cyclopentanone	-	M+H-H2O, M+H	C15H18O2	5.6051	pos	-	231.137	-2.42825
(-)-Jasmonoyl-L-isoleucine	Plant hormone signal transduction	M+H-H2O, M+H	C18H29NO4	5.6805	pos	-	324.216	-2.26224
Furanogermenone	-	M+H-H2O, M+H	C15H20O2	5.7329	pos	Prenol lipids	233.153	-2.0783
1-Acetoxy-2-hydroxy-16-heptadecyn-4-one	-	M+H-H2O, M+Na	C19H32O4	5.703	pos	Fatty Acyls	307.226	-2.83941
17-phenoxy trinor Prostaglandin F2alpha isopropyl ester	-	M+H-H2O, M+H	C26H38O6	5.9218	pos	-	447.273	-2.42329
Altersolanol A	-	M+H-2H2O, 2M+Na	C16H16O8	4.4172	pos	-	301.07	-2.27655
(9R,10E,12Z,15Z)-9-Hydroperoxy-10,12,15-octadecatrienoic acid	-	M+NH4, M+K	C18H30O4	5.9596	pos	-	328.247	-2.8729
Asclepin	-	M+H, M+ACN+H	C31H42O10	6.0276	pos	-	616.314	3.71192
Heliannuol A	-	M+Na, M+ACN+H	C15H22O3	6.0578	pos	Oxocins	273.148	6.87712
1alpha,25-dihydroxy-26,27-dimethyl-22,22,23,23-tetradehydrovitamin D3	-	M+H-2H2O, M+H	C29H44O3	6.0427	pos	-	441.332	-2.18476
(5S)-hydroperoxy-18-hydroxy-EPE	-	M+H, M+CH3OH+H	C20H30O5	6.0805	pos	Fatty Acyls	383.242	-5.12727
15(R)-17-phenyl trinor PGF2alpha isopropyl ester	-	M+H, M+Na	C26H38O5	6.1713	pos	-	431.278	-2.69512
Thromboxane B3	-	M+H-H2O, M+Na	C20H32O6	6.1788	pos	Fatty Acyls	351.215	-4.77417
(7R*,8R*)-3-Methoxy-3',4,7,9,9'-pentahydroxy-8,4'-oxyneolignan 4-xyloside	-	M+Na, M+CH3OH+H	C24H32O11	4.4021	pos	Lignan glycosides	529.217	-2.42014
Alpha-Crocetin glucosyl ester	-	M+H+Na, M+2Na	C26H34O9	6.3146	pos	Prenol lipids	268.109	9.80088
5'-Carboxy-gamma-chromanol	-	M+H-H2O, M+H	C18H26O4	6.3071	pos	Benzopyrans	289.179	-2.62994
Rutalinium	-	M+Na, M+K	C16H20NO4+	4.3418	pos	Quinolines and derivatives	329.101	-5.75201
Pachydictiol A	-	M+H-H2O, M+H	C20H32O	6.3822	pos	-	271.241	-2.89753
3,4-dihydroxy-2-(8-hydroxy-3,7-dimethylocta-2,6-dien-1-yl)benzoic acid	-	M+Na, 2M+NH4	C17H22O5	6.3973	pos	Benzene and substituted derivatives	630.33	3.92951
Plastoquinone-1	-	M+H-H2O, M+H-2H2O	C13H16O2	4.3119	pos	-	187.111	-2.45771
Hericenone C	-	M+NH4, M+Na	C35H54O6	6.4351	pos	Prenol lipids	588.43	7.61269
(E)-4-stilbenol	-	M+H-H2O, M+H	C14H12O	4.3119	pos	-	197.096	-2.27286
6-hydroxysphingosine	-	M+H-H2O, M+H	C18H37NO3	6.488	pos	-	316.284	-2.42018
Soraphen O	-	M+H-2H2O, M+H	C18H28O4	6.5106	pos	-	309.205	-2.54992
(-)-Prostaglandin E1	-	M+H-H2O, M+NH4	C20H34O5	6.5934	pos	-	337.236	-3.14181
7,10-Hexadecadiynoic acid	-	M+H-H2O, M+H	C16H24O2	6.5934	pos	-	249.184	-2.17903
Leukotriene B5	-	M+H-H2O, M+CH3OH+H	C20H30O4	6.6841	pos	Fatty Acyls	367.247	-2.98735
9Z,13-Tetradecadien-11-ynal	-	M+H-H2O, M+H	C14H20O	6.6992	pos	-	205.158	-1.96881
Glucoconvallasaponin B	-	M+H-2H2O, M+NH4	C38H62O15	6.8722	pos	Steroids and steroid derivatives	723.391	-5.02238
(±)9-HpODE	-	M+H-H2O, M+Na	C18H32O4	6.8873	pos	-	335.218	-2.49926
Polypodosaponin	-	M+NH4, M+Na	C39H62O13	6.9329	pos	Steroids and steroid derivatives	761.407	-2.316
1alpha,25-dihydroxyvitamin D2	-	M+H, M+H-H2O	C28H44O3	6.8195	pos	-	411.325	-2.97228
Falcarindiol	-	M+H-H2O, M+H-2H2O	C17H24O2	6.8195	pos	Fatty Acyls	243.174	-2.63632
Hydroxyisopatchoulenone	-	M+H-2H2O, M+H-H2O	C15H22O2	6.8195	pos	-	199.148	-2.21175
Capillanol	-	M+H-H2O, M+H	C12H14O	6.8195	pos	-	157.101	-2.11427
Prosapogenin	-	M+H-H2O, M+Na	C36H54O11	7.0537	pos	Prenol lipids	645.361	-3.32286
Podecdysone B	-	M+H-H2O, M+H	C27H42O6	7.0688	pos	-	463.304	-2.44746
Corchorifatty acid A	-	M+H, M+Na	C18H28O4	6.7896	pos	Fatty Acyls	331.187	-3.00681
Misoprostol	-	M+H, M+Na	C21H36O5	7.2348	pos	Fatty Acyls	391.244	-2.05098
15beta-Hydroxydesogestrel	-	M+H-H2O, M+CH3OH+H	C22H30O2	7.3023	pos	Steroids and steroid derivatives	309.22	-2.63028
Hovenidulcioside B1	-	M+H+Na, M+CH3OH+H	C44H70O16	7.3324	pos	Prenol lipids	887.51	4.28769
2-Hydroxy-3-oxo-12-oleanen-28-oic acid	-	M+H-2H2O, M+H	C30H46O4	7.4151	pos	Prenol lipids	435.324	-2.71659
2,3-Dihydro-3-hydroxy-6-methoxy-2,2-dimethyl-4H-1-benzopyran-4-one	-	M+H-H2O, M+Na	C12H14O4	7.4526	pos	Benzopyrans	205.085	-2.09875
(4E,8E,10E-d18:3)sphingosine	-	M+H, M+Na	C18H33NO2	7.4677	pos	-	296.258	-2.69239
6-[5]-ladderane-1-hexanol	-	M+H, M+NH4	C18H28O	7.5505	pos	-	278.247	-2.44875
Isozaluzanin C	-	M+H, 2M+K	C15H18O3	4.1395	pos	-	247.132	-2.53071
18R-HEPE	-	M+H-H2O, M+CH3OH+H	C20H30O3	7.641	pos	Fatty Acyls	301.215	-2.50414
MG(18:3(6Z,9Z,12Z)/0:0/0:0)	-	M+H-H2O, M+H	C21H36O4	7.6788	pos	Fatty Acyls	353.268	-2.77347
15-keto-PGF1alpha	-	M+H-H2O, 2M+Na	C20H34O5	7.6788	pos	Fatty Acyls	731.468	-8.96019
Gonan-3-ol	-	M+H-H2O, M+H	C17H28O	7.7013	pos	-	249.221	-2.20938
Hebevinoside VII	-	M+H-H2O, M+Na	C45H72O14	7.7844	pos	Steroids and steroid derivatives	859.479	-2.45198
All-trans-13,14-dihydroretinol	-	M+H-H2O, M+H	C20H32O	7.807	pos	Prenol lipids	289.252	-2.8159
Polypodoside A	-	M+NH4, M+Na	C45H72O17	7.8145	pos	Steroids and steroid derivatives	907.464	-2.91047
Alpha-curcumene	-	M+H, M+ACN+H	C15H22	7.8371	pos	Prenol lipids	203.179	-2.26274
3-ketosphingosine	-	M+H, M+Na	C18H35NO2	7.8371	pos	-	320.255	-2.49391
Cholesterol glucuronide	Metabolic pathways;Pentose and glucuronate interconversions	M+H-H2O, M+H	C33H54O7	7.8898	pos	Steroids and steroid derivatives	545.382	-2.2068
Gingerglycolipid B	-	M+NH4, M+Na	C33H58O14	7.8973	pos	Glycerolipids	701.37	-3.53606
1-(8Z,11Z,14Z-eicosatrienoyl)-sn-glycero-3-phosphocholine	-	M+H, M+Na	C28H52NO7P	8.1163	pos	-	546.354	-2.96709
PC(17:1(9Z)/0:0)	-	M+H, M+Na	C25H50NO7P	8.2142	pos	-	508.339	-2.13598
MG(0:0/16:0/0:0)	-	M+H-H2O, M+Na	C19H38O4	8.2517	pos	Glycerolipids	313.273	-2.80481
5alpha-Androstane-2alpha-methyl-17beta-ol	-	M+H, M+NH4	C20H34O	7.9879	pos	-	308.294	-2.58719
MG(0:0/18:1(9Z)/0:0)	-	M+H-H2O, M+H	C21H40O4	8.2666	pos	Glycerolipids	339.289	-2.24973
Janthitrem G	-	M+H-2H2O, M+NH4	C39H51NO6	8.2666	pos	Peptidomimetics	594.354	-5.83748
13-Hydroxy-9-methoxy-10-oxo-11-octadecenoic acid	-	M+H-2H2O, 2M+H	C19H34O5	7.9275	pos	Fatty Acyls	307.226	-2.3931
1-Octadecyl Lysophosphatidic Acid	-	M+H-H2O, M+H	C21H45O6P	8.4545	pos	-	407.292	0.601564
PA(20:4(5Z,8Z,11Z,14Z)/22:5(7Z,10Z,13Z,16Z,19Z))	-	M+H-H2O, M+H+Na	C45H71O8P	8.447	pos	Glycerophospholipids	753.492	8.35865
Linoleoyl Ethanolamide	-	M+H, M+Na	C20H37NO2	8.5072	pos	Organonitrogen compounds	324.289	-2.77576
(10E,12Z)-10,12-Hexadecadienal	-	M+H-H2O, M+NH4	C16H28O	8.5147	pos	-	254.247	-2.19425
Juniperic acid	-	M+H-2H2O, M+Na	C16H32O3	8.5147	pos	-	237.221	-2.31843
2-Benzylidene-1-heptanol	-	M+H-H2O, M+H	C14H20O	8.5597	pos	Cinnamyl alcohols	187.148	-2.15325
Flavidulol C	-	M+H, M+NH4	C34H42O4	8.6269	pos	Phenol ethers	532.336	3.77951
Farnesyl acetone	-	M+H, M+H-H2O	C18H30O	8.6866	pos	-	263.236	-3.14575
(+)-Camphor	Biosynthesis of secondary metabolites;Monoterpenoid biosynthesis	M+H, M+NH4	C10H16O	8.6792	pos	-	170.154	-2.27292
PE(17:0/0:0)	-	M+H, M+Na	C22H46NO7P	8.7388	pos	-	468.307	-2.98371
Isophorone	-	M+H, M+NH4	C9H14O	8.6792	pos	-	156.138	-2.11645
7-undecenoic acid	-	M+H-H2O, M+H	C11H20O2	8.9184	pos	-	167.143	-1.96393
Palmitic amide	-	M+ACN+H, 2M+H	C16H33NO	8.9631	pos	Fatty Acyls	297.289	-3.66737
PE(18:0/0:0)	-	M+H, M+Na	C23H48NO7P	9.0521	pos	-	482.322	-3.78924
Carboprost Tromethamine	-	M+H-2H2O, 2M+H	C21H36O5	9.1187	pos	Fatty Acyls	333.241	-4.49891
3-Methyl-2-cyclohexen-1-one	-	M+H, M+NH4	C7H10O	9.0742	pos	Organooxygen compounds	128.107	-0.351778
PC(19:0/0:0)	-	M+H, M+Na	C27H56NO7P	9.2374	pos	-	538.385	-3.61385
Muricatin C	-	M+H-2H2O, M+Na	C37H66O8	9.3496	pos	Fatty Acyls	661.462	-3.09848
9-HOTE	-	M+H-2H2O, 2M+ACN+H	C18H30O3	9.3721	pos	Fatty Acyls	630.478	-2.14835
3beta-3-Hydroxy-18-lupen-21-one	-	M+H-H2O, M+H	C30H48O2	9.4562	pos	Prenol lipids	441.372	-2.97409
Thonzylamine	-	M+H-H2O, 2M+H	C16H22N4O	9.4637	pos	Phenol ethers	573.375	-7.30314
3-[6-(Carboxymethylene)cyclohexa-2,4-dien-1-ylidene]-2-oxopropanate	-	M+H-H2O, M+H	C11H8O5	3.9003	pos	-	203.033	-2.33071
PE-NMe(16:0/22:2(13Z,16Z))	-	M+H-2H2O, M+K	C44H84NO8P	9.6134	pos	Glycerophospholipids	750.586	7.88847
Momordicoside L	-	M+H, M+CH3OH+H	C36H58O9	9.6659	pos	Steroids and steroid derivatives	667.452	-6.49629
[10]-Gingerdione	-	M+H, M+Na	C21H32O4	9.7489	pos	Phenols	371.221	-2.74801
PA(20:1(11Z)/0:0)	-	M+H, M+Na	C23H45O7P	9.7262	pos	-	487.28	2.49751
PG(18:1(11Z)/20:3(5Z,8Z,11Z))	-	M+NH4, M+Na	C44H79O10P	9.7036	pos	Glycerophospholipids	816.571	-5.06005
(3beta,22R,23R,24S)-3,22,23-Trihydroxystigmastan-6-one	-	M+H, M+Na	C29H50O4	9.8172	pos	Steroids and steroid derivatives	485.359	-2.8878
PGP(i-12:0/i-16:0)	-	M+H, M+Na	C34H68O13P2	9.8476	pos	Glycerophospholipids	747.419	-2.65544
(3beta,5alpha,6beta,9alpha,22E,24R)-23-Methylergosta-7,22-diene-3,5,6,9-tetrol	-	M+H, M+Na	C29H48O4	9.923	pos	Steroids and steroid derivatives	483.343	-3.65568
Tricaprilin	-	M+Na, M+CH3OH+H	C27H50O6	9.9832	pos	-	493.349	-3.01192
PG(20:4(5Z,8Z,11Z,14Z)/22:2(13Z,16Z))	-	M+H, M+K	C48H83O10P	9.9982	pos	-	851.577	-3.37941
Stigmastentriol	-	M+H-H2O, M+H	C29H50O3	10.0662	pos	Steroids and steroid derivatives	429.372	-2.62451
1,4,6-Trimethylnaphthalene	-	M+H, M+CH3OH+H	C13H14	3.7729	pos	-	171.116	-2.34033
PC(18:2(9Z,12Z)/20:4(8Z,11Z,14Z,17Z))	-	M+H, M+Na	C46H80NO8P	10.1794	pos	Glycerophospholipids	806.57	1.12925
PC(18:1(11Z)/18:3(9Z,12Z,15Z))	-	M+H, M+Na	C44H80NO8P	10.3617	pos	Glycerophospholipids	782.567	-2.97351
PC(16:0/18:3(6Z,9Z,12Z))	-	M+H, M+K	C42H78NO8P	10.3844	pos	Glycerophospholipids	756.551	-3.10808
PE(16:1(5Z)/16:1(5Z))	-	M+H, M+Na	C37H70NO8P	10.3994	pos	-	688.49	-2.33594
Uralsaponin B	-	M+H, M+Na	C42H62O16	10.3994	pos	Prenol lipids	845.395	5.33396
DG(20:0/22:5(7Z,10Z,13Z,16Z,19Z)/0:0)	-	M+H, M+Na	C45H78O5	10.6578	pos	Glycerolipids	721.575	1.78084
Cer(d14:1(4E)/20:0(2OH))	-	M+H, M+Na	C34H67NO4	10.8022	pos	-	576.496	-2.43544
PC(15:0/20:2(11Z,14Z))	-	M+H, M+Na	C43H82NO8P	10.9469	pos	Glycerophospholipids	772.584	-1.57315
DG(14:0/20:3(5Z,8Z,11Z)/0:0)	-	M+Na, M+K	C37H66O5	11.1603	pos	Glycerolipids	613.479	-2.14037
PGP(16:0/20:4(5Z,8Z,11Z,14Z))	-	M+H-2H2O, M+CH3OH+H	C42H76O13P2	11.1831	pos	Glycerophospholipids	815.466	4.27477
PI(18:4(6Z,9Z,12Z,15Z)/20:0)	-	M+H, M+Na	C47H83O13P	11.3196	pos	-	887.566	1.29584
Cer(d16:1(4E)/20:0(2OH))	-	M+H, M+Na	C36H71NO4	11.3425	pos	-	604.526	-2.3339
(R)-Apiumetin glucoside	-	M+H-H2O, M+Na	C20H22O9	3.601	pos	Coumarins and derivatives	389.122	-2.93522
(R)-Shinanolone	-	M+H-H2O, M+CH3OH+H	C11H12O3	3.347	pos	Tetralins	175.075	-1.91438
Isosafrole	-	M+H-H2O, M+H	C10H10O2	3.347	pos	-	163.075	-2.03605
Dictyoquinazol C	-	M+H, M+CH3OH+H	C18H18N2O5	3.2426	pos	Diazanaphthalenes	343.128	-1.58137
Columbin	-	M+H-H2O, M+CH3OH+H	C20H22O6	3.1307	pos	-	341.137	-2.53004
Gravolenic acid	-	M+H-H2O, M+H	C14H16O6	3.1233	pos	Cinnamic acids and derivatives	263.091	-2.53617
Isoquinoline	-	M+H, 2M+K	C9H7N	3.1084	pos	Isoquinolines and derivatives	130.065	-1.5334
6-Acetyl-2,3-dihydro-2-(hydroxymethyl)-4(1H)-pyridinone	-	M+H-H2O, M+H	C8H11NO3	3.0339	pos	Pyridines and derivatives	152.07	-2.03758
Propioveratrone	-	M+H, M+CH3OH+H	C11H14O3	2.7805	pos	-	195.101	-1.58941
Limonene-1,2-epoxide	Limonene and pinene degradation	M+H-H2O, M+H	C10H16O	2.7805	pos	-	135.117	-1.90044
Splitomicin	-	M+H-H2O, M+H	C13H10O2	2.7432	pos	-	199.075	-2.48306
6-[3-(2H-1,3-benzodioxol-5-yl)oxiran-2-yl]-4-methoxy-5,6-dihydro-2H-pyran-2-one	-	M+H-H2O, M+H	C15H14O6	2.6912	pos	Benzodioxoles	291.085	-2.71373
1,3,5-TRIMETHOXYBENZENE	-	M+H, M+CH3OH+H	C9H12O3	2.6688	pos	Phenol ethers	169.085	-2.61541
Furfuryl acetate	-	M+H-2H2O, M+ACN+Na	C7H8O3	2.6539	pos	Heteroaromatic compounds	204.065	0.718938
(1S,2S,4S,5S)-2,4,7-Thujanetriol 4-glucoside	-	M+NH4, M+Na	C16H28O8	2.6389	pos	Prenol lipids	371.167	-2.57176
2-amino-8-oxo-9,10-epoxy-decanoic acid	-	M+H-H2O, M+H	C10H17NO4	2.6389	pos	-	216.123	-1.39907
(1R,4R,5S)-5-Hydroxyfenchone glucoside	-	M+H, M+NH4	C16H26O7	2.557	pos	Prenol lipids	331.174	-3.93622
5-Deoxodihydrokalafungin	-	M+H-H2O, M+H	C16H16O5	2.5347	pos	-	271.096	-2.94659
Methyl salicylate O-[rhamnosyl-(1->6)-glucoside]	-	M+NH4, M+CH3OH+H	C20H28O12	2.378	pos	Organooxygen compounds	493.188	-2.04286
Vestitone 7-glucoside	-	M+H-H2O, M+K	C22H26O9	2.3406	pos	Isoflavonoids	417.153	-2.83365
Cyclic N-Acetylserotonin glucuronide	-	M+H-H2O, M+H	C18H20N2O8	2.1543	pos	Organooxygen compounds	393.128	-2.77087
Riboflavin (Vitamin B2)	-	M+H-H2O, M+H	C17H20N4O6	2.1543	pos	-	377.145	-5.88647
LEVULINIC ACID, 3-BENZYLIDENYL-	-	M+H-H2O, M+H	C12H12O3	2.1244	pos	-	187.075	-1.89692
Methyl phenylacetate	-	M+H, 2M+K	C9H10O2	2.1095	pos	Benzene and substituted derivatives	151.075	-1.9595
2-hydroxyoct-2-enoylglycine	-	M+H-2H2O, M+2Na-H	C10H17NO4	2.0571	pos	Carboxylic acids and derivatives	180.102	-1.58795
5-(3',4'-Dihydroxyphenyl)-gamma-valerolactone	-	M+NH4, M+CH3OH+H	C11H12O4	1.6699	pos	Phenols	226.107	-2.55059
P-cresol	Metabolic pathways	M+H-H2O, M+H	C7H8O	1.6178	pos	Phenols	109.065	1.69981
N-Acetyl-6-O-L-fucosyl-D-glucosamine	-	M+H-2H2O, M+H	C14H25NO10	1.5806	pos	Fatty Acyls	332.133	-2.72404
D-Pantothenoyl-L-cysteine	Pantothenate and CoA biosynthesis	M+H+Na, M+ACN+H	C12H22N2O6S	1.5731	pos	Peptidomimetics	364.149	7.74284
2-Amino-1-(2-phenoxyethyl)-3-[2-(1-piperidiniumyl)ethyl]-1H-benzimidazol-3-ium	-	M+CH3OH+H	C6H12N2O	0.5355	pos	-	161.128	-2.59282
N-Acetylprocainamide	-	M+2Na-H	C15H23N3O2	0.5801	pos	Benzene and substituted derivatives	322.149	-4.94487
2',3',4'-Trihydroxyacetophenone	-	M+H	C8H8O4	0.6021	pos	-	169.049	-2.69407
Beta-D-Fructofuranosyl alpha-D-glucopyranosyl-(1->4)-D-glucopyranoside	-	M+NH4	C18H32O16	0.6021	pos	Organooxygen compounds	522.202	-2.49123
(S)-2,3,4,5-Tetrahydropiperidine-2-carboxylate	-	M+H-2H2O	C6H9NO2	0.6094	pos	Carboxylic acids and derivatives	92.0497	1.90035
Niacinamide	Metabolic pathways;Nicotinate and nicotinamide metabolism	M+H	C6H6N2O	0.6094	pos	Pyridines and derivatives	123.055	-0.257466
Tetraethylene glycol	-	M+ACN+H	C8H18O5	0.624	pos	Organooxygen compounds	236.149	-2.98339
5-Acetamidopentanoic acid	Lysine degradation	M+H-H2O	C7H13NO3	0.6315	pos	Fatty Acyls	142.086	-1.55012
N-Butyrylhomoserine	-	M+ACN+H	C8H15NO4	0.6315	pos	-	231.133	-3.0545
N-Acetyl-D-mannosaminolactone	-	M+H	C8H13NO6	0.6385	pos	-	220.081	-2.71358
FRAXETIN	-	M+H	C10H8O5	0.6606	pos	-	209.044	-2.24982
Cis-4-Carboxymethylenebut-2-en-4-olide	-	M+H	C6H4O4	0.6681	pos	Dihydrofurans	141.018	-1.3581
Dimethyl sulfoxide	Sulfur metabolism	M+H	C2H6OS	0.698	pos	Sulfoxides	79.0216	4.62817
Propionic acid	Metabolic pathways;Propanoate metabolism;Nicotinate and nicotinamide metabolism	2M+K	C3H6O2	0.7129	pos	Carboxylic acids and derivatives	187.036	-2.58382
ACPC	Metabolic pathways;Cysteine and methionine metabolism;Biosynthesis of secondary metabolites	M+H-H2O	C4H7NO2	0.7204	pos	-	84.0447	3.11248
Adenine	Metabolic pathways;Purine metabolism;Zeatin biosynthesis	M+H	C5H5N5	0.8629	pos	Imidazopyrimidines	136.062	-1.70932
2,2,4,4,-Tetramethyl-6-(1-oxopropyl)-1,3,5-cyclohexanetrione	-	M+ACN+Na	C13H18O4	0.8629	pos	Prenol lipids	302.134	-9.49758
Isonicotinic acid	-	M+H	C6H5NO2	0.8703	pos	Pyridines and derivatives	124.039	-0.849165
Deidaclin	-	M+H-H2O	C12H17NO6	0.8703	pos	-	254.102	-2.24268
7,8-Dihydrobiopterin	-	M+H	C9H13N5O3	0.8928	pos	-	240.109	-2.0476
D-Pipecolic acid	-	M+H	C6H11NO2	0.9003	pos	Carboxylic acids and derivatives	130.086	-1.31895
Alpha-Allokainic acid	-	M+NH4	C10H15NO4	0.9226	pos	-	231.133	-2.59878
LINUSTATIN	-	M+H-2H2O	C16H27NO11	0.9376	pos	-	374.144	-2.20923
N-Acetylgalactosaminate	-	M+H	C8H13NO7	0.975	pos	-	236.076	-1.75426
Ascopyrone M	-	M+ACN+H	C6H8O4	0.9825	pos	-	186.076	-2.00465
1-O-(4-coumaroyl)-beta-D-glucose	-	M+NH4	C15H18O8	0.9975	pos	-	344.133	-2.16099
Bk-MDEA	-	M+H	C12H15NO3	1.0049	pos	-	222.112	-2.25321
Piperidine	Tropane, piperidine and pyridine alkaloid biosynthesis	M+H	C5H11N	1.0198	pos	Piperidines	86.0967	2.87109
5'-Deoxyadenosine	-	M+H	C10H13N5O3	1.0198	pos	5'-deoxyribonucleosides	252.109	-2.08245
N-Fructosyl isoleucine	-	M+H	C12H23NO7	1.0198	pos	-	294.154	-2.48028
N-Benzyloxycarbonylglycine	-	M+H	C10H11NO4	1.0569	pos	-	210.076	-1.11711
Gynocardin	-	M+ACN+H	C12H17NO8	1.0644	pos	Organooxygen compounds	345.128	-2.90333
5-amino-5-deoxy-3-dehydroshikimic acid	-	M+ACN+H	C7H9NO4	1.0795	pos	-	213.087	-2.35793
XT1925000	-	M+CH3OH+H	C7H6N2O4	1.102	pos	-	215.066	-2.7583
Acetylhomoserine	-	M+CH3OH+H	C6H11NO4	1.1094	pos	Carboxylic acids and derivatives	194.103	5.8129
(+/-)-Asarinol B	-	M+H-H2O	C10H14O3	1.1169	pos	-	165.091	-1.66289
(±)-Propionylcarnitine	-	M+H	C10H19NO4	1.1543	pos	-	218.138	-1.90071
2-methoxy-4-[(oxiran-2-yl)methyl]phenol	-	M+ACN+H	C10H12O3	1.1543	pos	Phenols	222.112	-2.71289
2,2-Dimethyloxirane	-	M+H	C4H8O	1.2449	pos	Epoxides	73.0652	5.6197
3-O-Methylgallate	-	M+H	C8H8O5	1.2749	pos	-	185.044	-2.13938
N-(1-Deoxy-1-fructosyl)alanine	-	M+Na	C9H17NO7	1.3271	pos	Organooxygen compounds	274.091	5.28864
Ethyl 2-hydroxy-3-(3-indolyl)propanoate glucoside	-	M+CH3OH+H	C19H25NO8	1.3346	pos	Fatty Acyls	428.191	-2.26559
2,4-Dihydroxybenzoic acid	Metabolic pathways;Phenylalanine, tyrosine and tryptophan biosynthesis;Biosynthesis of secondary metabolites	M+H	C7H6O4	1.3496	pos	Benzene and substituted derivatives	155.034	-2.06308
7,8-Dihydroneopterin	Metabolic pathways;Folate biosynthesis	M+H-2H2O	C9H13N5O4	1.3496	pos	Pteridines and derivatives	220.084	4.18517
R-(-)-Mandelic acid	-	M+H-H2O	C8H8O3	1.3794	pos	-	135.044	-1.64033
O-Acetyl-L-homoserine	Metabolic pathways;Cysteine and methionine metabolism	M+H-2H2O	C6H11NO4	1.3944	pos	-	126.055	-0.716104
Arginyl-Hydroxyproline	-	M+H-H2O	C11H21N5O4	1.3944	pos	Carboxylic acids and derivatives	270.154	-7.16183
5-Hydroxymethyl-2-furaldehyde	-	M+H	C6H6O3	1.4168	pos	-	127.039	-1.27219
Benzaldehyde	-	M+H	C7H6O	1.4391	pos	Benzene and substituted derivatives	107.049	0.639659
Phenylacetylglycine	Phenylalanine metabolism	M+ACN+H	C10H11NO3	1.4391	pos	Carboxylic acids and derivatives	235.107	-2.22938
P-coumaroylputrescine	Arginine and proline metabolism	M+CH3OH+H	C13H18N2O2	1.4391	pos	-	267.17	-2.54465
(S)-3-[(Cyanophenylmethyl)amino]-3-oxopropanoic acid	-	M+H	C11H10N2O3	1.4464	pos	Benzene and substituted derivatives	219.076	-2.02896
Succinoadenosine	-	M+H	C14H17N5O8	1.4611	pos	-	384.114	-1.58099
Trypanothione disulfide	Metabolic pathways;Glutathione metabolism	M+H	C27H47N9O10S2	1.4611	pos	Carboxylic acids and derivatives	722.299	3.66959
Suberic acid	-	M+ACN+H	C8H14O4	1.4685	pos	Fatty Acyls	216.123	-2.41745
Alpha-methylphenylalanine	-	M+H	C10H13NO2	1.4835	pos	Phenylpropanoic acids	180.102	-2.18476
Kievitol	-	M+ACN+Na	C20H22O7	1.4835	pos	Isoflavonoids	438.153	1.82097
Diethylpropion(metabolite VIII-glucuronide)	-	M+H	C15H19NO8	1.5059	pos	-	342.117	-3.36751
Furfural	-	M+H	C5H4O2	1.5432	pos	-	97.0286	1.68623
2-Hydroxymuconate semialdehyde	Metabolic pathways	M+H-H2O	C6H6O4	1.5432	pos	-	125.023	-1.22516
5-Acetyl-2,3-dihydro-6,7-dimethyl-1H-pyrrolizine	-	M+H	C11H15NO	1.5731	pos	Pyrrolizines	178.122	-2.24695
Tyramine	Isoquinoline alkaloid biosynthesis;Biosynthesis of secondary metabolites;Tyrosine metabolism	M+H	C8H11NO	1.5806	pos	Benzene and substituted derivatives	138.091	-2.07024
GY5825500	-	M+H-H2O	C16H22O11	1.6178	pos	-	373.112	-2.61974
Safflomin A	-	2M+3H2O+2H	C27H32O16	1.6326	pos	Cinnamic acids and derivatives	626.178	-4.0981
N-butylformamide	-	M+K	C5H11NO	1.6848	pos	Carboxylic acids and derivatives	140.046	-7.50481
2-oxohex-4-enoic acid	-	M+H	C6H8O3	1.6998	pos	-	129.055	-0.777708
Benzyl (2R,3S)-3-hydroxy-2-methylbutanoate	-	M+ACN+H	C12H16O3	1.7147	pos	-	250.143	-2.2671
Indole	Metabolic pathways;Benzoxazinoid biosynthesis;Phenylalanine, tyrosine and tryptophan biosynthesis;Biosynthesis of secondary metabolites;Tryptophan metabolism	M+H	C8H7N	1.7221	pos	Indoles and derivatives	118.065	-0.730988
Serotonin	Metabolic pathways;Tryptophan metabolism	M+H-H2O	C10H12N2O	1.7221	pos	Indoles and derivatives	159.091	-2.06494
3,4-dihydroxyphenylpyruvic acid	-	M+H-H2O	C9H8O5	1.7444	pos	-	179.033	-2.09139
1,8-Diazacyclotetradecane-2,9-dione	-	M+H	C12H22N2O2	1.7444	pos	-	227.175	-2.48619
4-coumaroylshikimic acid	-	M+CH3OH+H	C16H16O7	1.7888	pos	-	353.122	-2.25982
Caryoptosidic acid	-	M+NH4	C16H24O11	1.8331	pos	Prenol lipids	410.163	-7.5669
Cyanidin 3-(2G-xylosylrutinoside)	-	M+CH3OH+H	C32H39O19+	1.863	pos	Flavonoids	760.243	1.05136
1-piperideine-6-carboxylic acid	-	M+H-2H2O	C6H9NO2	1.9004	pos	-	92.0497	1.66352
6-Deoxy-2,3-di-O-methyl-D-allopyranose	-	M+ACN+H	C8H16O5	1.9153	pos	-	234.133	-2.3793
6-(4-ethyl-5-hydroxy-2-methoxyphenoxy)-3,4,5-trihydroxyoxane-2-carboxylic acid	-	M+H-H2O	C15H20O9	1.9228	pos	Organooxygen compounds	327.104	-8.87214
Delta-Decalactone	-	M+H	C10H18O2	1.96	pos	Lactones	171.138	-1.76486
3-Hydroxy-2-methylglutarate	-	M+ACN+H	C7H12O5	1.96	pos	Fatty Acyls	218.102	-2.11261
4-(2-Aminophenyl)-2,4-dioxobutanoic acid	Metabolic pathways;Tryptophan metabolism	M+H-H2O	C10H9NO4	1.9749	pos	Organooxygen compounds	190.049	-2.39027
Methionyl-Phenylalanine	-	2M+ACN+H	C14H20N2O3S	2.0347	pos	Carboxylic acids and derivatives	634.269	-5.96525
2,6-DIHYDROXY-4-METHOXYTOLUENE	-	M+H	C8H10O3	2.0571	pos	-	155.07	-1.96621
(-)-Menthone	Biosynthesis of secondary metabolites;Monoterpenoid biosynthesis	M+H	C10H18O	2.102	pos	Prenol lipids	155.143	-2.25031
3-METHYLORSELLINIC ACID	-	M+H	C9H10O4	2.102	pos	-	183.065	-1.8413
Koenoline	-	M+ACN+H	C14H13NO2	2.102	pos	Indoles and derivatives	269.128	-2.63886
Gardenoside	-	M+Na	C17H24O11	2.1095	pos	-	427.12	-2.43968
Loxoprofen	-	M+NH4	C15H18O3	2.1394	pos	Phenylpropanoic acids	264.159	-2.7428
Nigellimine N-oxide	-	M+H	C12H13NO3	2.1469	pos	Carboxylic acids and derivatives	220.097	-1.42262
Cysteinyl-Serine	-	M+ACN+Na	C6H12N2O4S	2.1766	pos	Carboxylic acids and derivatives	272.068	0.888796
Dopaquinone	Metabolic pathways;Betalain biosynthesis;Tyrosine metabolism	M+CH3OH+H	C9H9NO4	2.2063	pos	Carboxylic acids and derivatives	228.086	-1.73798
Ciramadol	-	M+CH3OH+H	C15H23NO2	2.2436	pos	-	282.206	-2.94507
(1S,2R)-3-Methyl-3,5-cyclohexadiene-1,2-diol	-	M+H-2H2O	C7H10O2	2.2585	pos	-	91.0544	1.49722
Isoferulic acid	-	M+H	C10H10O4	2.2734	pos	Cinnamic acids and derivatives	195.065	-2.31792
9-Carboxymethoxymethylguanine	-	M+Na	C8H9N5O4	2.4079	pos	Imidazopyrimidines	262.053	-8.6568
Phenylacetylglycine methyl ester	-	M+H	C11H13NO3	2.4154	pos	-	208.096	-2.05931
(R)-(-)-6-methoxymellein	-	M+CH3OH+H	C11H12O4	2.4823	pos	-	241.106	-3.11591
(+)-8'-hydroxyabscisic acid	-	M+ACN+H	C15H20O5	2.4898	pos	-	322.164	-2.78022
Butyl butyryllactate	-	M+ACN+H	C11H20O4	2.4973	pos	Fatty Acyls	258.169	-2.88226
2,5-Dimethyl-1H-pyrrole	-	M+H	C6H9N	2.5122	pos	Pyrroles	96.0809	1.74457
(3S)-3-Hydroxycyclocitral	-	M+H	C10H16O2	2.557	pos	-	169.122	-2.1198
Phenylpropanol	-	M+H-H2O	C9H12O	2.5719	pos	-	119.085	-0.637794
4-Hydroxypheoxyacetate	-	M+H	C8H8O4	2.5719	pos	-	169.049	-1.8023
4,4'-Dihydroxybiphenyl	-	M+H	C12H10O2	2.609	pos	-	187.075	-1.95694
4-Hydroxy-4-methyl-7-decenoic acid gamma-lactone	-	M+H	C11H18O2	2.624	pos	Lactones	183.138	-1.9116
5-Methylcytidine	-	2M+ACN+H	C10H15N3O5	2.6464	pos	Pyrimidine nucleosides	556.238	2.76991
D-Pantothenic acid	Metabolic pathways;Biosynthesis of secondary metabolites;Pantothenate and CoA biosynthesis;beta-Alanine metabolism	M+H-2H2O	C9H17NO5	2.6539	pos	-	184.097	-1.41464
2-Acetyl-3-methylfuran	-	M+H-2H2O	C7H8O2	2.6912	pos	Organooxygen compounds	89.0388	1.6839
6''-Acetylapiin	-	M+NH4	C28H30O15	2.7283	pos	Flavonoids	624.191	-2.51106
4-Hydroxy-2H-pyran-3-carboxaldehyde	-	M+H	C6H6O3	2.7506	pos	Pyrans	127.039	-1.40704
(E)-2,6-Dimethyl-2,5-heptadienoic acid	-	M+H	C9H14O2	2.8326	pos	Fatty Acyls	155.106	-2.44036
4,6-heptadienal	-	M+H	C7H10O	2.8475	pos	-	111.08	-0.0269101
4-Oxocyclohexanecarboxylic acid	-	M+H-H2O	C7H10O3	2.9443	pos	-	125.06	-1.05261
(4S)-7-Hydroxy-4-isopropenyl-7-methyl-2-oxepanone	-	M+H-H2O	C10H16O3	2.9443	pos	-	167.106	-2.20902
Artabsinolide D	-	M+H	C15H22O5	2.9443	pos	Lactones	283.153	-3.09676
(10S,11S)-Pterosin C	-	M+H	C14H18O3	2.9891	pos	Indanes	235.132	-2.36545
Chitobiose	Metabolic pathways;Amino sugar and nucleotide sugar metabolism;ABC transporters	M+NH4	C15H26N2O12	3.0636	pos	Organooxygen compounds	444.185	6.47838
16beta-16-Hydroxy-3-oxo-1,12-oleanadien-28-oic acid	-	M+H	C30H44O4	3.1457	pos	Prenol lipids	469.33	-2.7194
Mycotoxin T 2	-	M+CH3OH+H	C16H23NO7	3.1979	pos	Organooxygen compounds	374.18	-3.81969
(Z)-2-Methyl-2-butene-1,4-diol 4-O-beta-D-Glucopyranoside	-	M+ACN+Na	C11H20O7	3.2053	pos	Fatty Acyls	328.138	4.82552
Judeol	-	M+K	C23H30O7	3.2128	pos	Prenol lipids	457.166	9.78058
Taraxinic acid glucosyl ester	-	M+ACN+H	C21H28O9	3.2874	pos	Prenol lipids	466.206	-2.50286
Koeniginequinone A	-	M+2Na-H	C14H11NO3	3.3023	pos	Indoles and derivatives	286.046	5.03667
C9:2n-5,7	-	M+H	C9H14O2	3.3619	pos	-	155.106	-2.4134
7-hydroxy-coumarin	Biosynthesis of secondary metabolites	M+ACN+H	C9H6O3	3.459	pos	-	204.065	-2.50302
4-(3-Hydroxy-7-phenyl-6-heptenyl)-1,2-benzenediol	-	M+H	C19H22O3	3.5263	pos	Diarylheptanoids	299.163	-2.73503
3,6-dihydroxy-4,5-diphenyl-2,3,4,5-tetrahydropyridin-2-one	-	M+ACN+H	C17H15NO3	3.5263	pos	Stilbenes	323.138	-4.22979
7-Tridecynoic acid	-	M+H	C13H22O2	3.5487	pos	-	211.169	-2.43574
Triethyl phosphate	-	M+H	C6H15O4P	3.5861	pos	-	183.078	-2.28297
P-Mentha-1,3,5,8-tetraene	-	M+H	C10H12	3.6084	pos	Benzene and substituted derivatives	133.101	-2.06708
Ustiloxin B	-	M+NH4	C26H39N5O12S	3.6084	pos	Fatty Acyls	663.264	-1.97811
Gibberellin A38 glucosyl ester	-	M+H	C26H36O11	3.728	pos	Prenol lipids	525.229	-7.17726
Myristicanol A	-	M+H	C23H30O8	3.7504	pos	Not Available	435.199	-6.10333
4-Phenethylphenol	-	M+H	C14H14O	3.7729	pos	-	199.111	-2.15981
3'-Hydroxy-HT2 toxin	-	M+2Na-H	C22H32O9	3.8403	pos	Prenol lipids	485.179	7.52618
(Z)-alpha-Bergamotenoic acid	-	M+H	C15H22O2	3.8928	pos	Prenol lipids	235.169	-2.56187
Hv-NCC-1	-	M+H-2H2O	C35H42N4O10	3.9003	pos	Tetrapyrroles and derivatives	643.276	-1.02643
Dendrobane A	-	M+H	C15H24O3	3.9302	pos	-	253.179	-2.89365
(6E,8E,12E,14E)-hexadeca-6,8,12,14-tetraen-10-ynoic acid	-	M+H	C16H20O2	3.9451	pos	-	245.153	-2.68896
(Z)-3-(2,4,5-Trimethoxyphenyl)-2-propenal	-	M+H	C12H14O4	3.9526	pos	Cinnamaldehydes	223.096	-2.65049
Dihydroxycarbazepine	-	M+CH3OH+H	C15H14N2O3	4.0571	pos	-	303.133	-3.29688
1-(4'-Hydroxyphenyl)ethanol	-	M+H	C8H10O2	4.1395	pos	-	139.075	-2.28276
Acutilol A	-	M+H	C20H32O2	4.1995	pos	-	305.247	-2.61609
Reduced-(S)-usnate	-	M+H-H2O	C18H18O7	4.1995	pos	-	329.101	-2.64459
4-Hydroxy-3-prenylbenzoic acid glucoside	-	M+2Na-H	C18H24O8	4.2295	pos	Organooxygen compounds	413.12	5.8929
3,3',4,5'-Tetrahydroxy-trans-stilbene	-	M+H	C14H12O4	4.237	pos	-	245.08	-2.37427
Hydroxynalidixic acid	-	M+Na	C12H12N2O4	4.372	pos	Diazanaphthalenes	271.07	6.32102
4-Formylsalicylic acid	-	M+H	C8H6O4	4.4097	pos	-	167.033	-2.32251
7alpha-Hydroxydehydrocostus lactone	-	M+H-H2O	C15H18O3	4.4322	pos	-	229.122	-1.98511
Apigenin	Metabolic pathways;Isoflavonoid biosynthesis;Flavonoid biosynthesis;Biosynthesis of secondary metabolites;Flavone and flavonol biosynthesis	M+H	C15H10O5	4.4773	pos	Flavonoids	271.059	-3.24025
12-Nitro-9Z,12Z-octadecadienoic acid	-	M+H-2H2O	C18H31NO4	4.5227	pos	-	290.211	-2.47707
L-Agaridoxin	-	2M+K	C11H14N2O5	4.5679	pos	Carboxylic acids and derivatives	547.143	-0.498142
1-Naphthylmethanol	-	M+H-H2O	C11H10O	4.6282	pos	-	141.07	-1.98058
N-[[3-Hydroxy-2-(2-pentenyl)cyclopentyl]acetyl]isoleucine	-	M+H	C18H31NO4	4.6582	pos	Carboxylic acids and derivatives	326.232	-2.81168
Carvone	Biosynthesis of secondary metabolites;Limonene and pinene degradation;Monoterpenoid biosynthesis	M+H	C10H14O	4.6883	pos	Prenol lipids	151.111	-2.25109
Prostaglandin E2 p-benzamidophenyl ester	-	M+H	C33H41NO6	4.6883	pos	-	548.297	-6.987
Cyclopassifloside X	-	M+H-H2O	C37H62O12	4.6883	pos	2-arylbenzofuran flavonoids	681.416	-6.46738
7,8-Dihydrovomifoliol 9-[rhamnosyl-(1->6)-glucoside]	-	M+2Na-H	C25H42O12	4.7332	pos	Fatty Acyls	579.24	1.74436
Hydroxyprolyl-Proline	-	2M+K	C10H16N2O4	4.8307	pos	Carboxylic acids and derivatives	495.184	-3.58526
Castaneiolide	-	M+2Na-H	C22H28O8	4.8683	pos	Fatty Acyls	465.151	3.38918
Chrysin	Flavonoid biosynthesis	M+H	C15H10O4	4.8834	pos	-	255.064	-2.80308
Estradiol acetate glucuronide	-	M+NH4	C26H34O9	4.8834	pos	Steroids and steroid derivatives	508.25	-7.41489
Dehydroabietic acid	-	M+H	C20H28O2	4.9135	pos	Prenol lipids	301.215	-2.94251
Premithramycin A1	-	M+Na	C27H28O12	4.921	pos	-	567.148	1.41429
[(R)-2,2,3-trimethyl-5-oxocyclopent-3-en-1-yl]acetic acid	-	M+H-2H2O	C10H14O3	4.9435	pos	-	147.08	-2.00637
5E,8Z,11Z,14Z,16Z-eicosapentaenoic acid	-	M+H	C20H30O2	5.0033	pos	-	303.231	-2.89981
(S,E)-Zearalenone	-	M+NH4	C18H22O5	5.0182	pos	Macrolides and analogues	336.18	-2.6915
Chitin	Metabolic pathways;Amino sugar and nucleotide sugar metabolism	M+ACN+Na	C16H28N2O11.[C8H13NO5]n	5.0552	pos	Organooxygen compounds	691.259	-8.03436
Agavasaponin C	-	M+H-2H2O	C45H72O19	5.0552	pos	Steroids and steroid derivatives	881.45	-3.65139
D-erythro-Eritadenine	-	M+ACN+H	C9H11N5O4	5.0776	pos	Prenol lipids	295.114	-2.09581
15-Octadecene-9,11,13-triynoic acid	-	M+H	C15H18O2	5.1002	pos	Fatty Acyls	231.137	-2.47811
Cytidine monophosphate	Pyrimidine metabolism;Metabolic pathways	M+Na	C9H14N3O8P	5.1152	pos	Pyrimidine nucleotides	346.044	7.73383
Senecionine	Tropane, piperidine and pyridine alkaloid biosynthesis;Biosynthesis of secondary metabolites	M+H	C18H25NO5	5.153	pos	-	336.18	-3.05738
Pterosin E	-	M+H	C14H16O3	5.1681	pos	Indanes	233.117	-2.5356
Gluten exorphin B5	-	M+H-H2O	C30H38N6O11	5.1681	pos	Carboxylic acids and derivatives	641.259	3.21773
Sambacin	-	M+H-2H2O	C26H36O12	5.1982	pos	Organooxygen compounds	505.203	-6.55644
3,4,5-trihydroxy-6-[4-(4-methyl-3-oxopentyl)phenoxy]oxane-2-carboxylic acid	-	M+Na	C18H24O8	5.2132	pos	Organooxygen compounds	391.135	-2.63472
Prednisolone tebutate	-	M+H	C27H38O6	5.2132	pos	-	459.273	-2.69272
Isosilybin	-	M+H-H2O	C25H22O10	5.2207	pos	Flavonolignans	465.117	-2.23149
Kolaflavanone	-	M+CH3OH+H	C31H24O12	5.2283	pos	-	621.159	-2.1514
Senecivernine	-	M+Na	C18H25NO5	5.2508	pos	-	358.164	4.39824
Phenylalanyl-Serine	-	2M+K	C12H16N2O4	5.2508	pos	Carboxylic acids and derivatives	543.182	-6.14083
Hydroxypropyl cellulose	-	M+H-2H2O	C20H38O15.[C8H14O6]n	5.2735	pos	Organooxygen compounds	689.28	-8.62473
Estrone-2,3-quinone	-	2M+H	C18H20O3	5.2961	pos	Steroids and steroid derivatives	569.291	2.79432
(1E,6R,7R,8S)-6,7-Dihydroxy-8-isopropyl-5-methylene-1-cyclodecene-1-carbaldehyde	-	M+Na	C15H24O3	5.3112	pos	-	275.161	-2.44311
Beta-Solanine	-	M+K	C39H63NO11	5.3413	pos	Steroids and steroid derivatives	760.409	8.06269
Glucozaluzanin C	-	M+Na	C21H28O8	5.3639	pos	-	431.167	-2.64422
(5-butyl-6-methyloctahydroindolizin-8-yl)methanol	-	M+H	C14H27NO	5.3715	pos	-	226.216	-2.69102
Curcolone	-	M+H	C15H18O3	5.4169	pos	Prenol lipids	247.132	-2.58062
5-NITRO-2-PHENYLPROPYLAMINOBENZOIC ACID [NPPB]	-	M+H	C16H16N2O4	5.4169	pos	-	301.118	-2.44257
Bisbynin	-	2M+H	C15H22O5	5.4622	pos	Pyrans	565.297	-6.63443
Octadecanedioic acid	-	M+NH4	C18H34O4	5.5	pos	Fatty Acyls	332.279	-2.76351
Quercetin 3-(6'''-p-coumarylglucosyl)(1->2)-rhamnoside 7-glucoside	-	M+H	C42H46O23	5.5151	pos	Flavonoids	919.242	-9.28204
Longifolenaldehyde	-	M+H	C15H24O	5.5301	pos	-	221.189	-2.49546
6-Methoxytaxifolin	-	M+H-2H2O	C16H14O8	5.5526	pos	-	299.054	-2.36979
Methyl beta-naphthyl ketone	-	M+ACN+Na	C12H10O	5.5901	pos	Naphthalenes	234.088	-3.08839
5-Butyl-2-furanoctanoic acid	-	M+H-2H2O	C16H26O3	5.6051	pos	Fatty Acyls	231.174	-1.52524
N'-Hydroxymethylnorcotinine	-	2M+3H2O+2H	C10H12N2O2	5.6125	pos	Pyridines and derivatives	206.101	-2.41406
5b-estran-3a,17b-diol	-	M+H-H2O	C18H30O2	5.6351	pos	-	261.221	-2.23986
Chamissonin	-	M+H-H2O	C15H20O4	5.6503	pos	-	247.132	-2.52602
PGE3 1,15-lactone	-	M+H	C20H28O4	5.6578	pos	-	333.203	-9.72709
Tangeritin	-	M+H	C20H20O7	5.673	pos	Flavonoids	373.127	-2.74236
N-Caffeoyltryptophan	-	M+2Na-H	C20H18N2O5	5.6805	pos	Carboxylic acids and derivatives	411.091	-4.96907
3alpha-HYDROXY-4,4-BISNOR-8,11,13-PODOCARPATRIENE	-	M+H	C15H20O	5.6955	pos	-	217.158	-2.28921
Alpha-Amylcinnamyl acetate	-	M+H-2H2O	C16H22O2	5.9671	pos	Benzene and substituted derivatives	211.148	-1.60119
10E,12E-tetradecadiene-4,6-diynoic acid	-	M+H	C14H16O2	5.9747	pos	-	217.122	-2.20609
(R)-8-Acetoxycarvotanacetone	-	M+2Na-H	C12H18O3	5.9747	pos	Prenol lipids	255.098	8.24012
Homoanserine	-	2M+H	C11H18N4O3	5.9898	pos	Peptidomimetics	509.287	7.57121
2-Hydroxyestrone	-	M+H-2H2O	C18H22O3	6.0049	pos	Steroids and steroid derivatives	251.143	-1.83782
1-Caffeoyl-beta-D-glucose	-	M+H-H2O	C15H18O9	6.0578	pos	-	325.091	-3.01939
Avocadene	-	M+NH4	C17H34O3	6.1032	pos	Fatty Acyls	304.284	-2.57565
Sirenin	-	M+ACN+H	C15H24O2	6.2015	pos	-	278.212	0.636681
3-Hydroxydodecanedioic acid	-	M+H-H2O	C12H22O5	6.262	pos	Hydroxy acids and derivatives	229.143	-1.7267
Glycol stearate	-	M+NH4	C20H40O3	6.2847	pos	-	346.331	-3.11328
Kudzusaponin SA2	-	M+2H	C47H76O19	6.3146	pos	Prenol lipids	473.253	-6.42775
2-hexaprenyl-5-hydroxy-6-methoxy-3-methyl-1,4-benzoquinone	-	M+Na	C38H56O4	6.3146	pos	-	599.408	1.76581
5beta-scymnol	-	M+Na	C27H48O6	6.3296	pos	-	491.336	2.79317
2-Hydroxyacorenone	-	M+ACN+H	C15H24O2	6.3371	pos	Organooxygen compounds	278.211	-1.55848
(25S)-Spirostane-3b,5b,6a-triol 3-[4''-rhamnosylglucoside]	-	M+2Na	C39H64O14	6.3446	pos	Steroids and steroid derivatives	401.2	-9.84595
Diphenylamine	-	M+H	C12H11N	6.3898	pos	Benzene and substituted derivatives	170.096	-2.57424
14-Dihydroxycornestin	-	M+H-2H2O	C16H20O6	6.3973	pos	-	273.111	-2.31486
Goldinodox	-	M+H	C44H62N2O12	6.3973	pos	Organooxygen compounds	811.443	6.44633
M2 di-hydroxylated metabolite	-	M+H-2H2O	C24H28FN3O3	6.4276	pos	Indoles and derivatives	390.194	-8.30841
Neobyakangelicol	-	M+H-H2O	C17H16O6	6.5331	pos	-	299.091	-2.78034
2-Hydroxyiminostilbene	-	M+ACN+Na	C14H11NO	6.5633	pos	Benzazepines	273.101	7.61283
Notoginsenoside T1	-	M+Na	C36H60O10	6.5633	pos	Prenol lipids	675.403	-7.02314
Polypodoside C	-	M+H-2H2O	C40H64O13	6.6615	pos	Steroids and steroid derivatives	717.428	8.86744
4-Ketomyxol	-	M+H	C40H54O4	6.669	pos	-	599.408	-1.70377
4-Oxo-13-cis-retinoate	-	M+H-2H2O	C20H26O3	6.6766	pos	Prenol lipids	279.174	-1.94513
Sphingosine	Sphingolipid metabolism;Metabolic pathways	M+H	C18H37NO2	6.7369	pos	Organonitrogen compounds	300.289	-2.40745
1alpha,25,28-trihydroxyvitamin D2	-	M+H	C28H44O4	6.7746	pos	-	445.33	-3.55412
Tetradecanoylcarnitine	-	M+H	C21H41NO4	6.8571	pos	Fatty Acyls	372.31	-2.56224
Persicachrome	-	M+H-H2O	C25H36O3	6.8873	pos	Prenol lipids	367.261	-6.17302
(2S,4R,5S)-Muscarine	-	2M+NH4	C9H20NO2+	6.9177	pos	Organooxygen compounds	366.336	8.79928
Podolide	-	M+H-H2O	C19H22O5	6.9933	pos	-	313.143	-2.80453
Sphinganine	Sphingolipid metabolism;Metabolic pathways	M+H	C18H39NO2	7.0386	pos	Organonitrogen compounds	302.305	-2.47729
Nagilactone C	-	M+H-2H2O	C19H22O7	7.0915	pos	-	327.122	-2.60412
Dehydroepiandrosterone	Metabolic pathways	M+H-2H2O	C19H28O2	7.0991	pos	Steroids and steroid derivatives	253.195	-1.80813
1alpha-hydroxy-22-(3-methylphenyl)-23,24,25,26,27-pentanorvitamin D3	-	M+H	C29H40O2	7.1067	pos	-	421.308	-5.52918
Eicosanoyl-EA	-	M+H	C22H45NO2	7.1142	pos	-	356.351	-2.68535
(+)-Tephrorin B	-	M+H	C30H28O6	7.1217	pos	-	485.195	-2.71281
Alantolactone	-	M+H	C15H20O2	7.1368	pos	Prenol lipids	233.153	-2.29947
7a,12a-Dihydroxy-3-oxo-4-cholenoic acid	-	M+H	C24H36O5	7.167	pos	Steroids and steroid derivatives	405.263	-2.4569
Pisumoside A	-	M+H+Na	C38H62O21	7.1745	pos	Thiocarboxylic acids and derivatives	439.189	4.72306
Lipoyllysine	-	2M+H	C14H26N2O3S2	7.2046	pos	Dithiolanes	669.29	8.57851
Morusin	-	M+Na	C25H24O6	7.2272	pos	Flavonoids	443.145	-2.76201
Xanthomicrol	-	M+H-2H2O	C18H16O7	7.2348	pos	Flavonoids	309.075	-2.58705
(E,E)-11,13-Octadecadien-9-ynoic acid	-	M+H-2H2O	C18H28O2	7.2649	pos	Fatty Acyls	241.194	-2.49256
Phosphocholine	Metabolic pathways;Glycerophospholipid metabolism	M+H	C5H14NO4P	7.2873	pos	-	184.073	-2.2726
Pyroglutamylvaline	-	M+H-H2O	C10H16N2O4	7.3249	pos	Carboxylic acids and derivatives	211.109	4.90975
Panaxynol	-	M+Na	C17H24O	7.3249	pos	Fatty Acyls	267.171	-2.60232
24(S),25-epoxycholesterol	-	M+Na	C27H44O2	7.3851	pos	-	423.325	2.87
4-Isopropyl-3-cyclohexene-1-carboxylic acid	-	M+NH4	C10H16O2	7.4226	pos	Prenol lipids	186.148	-2.55078
Tarasaponin IV	-	M+2H	C53H84O23	7.4301	pos	Prenol lipids	545.281	6.91094
Molephantin	-	M+H-H2O	C19H22O6	7.4451	pos	-	329.137	-2.76253
Phytolaccoside D	-	M+H-2H2O	C42H66O15	7.5732	pos	Prenol lipids	775.422	-5.23089
Delta-12-Prostaglandin J2	Arachidonic acid metabolism;Metabolic pathways	M+Na	C20H30O4	7.641	pos	Fatty Acyls	357.203	-3.37582
2-Acetyl-3,5,5,6,8,8-hexamethyl-5,6,7,8- tetrahydronaphthalene	-	M+NH4	C18H26O	7.724	pos	Tetralins	276.232	-2.60187
PE(16:0/20:2(11Z,14Z))	-	M+Na	C41H78NO8P	7.724	pos	Glycerophospholipids	766.529	-8.9856
5,8-Epoxy-5,8-dihydro-3-hydroxy-8'-apo-b,y-carotenal	-	M+H	C30H40O3	7.7315	pos	Prenol lipids	449.303	-3.63782
N-Benzyl-2,3-dichloro-6-nitroaniline	-	M+Na	C19H30O4	7.7466	pos	-	345.203	-2.94941
Pectenotoxin 1	-	M+H-H2O	C47H70O15	7.7466	pos	Macrolides and analogues	857.464	-4.66397
Sclareol	Diterpenoid biosynthesis;Biosynthesis of secondary metabolites	M+2Na-H	C20H36O2	7.8673	pos	Prenol lipids	353.245	6.32449
Luteolin	Metabolic pathways;Flavonoid biosynthesis;Biosynthesis of secondary metabolites;Flavone and flavonol biosynthesis	M+H	C15H10O6	7.935	pos	Flavonoids	287.054	-2.72779
Quillaic acid 3-[xylosyl-(1->3)-[galactosyl-(1->2)]-glucuronide]	-	M+2H	C47H72O20	7.9653	pos	Prenol lipids	479.239	2.57422
22-Acetylpriverogenin B	-	M+H	C32H52O5	8.003	pos	Prenol lipids	517.386	-6.0384
Nummularine B	-	M+2Na-H	C32H41N5O6	8.003	pos	Carboxylic acids and derivatives	636.28	5.6193
15-keto Latanoprost	-	M+H	C26H38O5	8.0181	pos	-	431.278	-2.29318
12-oxo-9E-octadecenoic acid	-	M+H	C18H32O3	8.0483	pos	-	297.242	-2.63096
4-Ketonostoxanthin	-	M+H	C40H54O5	8.0558	pos	-	615.404	-1.40356
Doxaprost	-	M+H-H2O	C21H36O4	8.0785	pos	-	335.257	-2.80168
Lucidone C	-	M+H	C24H36O5	8.0785	pos	Steroids and steroid derivatives	405.262	-3.14999
Fenestrel	-	M+H-2H2O	C16H20O2	8.0936	pos	-	209.132	-1.76509
2,6-Dimethylnaphthalene	-	M+H	C12H12	8.2217	pos	Naphthalenes	157.101	-2.06003
Gingerglycolipid C	-	M+Na	C33H60O14	8.2666	pos	Glycerolipids	703.385	-3.04997
7-Ethyl-5,6-dihydro-1,4-dimethylazulene	-	M+H	C14H18	8.3343	pos	Unsaturated hydrocarbons	187.148	-2.14159
Pentadecanol	-	M+K	C15H32O	8.3343	pos	Fatty Acyls	267.21	6.55858
PS(14:1(9Z)/18:3(9Z,12Z,15Z))	-	M+ACN+Na	C38H66NO10P	8.3494	pos	Glycerophospholipids	791.453	-6.98524
17beta-Hydroxy-2alpha-(hydroxymethyl)-17-methyl-5alpha-androstan-3-one	-	M+H	C21H34O3	8.3645	pos	-	335.257	-2.92297
Soyasapogenol C	-	M+H	C30H48O2	8.4545	pos	Prenol lipids	441.372	-2.66682
Avobenzone	-	M+H	C20H22O3	8.5147	pos	-	311.163	-2.92609
Oleyloxyethyl Phosphorylcholine	-	M+H	C25H52NO5P	8.5222	pos	-	478.364	-2.73082
Methyl 10-gingerol	-	M+H	C22H36O4	8.5447	pos	-	365.268	-2.57264
Lanceotoxin B	-	M+Na	C32H44O11	8.5896	pos	-	627.28	3.23058
Furcogenin 3-[2''-glucosyl-6''-arabinosylglucoside]	-	M+H	C44H70O18	8.612	pos	Steroids and steroid derivatives	887.458	-6.11221
PC(O-13:0/O-1:0)[U]	-	M+H	C22H48NO6P	8.6194	pos	-	454.33	2.24813
1-heptadecanoyl-sn-glycero-3-phosphocholine	-	M+H	C25H52NO7P	8.6194	pos	-	510.354	-2.53685
Capsi-amide	-	M+H	C17H35NO	8.7984	pos	-	270.278	-3.66681
Adlupone	-	M+H	C31H46O4	8.8209	pos	Organooxygen compounds	483.343	-7.14866
11-nitro-1-undecene	-	2M+Na	C11H21NO2	8.8436	pos	Allyl-type 1,3-dipolar organic compounds	421.307	9.36863
Momordicoside B	-	M+H	C47H80O19	8.8736	pos	Steroids and steroid derivatives	949.531	-5.61122
MGDG(18:3(9Z,12Z,15Z)/18:4(6Z,9Z,12Z,15Z))	-	M+H	C45H72O10	8.9259	pos	-	773.515	-5.78841
26-Hydroxy-24-epi-brassinolide	-	M+H	C28H48O7	8.9925	pos	-	497.344	-6.51499
Alpha-Terpineol propanoate	-	M+NH4	C13H22O2	9	pos	Prenol lipids	228.195	-3.68407
Oleamide	-	M+ACN+H	C18H35NO	9.0891	pos	Fatty Acyls	323.304	-5.68955
Pectenolone	-	M+H	C40H52O3	9.1187	pos	-	581.401	3.18931
PE(O-16:1(1Z)/22:6(4Z,7Z,10Z,13Z,16Z,19Z))	Metabolic pathways;Glycerophospholipid metabolism;Biosynthesis of secondary metabolites;Glycosylphosphatidylinositol (GPI)-anchor biosynthesis;Autophagy - other	M+K	C43H74NO7P	9.1484	pos	Glycerophospholipids	786.49	8.17158
26-Hexacosanolide	-	M+H	C26H50O2	9.178	pos	-	395.387	-3.70601
11,12-DiHETrE	Arachidonic acid metabolism;Metabolic pathways	2M+Na	C20H34O4	9.1929	pos	Fatty Acyls	699.478	-3.58718
Ethylene brassylate	-	2M+H	C15H26O4	9.23	pos	Macrolides and analogues	541.37	-6.61543
9-Oxoasimicinone	-	M+2Na-H	C37H64O8	9.2523	pos	Fatty Acyls	681.432	1.30631
3-Copaene	-	M+H	C15H24	9.2823	pos	-	205.195	-1.95885
Capsanthin 3,6-epoxide	-	M+H	C40H56O4	9.2898	pos	Prenol lipids	601.424	-2.70175
PE-NMe2(11M3/9D3)	-	M+H	C44H76NO10P	9.3272	pos	Glycerophospholipids	810.523	-5.61236
11-Oxo-beta-amyrin	-	M+H	C30H48O2	9.3496	pos	-	441.372	-2.22781
DG(9D3/9D3/0:0)	-	M+H-H2O	C39H64O7	9.3646	pos	Fatty Acyls	627.46	-2.25899
2-Pentadecylfuran	-	M+NH4	C19H34O	9.4098	pos	Heteroaromatic compounds	296.294	-2.75279
PI(16:0/22:3(10Z,13Z,16Z))	-	M+H	C47H85O13P	9.4098	pos	Glycerophospholipids	889.577	-3.07021
PG(20:5(5Z,8Z,11Z,14Z,17Z)/22:0)	-	M+H	C48H85O10P	9.4174	pos	-	853.592	-3.64389
PS(15:0/22:6(4Z,7Z,10Z,13Z,16Z,19Z))	-	M+H-H2O	C43H72NO10P	9.4864	pos	Glycerophospholipids	776.481	-7.01309
Bullatin	-	M+H-2H2O	C37H66O7	9.509	pos	Fatty Acyls	587.465	-3.57924
12-(2-Cyclopenten-1-yl)-2-dodecanone	-	M+NH4	C17H30O	9.576	pos	-	268.263	-2.59112
PG(17:2(9Z,12Z)/14:1(9Z))	-	M+H	C37H67O10P	9.621	pos	-	703.45	-5.69731
19-Nor-5-androstenediol	-	M+H-H2O	C18H28O2	9.636	pos	Steroids and steroid derivatives	259.205	-2.18846
Heliantriol A1	-	M+NH4	C30H50O3	9.636	pos	Prenol lipids	476.408	-3.02225
Tomentosolic acid	-	M+ACN+H	C30H46O3	9.636	pos	Prenol lipids	496.375	-8.53384
(R)-Carvotanacetone	-	M+NH4	C10H16O	9.6509	pos	Prenol lipids	170.154	-2.54406
Myricanene B 5-[arabinosyl-(1->6)-glucoside]	-	M+2Na-H	C32H42O13	9.6509	pos	Diarylheptanoids	679.227	-9.79759
Dipiperamide C	-	M+K	C33H36N2O6	9.6809	pos	Benzodioxoles	595.222	1.82373
Debenzoylzucchini factor B	-	M+CH3OH+H	C37H53NO3	9.7187	pos	Prenol lipids	592.432	-6.76077
PE(15:0/18:4(6Z,9Z,12Z,15Z))	-	M+K	C38H68NO8P	9.7262	pos	Glycerophospholipids	736.435	5.55728
2-Heptadecylfuran	-	M+NH4	C21H38O	9.7868	pos	Heteroaromatic compounds	324.325	-3.05839
Kanzonol O	-	M+Na	C22H22O6	9.7944	pos	Isoflavonoids	405.128	-6.68424
PA(20:2(11Z,14Z)/22:5(7Z,10Z,13Z,16Z,19Z))	-	M+H-2H2O	C45H75O8P	9.7944	pos	Glycerophospholipids	739.51	4.96683
Americine	-	M+NH4	C31H39N5O4	9.802	pos	Carboxylic acids and derivatives	563.333	-1.45961
PE-NMe2(15:0/20:4(5Z,8Z,11Z,14Z))	-	M+CH3OH+H	C42H76NO8P	9.8096	pos	Glycerophospholipids	786.563	-1.99188
5-Heptyl-3,4-dimethyl-2-furanheptanoic acid	-	2M+ACN+H	C20H34O3	9.8172	pos	Fatty Acyls	686.53	-7.86241
Nb-Hexacosanoyltryptamine	-	M+2Na-H	C36H62N2O	9.8248	pos	Indoles and derivatives	583.453	-7.86468
PC(DiMe(9,3)/DiMe(9,3))	-	M+H-H2O	C44H77NO10P+	9.8324	pos	Glycerophospholipids	793.531	7.33258
Ginsenoside Rh7	-	M+K	C36H60O9	9.84	pos	Prenol lipids	675.383	-6.48428
Ganoderic acid F	-	M+Na	C32H42O9	9.9155	pos	Prenol lipids	593.274	3.33212
PC(18:2(9Z,12Z)/18:4(6Z,9Z,12Z,15Z))	-	M+H	C44H76NO8P	9.9155	pos	Glycerophospholipids	778.536	-3.10572
Isofucosterol 3-O-[6-O-Octadecanoyl-b-D-glucopyranoside]	-	M+2Na-H	C53H92O7	9.9155	pos	Steroids and steroid derivatives	885.657	2.05841
PC(18:3(6Z,9Z,12Z)/18:3(9Z,12Z,15Z))	-	M+Na	C44H76NO8P	9.9305	pos	Glycerophospholipids	800.518	-2.98191
LysoPC(22:0)	Glycerophospholipid metabolism	M+H	C30H62NO7P	9.9456	pos	Glycerophospholipids	580.432	-2.8131
Danazol	-	2M+H	C22H27NO2	9.9456	pos	Steroids and steroid derivatives	675.422	8.85134
PE-NMe2(20:4(5Z,8Z,11Z,14Z)/20:4(5Z,8Z,11Z,14Z))	-	M+CH3OH+H	C47H78NO8P	9.9532	pos	Glycerophospholipids	848.576	-4.86014
Kunzeaol	-	M+NH4	C15H26O	9.9832	pos	-	240.232	-2.9145
Prolyl-Tyrosine	-	2M+K	C14H18N2O4	10.036	pos	Carboxylic acids and derivatives	595.222	9.20198
DG(11M3/9M5/0:0)	-	M+H	C41H68O7	10.0435	pos	Fatty Acyls	673.5	-6.0806
PG(O-20:0/22:6(4Z,7Z,10Z,13Z,16Z,19Z))	-	M+H	C48H85O9P	10.0511	pos	-	837.597	-3.87765
13'-Carboxy-alpha-tocopherol	-	M+H-H2O	C29H48O4	10.0662	pos	Prenol lipids	443.348	-8.04077
Mosinone A	-	M+Na	C37H64O7	10.0662	pos	Fatty Acyls	643.453	-2.42129
17beta-Hydroxy-2alpha-(methoxymethyl)-5alpha-androstan-3-one	-	M+H	C21H34O3	10.0812	pos	-	335.257	-3.29667
DG(16:0/22:6(4Z,7Z,10Z,13Z,16Z,19Z)/0:0)[iso2]	-	M+H	C41H68O5	10.1188	pos	-	641.513	-1.00443
DG(18:2(9Z,12Z)/18:3(9Z,12Z,15Z)/0:0)	-	M+H-H2O	C39H66O5	10.2327	pos	Fatty Acyls	597.486	-2.66437
3-Epipapyriferic acid	-	M+H-2H2O	C35H56O8	10.286	pos	Prenol lipids	569.38	-6.46401
Muricoreacin	-	M+K	C35H64O9	10.286	pos	Fatty Acyls	667.414	-6.91093
Phylloquinone	Metabolic pathways;Ubiquinone and other terpenoid-quinone biosynthesis;Biosynthesis of secondary metabolites	M+H	C31H46O2	10.3087	pos	-	451.356	-3.44834
DG(18:2n6/0:0/20:5n3)	-	M+H-2H2O	C42H68O5	10.3465	pos	Fatty Acyls	617.49	-4.91741
VITAMIN E SUCCINATE(TOCOPHEROL SUCCINATE)	-	M+H	C33H54O5	10.3768	pos	-	531.401	-5.50024
13,14-Dihydro PGF-1a	-	2M+ACN+H	C20H38O5	10.4599	pos	Fatty Acyls	758.582	6.19068
10-Oxo-11-octadecen-13-olide	-	M+H	C18H30O3	10.5969	pos	Macrolides and analogues	295.226	-2.05449
Ganoderiol C	-	M+H-H2O	C32H54O5	10.6502	pos	Prenol lipids	501.39	-7.31013
N-(2R-Hydroxyhexadecanoyl)-2S-amino-9-methyl-4E,8E-octadecadiene-1,3R-diol	-	M+CH3OH+H	C35H67NO4	10.7034	pos	Sphingolipids	598.539	-2.80819
PS(15:0/22:4(7Z,10Z,13Z,16Z))	-	M+NH4	C43H76NO10P	10.7642	pos	Glycerophospholipids	815.562	9.49636
DG(11D5/9D3/0:0)	-	M+H-H2O	C43H72O7	10.8022	pos	Fatty Acyls	683.523	-2.35431
Dimethylethanolamine	Metabolic pathways;Glycerophospholipid metabolism;Biosynthesis of secondary metabolites	M+H	C4H11NO	10.9164	pos	Organonitrogen compounds	90.0916	2.55975
PC(20:5(5Z,8Z,11Z,14Z,17Z)/P-16:0)	-	M+CH3OH+H	C44H78NO7P	10.9392	pos	Glycerophospholipids	796.589	5.15199
DG(i-13:0/a-25:0/0:0)	-	M+K	C41H80O5	10.9697	pos	Glycerolipids	691.561	-4.31756
9R,10S-Epoxy-3Z,6Z-heneicosadiene	-	M+H	C21H38O	10.985	pos	-	307.299	-2.92344
PS(18:0/18:3(9Z,12Z,15Z))	-	M+NH4	C42H76NO10P	10.9926	pos	Glycerophospholipids	803.562	9.36126
Leukotriene B4 dimethylamide	-	2M+H	C22H37NO3	11.1831	pos	Fatty Acyls	727.562	-0.570445
DG(11D5/13M5/0:0)	-	M+H-2H2O	C48H82O7	11.3349	pos	Fatty Acyls	735.588	-4.95294
DG(18:1(11Z)/20:2(11Z,14Z)/0:0)	-	M+ACN+H	C41H74O5	12.029	pos	Glycerolipids	688.584	-5.87062
Cyclohexylammonium	-	2M+H	C6H14N+	13.8352	pos	Organonitrogen compounds	201.232	-2.23047
(S)-(+)-Coniine	-	M+H	C8H17N	13.8732	pos	-	128.143	-1.5384
Geranylcitronellol	-	M+NH4	C20H36O	14.1207	pos	Prenol lipids	310.31	-2.89809
5-oxo-4,5-dihydro-2-furylacetic acid	-	M+H-H2O	C6H6O4	14.929	pos	-	125.023	-0.798471
Pandaroside A	-	M+H	C41H64O15	14.0239	pos	-	797.428	-5.3183
PGP(16:1(9Z)/20:4(5Z,8Z,11Z,14Z))	-	M+K	C42H74O13P2	12.8674	pos	Glycerophospholipids	887.424	0.827988
PG(22:6(4Z,7Z,10Z,13Z,16Z,19Z)/22:6(4Z,7Z,10Z,13Z,16Z,19Z))	-	M+H-2H2O	C50H75O10P	12.7531	pos	Glycerophospholipids	831.497	1.39314
Melleolide M	-	M+H	C23H29ClO7	11.7925	pos	Prenol lipids	453.165	-6.30797
Culinariside	-	M+Na	C45H87NO10	11.4875	pos	Sphingolipids	824.62	-2.5791
DG(16:0/18:1(11Z)/0:0)	AGE-RAGE signaling pathway in diabetic complications	M+NH4	C37H70O5	11.4035	pos	Glycerolipids	612.555	-2.52715
Deoxymyxol	-	M+K	C40H56O2	11.2438	pos	-	607.389	-3.22487
DG(11D5/11D3/0:0)	-	M+H-2H2O	C45H76O7	11.1984	pos	Fatty Acyls	693.541	-5.46511
Lactariamide B	-	M+CH3OH+H	C37H71NO4	11.1984	pos	Sphingolipids	626.57	-2.69563
PE-NMe2(18:0/20:4(8Z,11Z,14Z,17Z))	-	2M+3H2O+2H	C45H82NO8P	11.1831	pos	Glycerophospholipids	809.584	-6.74717
N-[(4E,8E)-1,3-dihydroxyoctadeca-4,8-dien-2-yl]hexadecanamide	-	M+CH3OH+H	C34H65NO3	11.0612	pos	Sphingolipids	568.529	-2.22269
DG(14:0/22:1(13Z)/0:0)	-	M+Na	C39H74O5	11.0536	pos	Glycerolipids	645.541	-3.00077
DG(11D3/11D3/0:0)	-	M+H	C43H72O7	11.0155	pos	Fatty Acyls	701.531	-6.39584
PS(22:0/22:4(7Z,10Z,13Z,16Z))	-	M+H-2H2O	C50H90NO10P	10.7794	pos	Glycerophospholipids	860.62	4.0535
(24R)-Ergost-4-ene-3,6-dione	-	M+CH3OH+H	C28H44O2	10.7414	pos	Steroids and steroid derivatives	445.366	-3.89716
DG(18:1n7/0:0/18:2n6)	-	M+NH4	C40H72O5	10.7262	pos	Glycerolipids	650.57	-2.84294
PS(18:0/22:5(7Z,10Z,13Z,16Z,19Z))	Metabolic pathways;Glycerophospholipid metabolism;Biosynthesis of secondary metabolites;Glycine, serine and threonine metabolism	M+Na	C46H80NO10P	10.6045	pos	Glycerophospholipids	860.537	-4.80138
PE(15:0/22:5(4Z,7Z,10Z,13Z,16Z))	-	M+ACN+H	C42H74NO8P	10.6045	pos	Glycerophospholipids	793.553	5.57214
PA(18:1(11Z)/22:0)	-	M+H-H2O	C43H83O8P	10.6045	pos	Glycerophospholipids	741.578	-2.18899
SM(d18:1/18:0)	Sphingolipid metabolism;Metabolic pathways	M+K	C41H84N2O6P+	10.5969	pos	Sphingolipids	770.568	-2.328
1-O-beta-D-Glucopyranosyl-2,3-di-O-palmitoylglycerol	-	M+2Na-H	C41H78O10	10.5741	pos	Glycerolipids	775.531	0.5228
MG(0:0/24:1(15Z)/0:0)	-	M+2Na-H	C27H52O4	10.5588	pos	Glycerolipids	485.359	2.72728
Messagenin	-	M+H	C29H48O3	10.4751	pos	-	445.366	-2.84562
1-O-beta-D-Glucopyranosyl-2,3-di-O-(8-hexadecenoyl)glycerol	-	M+Na	C41H74O10	10.4675	pos	Glycerolipids	749.515	-3.16227
PE(DiMe(11,3)/DiMe(9,3))	-	M+NH4	C43H74NO10P	10.4372	pos	Glycerophospholipids	813.546	8.91617
PE-NMe2(18:1(11Z)/22:6(4Z,7Z,10Z,13Z,16Z,19Z))	-	M+CH3OH+H	C47H80NO8P	10.4221	pos	Glycerophospholipids	850.595	-0.670066
Vitamin K1 2,3-epoxide	Ubiquinone and other terpenoid-quinone biosynthesis;Biosynthesis of secondary metabolites	M+CH3OH+H	C31H46O3	10.4221	pos	Prenol lipids	499.375	-7.65051
3,5-Dihydroxyergosta-7,22-dien-6-one	-	M+H-2H2O	C28H44O3	10.4221	pos	Steroids and steroid derivatives	393.314	-2.94702
PS(18:3(9Z,12Z,15Z)/24:1(15Z))	-	M+H-2H2O	C48H86NO10P	10.407	pos	Glycerophospholipids	832.589	4.01457
PS(15:0/20:4(5Z,8Z,11Z,14Z))	-	M+NH4	C41H72NO10P	10.407	pos	Glycerophospholipids	787.531	9.57529
DG(15:0/22:4(7Z,10Z,13Z,16Z)/0:0)	-	M+NH4	C40H70O5	10.407	pos	Glycerolipids	648.554	-3.07099
3-O-Sulfogalactosylceramide (d18:1/18:0)	Sphingolipid metabolism;Metabolic pathways	M+K	C42H81NO11S	10.3919	pos	Sphingolipids	846.521	5.75109
Pentacosanoic acid	-	M+Na	C25H50O2	10.3844	pos	Fatty Acyls	405.372	3.23835
DG(15:0/14:0/0:0)	-	M+2Na-H	C32H62O5	10.3768	pos	Glycerolipids	571.432	1.58369
CGS-7181	-	M+CH3OH+H	C20H17F3N2O4	10.3693	pos	-	439.149	3.62556
DG(18:4(6Z,9Z,12Z,15Z)/18:4(6Z,9Z,12Z,15Z)/0:0)	-	M+H-2H2O	C39H60O5	10.3617	pos	Fatty Acyls	573.426	-6.28289
CL(18:0/18:0/22:5(4Z,7Z,10Z,13Z,16Z)/22:5(7Z,10Z,13Z,16Z,19Z))	-	M+H+Na	C89H154O17P2	10.3465	pos	Glycerophospholipids	790.534	3.63564
Lithocholyltaurine	-	2M+K	C26H45NO5S	10.3163	pos	Steroids and steroid derivatives	1005.57	4.13471
Tripoxyrollin	-	M+H	C37H64O5	10.3087	pos	Fatty Acyls	589.481	-3.10917
DG(18:3(6Z,9Z,12Z)/18:2(9Z,12Z)/0:0)	-	M+H	C39H66O5	10.286	pos	Fatty Acyls	615.496	-3.43144
PE-NMe(18:4(6Z,9Z,12Z,15Z)/18:2(9Z,12Z))	-	M+ACN+Na	C42H72NO8P	10.2556	pos	Glycerophospholipids	813.509	-8.88993
PI(16:0/16:2(9Z,12Z))	-	M+H-H2O	C41H75O13P	10.2327	pos	Glycerophospholipids	789.494	3.42565
Schleicherastatin 5	-	M+CH3OH+H	C29H48O3	10.2251	pos	Steroids and steroid derivatives	477.393	-2.96526
Hemorphin-4	-	M+ACN+Na	C29H35N5O7	10.2175	pos	Carboxylic acids and derivatives	629.272	3.90906
PS(18:3(9Z,12Z,15Z)/20:4(5Z,8Z,11Z,14Z))	-	M+NH4	C44H72NO10P	10.2023	pos	Glycerophospholipids	823.531	9.83477
PE-NMe2(11M5/13M5)	-	M+Na	C51H90NO10P	10.187	pos	Glycerophospholipids	930.616	-4.04562
PI(20:1(11Z)/20:4(8Z,11Z,14Z,17Z))	-	M+Na	C49H85O13P	10.1794	pos	Glycerophospholipids	935.568	6.44686
(R)-2-hydroxy-alpha-linolenic acid	-	M+H-2H2O	C18H30O3	10.1491	pos	-	259.205	-2.1651
Methyl 3b,24-dihydroxy-11,13(18)-oleanadien-30-oate	-	M+H	C31H48O4	10.134	pos	Prenol lipids	485.359	-7.17299
FAHFA(16:0/9-O-16:0)	-	M+2Na-H	C32H62O4	10.1264	pos	Fatty Acyls	555.437	2.27114
24-Norursa-3,12-diene	-	M+H	C29H46	10.0887	pos	-	395.366	-2.9476
(2Z)-Oxymetholone	-	M+H	C21H32O3	10.0812	pos	-	333.241	-3.30811
1,2-Di-(9Z,12Z,15Z-octadecatrienoyl)-3-O-beta-D-galactosyl-sn-glycerol	-	M+Na	C45H74O10	10.0737	pos	-	797.515	-3.39015
DG(20:4(8Z,11Z,14Z,17Z)/22:4(7Z,10Z,13Z,16Z)/0:0)	-	M+Na	C45H72O5	10.0587	pos	Glycerolipids	715.532	6.45574
PA(P-16:0/19:0)	-	M+H	C38H75O7P	10.0587	pos	-	675.53	-2.7936
Novobiocin	-	M+CH3OH+H	C31H36N2O11	10.0587	pos	Coumarins and derivatives	645.266	1.20312
PG(P-20:0/22:6(4Z,7Z,10Z,13Z,16Z,19Z))	-	M+H	C48H83O9P	10.0511	pos	-	835.582	-3.78736
SM(d18:0/16:1(9Z))	Sphingolipid metabolism;Metabolic pathways	M+K	C39H79N2O6P	9.9907	pos	Sphingolipids	741.525	-8.12378
Palmitoleamide	-	M+H	C16H31NO	9.9832	pos	-	254.247	-2.56061
LysoPC(24:1(15Z))	Glycerophospholipid metabolism	M+H	C32H64NO7P	9.923	pos	Glycerophospholipids	606.448	-1.916
22alpha-Hydroxy-campest-4-en-3-one	Brassinosteroid biosynthesis;Biosynthesis of secondary metabolites	M+H	C28H46O2	9.908	pos	-	415.356	-3.23523
Phytal	-	M+NH4	C20H38O	9.8703	pos	Prenol lipids	312.325	-3.67661
Notoginsenoside M	-	M+CH3OH+H	C48H82O19	9.8628	pos	Prenol lipids	995.588	9.78304
PC(18:4(6Z,9Z,12Z,15Z)/18:3(6Z,9Z,12Z))	-	M+CH3OH+H	C44H74NO8P	9.8628	pos	Glycerophospholipids	808.543	-7.96743
FAHFA(22:6(4Z,7Z,10Z,13Z,16Z,19Z)/13-O-18:2(9Z,?11E))	-	M+H-H2O	C40H62O4	9.8552	pos	Fatty Acyls	589.458	-5.41882
PS(14:1(9Z)/18:1(9Z))	-	M+H-H2O	C38H70NO10P	9.84	pos	Glycerophospholipids	714.475	5.70811
Demeclocycline	-	M+H-2H2O	C21H21ClN2O8	9.8324	pos	Tetracyclines	429.088	6.22908
Tylosin	-	M+ACN+H	C46H77NO17	9.802	pos	Organooxygen compounds	957.553	-0.136064
DG(11M5/9D3/0:0)	-	M+Na	C42H70O7	9.802	pos	Fatty Acyls	709.499	-2.7792
TG(14:0/18:2(9Z,12Z)/18:4(6Z,9Z,12Z,15Z))	-	M+2Na-H	C53H90O6	9.7944	pos	Glycerolipids	867.647	2.73935
PE-NMe2(14:0/22:6(4Z,7Z,10Z,13Z,16Z,19Z))	-	M+CH3OH+H	C43H74NO8P	9.7944	pos	Glycerophospholipids	796.544	-6.22321
(3b,7b,22x)-Cucurbita-5,24-diene-3,7,23-triol 7-glucoside	-	M+H-2H2O	C36H60O8	9.7792	pos	Steroids and steroid derivatives	585.411	-6.27384
PA(22:2(13Z,16Z)/20:5(5Z,8Z,11Z,14Z,17Z))	-	M+H-H2O	C45H75O8P	9.7413	pos	Glycerophospholipids	757.521	5.93348
7'-Carboxy-alpha-chromanol	-	2M+Na	C21H32O4	9.7262	pos	Benzopyrans	719.445	-6.92406
13'-Carboxy-gamma-tocopherol	-	M+H	C28H46O4	9.7187	pos	Prenol lipids	447.343	-7.66911
Stearidonic acid	alpha-Linolenic acid metabolism;Biosynthesis of secondary metabolites	M+H-H2O	C18H28O2	9.7187	pos	Fatty Acyls	259.205	-2.50104
(3S,3'R,4xi)-beta,beta-Carotene-3,3',4-triol	-	M+H	C40H56O3	9.6885	pos	Prenol lipids	585.43	-1.1866
PC(16:0/20:4(5Z,8Z,10E,14Z)(12OH[S]))	-	M+H	C44H80NO9P	9.6584	pos	-	798.562	-3.05438
PE(MonoMe(11,5)/MonoMe(11,3))	-	M+H-H2O	C45H78NO10P	9.6509	pos	Glycerophospholipids	806.531	-3.04781
Asitrocinone	-	M+2Na-H	C35H64O7	9.636	pos	Fatty Acyls	641.437	1.05584
(3beta,11alpha,13beta)-3,11,13-Oleananetriol	-	M+NH4	C30H52O3	9.636	pos	Prenol lipids	478.424	-2.55946
Oleanolic aldehyde	-	M+H	C30H48O2	9.636	pos	Prenol lipids	441.371	-3.1233
Ergocalciferol	Metabolic pathways;Steroid biosynthesis	M+H-H2O	C28H44O	9.636	pos	Steroids and steroid derivatives	379.335	-2.72012
Estradiol	Metabolic pathways	2M+H	C18H24O2	9.6285	pos	Steroids and steroid derivatives	545.36	-4.37211
PE-NMe(18:1(11Z)/18:4(6Z,9Z,12Z,15Z))	-	M+ACN+Na	C42H74NO8P	9.6059	pos	Glycerophospholipids	815.525	-7.68914
Monoglucuronylglycyrrhetinic acid	-	M+CH3OH+H	C36H54O10	9.5611	pos	Prenol lipids	679.4	-8.45517
Carvotanacetone	-	M+NH4	C10H16O	9.576	pos	Prenol lipids	170.154	-2.57914
11-Aminoundecanoic acid	-	M+H-H2O	C11H23NO2	9.576	pos	-	184.169	-1.96597
28-Glucopyranosyl-3-methyloleanolic acid	-	M+H-2H2O	C37H60O8	9.5611	pos	Prenol lipids	597.411	-6.49626
2-Hexaprenyl-3-methyl-6-methoxy-1,4 benzoquinone	Ubiquinone and other terpenoid-quinone biosynthesis;Biosynthesis of secondary metabolites	M+K	C38H56O3	9.5537	pos	Prenol lipids	599.39	6.66608
1-(4-methoxyphenyl)-4-methylpentan-3-ol	-	2M+H	C13H20O2	9.5314	pos	Phenol ethers	417.296	-8.58061
Heteroxanthin	Metabolic pathways;Biosynthesis of secondary metabolites;Caffeine metabolism	M+Na	C40H56O4	9.524	pos	Prenol lipids	623.412	7.65147
Tetranor 12-HETE	-	2M+H	C16H26O3	9.524	pos	Fatty Acyls	533.38	-7.17002
12S-HHT	-	2M+Na	C17H28O3	9.509	pos	Fatty Acyls	583.4	5.32048
2-Hydroxy-6-(8-tridecenyl)benzoic acid	-	2M+K	C20H30O3	9.5015	pos	Benzene and substituted derivatives	675.406	6.73493
LysoPC(20:0)	Glycerophospholipid metabolism	M+H	C28H58NO7P	9.494	pos	-	552.401	-3.02205
5-Butyl-3-methyl-2-furannonanoic acid	-	2M+Na	C18H30O3	9.4637	pos	Fatty Acyls	611.429	0.876834
PE(18:0/18:3(9Z,12Z,15Z))	-	M+H-2H2O	C41H76NO8P	9.4562	pos	Glycerophospholipids	706.524	9.34739
Bullatetrocin	-	M+2Na-H	C37H66O8	9.4562	pos	Fatty Acyls	683.449	2.97366
(2R)-1-(5-Hydroxy-3-methylpentyl)-2,5,5,8a-tetramethyldecahydro-2-naphthalenol	-	M+NH4	C20H38O2	9.4562	pos	-	328.32	-2.85667
PE(18:3(9Z,12Z,15Z)/P-18:1(11Z))	-	M+H-2H2O	C41H74NO7P	9.4487	pos	Glycerophospholipids	688.512	8.19681
Tsugaric acid B	-	M+H	C33H52O5	9.4487	pos	Prenol lipids	529.387	-2.84876
12,15-Epoxy-13,14-dimethyleicosa-12,14,16-trienoic acid	-	M+H	C22H36O3	9.4336	pos	Fatty Acyls	349.273	-2.83386
DG(15:0/20:5(5Z,8Z,11Z,14Z,17Z)/0:0)	-	M+K	C38H64O5	9.3496	pos	Glycerolipids	639.442	6.15907
14-hydroxyclarithromycin	-	M+ACN+Na	C38H69NO14	9.2898	pos	Organooxygen compounds	827.49	2.55827
Asitrilobin D	-	M+2Na-H	C37H68O7	9.2748	pos	Fatty Acyls	669.468	0.94577
CHOLESTAN-3beta,5alpha,6beta-TRIOL	-	M+H	C27H48O3	9.2598	pos	-	421.366	-3.70047
Alpha-Camphorene	-	M+H	C20H32	9.2003	pos	Prenol lipids	273.257	-2.54117
DG(18:4(6Z,9Z,12Z,15Z)/18:3(6Z,9Z,12Z)/0:0)	-	M+H	C39H62O5	9.1261	pos	Fatty Acyls	611.465	-3.39968
Beta-Phellandrene	-	M+H	C10H16	9.0742	pos	Prenol lipids	137.132	-2.67978
(E)-4,8-Dimethyl-1,3,7-nonatriene	-	M+H	C11H18	9.0742	pos	Prenol lipids	151.148	-2.0295
5-Deoxymyricanone	-	M+ACN+H	C21H24O4	9.0298	pos	Diarylheptanoids	382.202	2.67021
Glabrin D	-	M+H-H2O	C36H49N7O10	9.0149	pos	Carboxylic acids and derivatives	722.353	2.32335
Tuberoside	-	M+Na	C34H56O8	9	pos	Steroids and steroid derivatives	615.385	-2.79834
Lucidenic acid E2	-	M+Na	C29H40O8	9	pos	Prenol lipids	539.264	4.92295
1alpha-hydroxy-24,25,26,27-tetranorvitamin D3 23-carboxylic acid	-	M+H	C23H34O4	9	pos	-	375.252	-2.60302
1-(8Z,11Z,14Z-eicosatrienoyl)-glycero-3-phosphate	-	M+NH4	C23H41O7P	8.9333	pos	Glycerophospholipids	478.291	-3.71048
Physagulin B	-	M+NH4	C30H39ClO7	8.9259	pos	Steroids and steroid derivatives	564.27	-3.26955
PS(14:1(9Z)/22:0)	-	M+Na	C42H80NO10P	8.9109	pos	Glycerophospholipids	812.541	-0.680981
Arachidonic acid	Arachidonic acid metabolism;Linoleic acid metabolism;Metabolic pathways;Biosynthesis of unsaturated fatty acids	M+H-H2O	C20H32O2	8.9109	pos	Fatty Acyls	287.236	-2.33607
Propylene glycol mono- and diesters of fats and fatty acids	-	M+NH4	C32H62O4	8.8661	pos	Fatty Acyls	528.498	-1.99446
Bipindogulomethyloside	-	M+K	C29H44O10	8.836	pos	Steroids and steroid derivatives	591.259	3.79561
DG(10:0/16:0/0:0)	-	M+Na	C29H56O5	8.836	pos	Glycerolipids	507.403	2.24384
16-Acetylpriverogenin A	-	M+H-H2O	C32H50O5	8.8209	pos	Prenol lipids	497.359	-6.72588
PS(15:0/20:2(11Z,14Z))	-	M+CH3OH+H	C41H76NO10P	8.8134	pos	Glycerophospholipids	806.55	-5.09813
(17alpha,23S)-17,23-Epoxy-29-hydroxy-27-norlanosta-1,8-diene-3,15,24-trione	-	M+H	C29H40O5	8.7984	pos	Prenol lipids	469.294	-1.71857
Hebevinoside IV	-	M+H-2H2O	C36H60O7	8.776	pos	Steroids and steroid derivatives	569.419	-2.14605
Docosatrienoic acid	-	M+NH4	C22H38O2	8.7686	pos	Fatty Acyls	352.32	-2.36229
Tetrahydro-11-deoxy cortisol	-	M+NH4	C21H34O4	8.7611	pos	-	368.278	-3.61527
PE(22:6(4Z,7Z,10Z,13Z,16Z,19Z)/P-18:0)	-	M+K	C45H78NO7P	8.7164	pos	Glycerophospholipids	814.521	7.94386
PC(19:1(9Z)/0:0)	-	M+H	C27H54NO7P	8.7015	pos	-	536.37	-2.52882
3-Epinobilin	-	M+NH4	C20H26O5	8.6941	pos	Prenol lipids	364.215	9.19712
9-Hydroxydecanoic acid	-	M+H-H2O	C10H20O3	8.6792	pos	Hydroxy acids and derivatives	171.138	-1.79335
BW 245C	-	M+H	C19H32N2O5	8.6493	pos	-	369.241	7.5117
Leukotriene D4	Arachidonic acid metabolism;Metabolic pathways	M+CH3OH+H	C25H40N2O6S	8.6418	pos	Fatty Acyls	529.297	4.8991
Janthitrem C	-	M+H	C37H47NO4	8.6194	pos	Naphthopyrans	570.354	-6.8548
YD4200000	-	M+ACN+H	C13H28O	8.6194	pos	-	242.247	-3.62623
HU-210	-	M+H	C25H38O3	8.5896	pos	-	387.286	-8.45265
(3alphaOH,20S,24S)-3,19:20,24-Diepoxydammarane-3,25-diol	-	M+Na	C30H50O4	8.5821	pos	Prenol lipids	497.359	-2.9057
PS(18:0/20:3(8Z,11Z,14Z))	-	M+H	C44H80NO10P	8.5747	pos	Glycerophospholipids	814.557	-3.35238
Scillipheosidin 3-[glucosyl-(1->2)-rhamnoside]	-	M+Na	C36H52O14	8.5672	pos	Steroids and steroid derivatives	731.326	2.11165
16beta-Hydroxystellatogenin	-	M+CH3OH+H	C30H48O5	8.5672	pos	Flavonoids	521.381	-6.27636
Methyl farnesoate	-	M+H-2H2O	C16H26O2	8.5672	pos	-	215.179	-2.01294
Ganoderol A	-	M+H	C30H46O2	8.5597	pos	Prenol lipids	439.356	-2.12404
PC(20:2(11Z,14Z)/0:0)	-	M+H	C28H54NO7P	8.5372	pos	-	548.37	-2.25175
LysoPE(0:0/20:4(5Z,8Z,11Z,14Z))	-	M+H	C25H44NO7P	8.5147	pos	Glycerophospholipids	502.289	-7.23774
24-Norursa-3,12-dien-11-one	-	M+H	C29H44O	8.5072	pos	-	409.345	-2.90547
3alpha,12alpha-Dihydroxy-5beta-chol-6-en-24-oic acid	-	M+CH3OH+H	C24H38O4	8.4997	pos	-	423.31	-2.23787
Pimecrolimus	-	M+NH4	C43H68ClNO11	8.4922	pos	Macrolide lactams	827.489	8.83704
Narasin	-	M+Na	C43H72O11	8.4922	pos	Prenol lipids	787.497	-0.14727
Zoapatanol	-	M+H-H2O	C20H34O4	8.4771	pos	-	321.241	-2.95903
1,25-Dihydroxy-24-oxo-16-ene-vitamin D3	-	M+H	C27H40O4	8.462	pos	-	429.299	-1.68621
Cyclopassifloic acid D	-	M+Na	C30H48O6	8.447	pos	Steroids and steroid derivatives	527.336	3.22161
DG(14:0/18:3(6Z,9Z,12Z)/0:0)	-	M+2Na-H	C35H62O5	8.4395	pos	Fatty Acyls	607.434	6.07557
Yucalexin B20	-	2M+ACN+Na	C20H30O3	8.432	pos	Prenol lipids	700.45	-7.12278
(6beta,22E)-6-Hydroxystigmasta-4,22-dien-3-one	-	M+H	C29H46O2	8.4245	pos	Steroids and steroid derivatives	427.356	-2.78657
Calcitroic acid	-	2M+ACN+Na	C23H34O4	8.402	pos	Steroids and steroid derivatives	812.506	-2.24973
Tragopogonsaponin M	-	M+2H	C51H76O16	8.387	pos	Flavonoids	473.265	3.03484
13Z,16Z-docosadienoic acid	Biosynthesis of unsaturated fatty acids	M+H-H2O	C22H40O2	8.387	pos	Fatty Acyls	319.299	-2.58432
Naphthalene-1,2-diol	Metabolic pathways	M+H	C10H8O2	8.387	pos	Naphthalenes	161.059	-2.36566
3-hydroxyhexadecanoyl carnitine	-	M+H-H2O	C23H45NO5	8.3645	pos	Fatty Acyls	398.325	-2.55799
8,8-Dimethoxy-2,6-dimethyl-2-octanol	-	2M+ACN+Na	C12H26O3	8.3569	pos	Organooxygen compounds	500.393	2.26628
Ganoderic acid X	-	M+H	C32H48O5	8.3494	pos	Prenol lipids	513.354	-6.49666
13-apo-beta-carotenone	-	M+H-H2O	C18H26O	8.3343	pos	-	241.194	-2.49482
3-O-Sulfogalactosylceramide (d18:1/12:0)	Sphingolipid metabolism;Metabolic pathways	M+H	C36H69NO11S	8.3268	pos	Sphingolipids	724.473	9.63389
PE(17:1(9Z)/0:0)	-	M+H	C22H44NO7P	8.3268	pos	-	466.292	-2.5676
DG(8:0/17:0/0:0)	-	M+2Na-H	C28H54O5	8.3041	pos	Glycerolipids	515.372	7.1698
LPC(18:2)	-	M+Na	C26H50NO7P	8.2891	pos	-	542.32	-3.4205
Longicamphenylone	-	M+H	C14H22O	8.2592	pos	-	207.174	-2.49003
11-alpha-O-beta-D-Glucopyranosyl-16alpha-O-methylneoquassin	-	M+2Na-H	C29H44O11	8.2517	pos	Prenol lipids	613.264	8.17245
11alpha-Hemiglutaryloxy-1,25-dihydroxyvitamin D3	-	M+H	C33H52O6	8.2517	pos	-	545.382	-2.44518
3-Methyl-1-phenyl-3-pentanol	-	M+H	C12H18O	8.2517	pos	Benzene and substituted derivatives	179.143	-2.29031
Beta-Cadinene	-	M+H	C15H24	8.2367	pos	Prenol lipids	205.195	-2.31078
2alpha-Hydroxypyracrenic acid	-	M+Na	C39H54O7	8.1991	pos	Prenol lipids	657.375	-2.453
Majoroside F1	-	M+2Na	C48H82O19	8.1615	pos	Prenol lipids	504.265	6.13738
2-O-alpha-D-Galactopyranosyl-1-deoxynojirimycin	-	2M+K	C12H23NO9	8.154	pos	Organooxygen compounds	689.244	9.42757
Ixabepilone	-	M+CH3OH+H	C27H42N2O5S	8.1313	pos	Macrolides and analogues	539.318	5.38499
Cyclosativene	-	M+H	C15H24	8.1087	pos	-	205.195	-2.3538
O-Methylbenzhydrol	-	M+H-H2O	C14H14O	8.1012	pos	-	181.101	-1.6889
Docetaxel	-	M+H-H2O	C43H53NO14	8.0861	pos	Prenol lipids	790.342	-1.05778
(23S)-1alpha-hydroxy-25,27-didehydrovitamin D3 26,23-lactone	-	M+H	C27H38O4	8.0785	pos	-	427.283	-3.03825
PG(O-20:0/0:0)	-	M+H	C26H55O8P	8.0407	pos	-	527.372	2.07368
Digoxin	-	M+H-H2O	C41H64O14	8.0256	pos	Steroids and steroid derivatives	763.422	-5.87726
2alpha-(Hydroxymethyl)-17-methyl-5alpha-androstane-3beta,17beta-diol	-	M+H	C21H36O3	8.003	pos	-	337.273	-2.90819
(±)-(Z)-2-(5-Tetradecenyl)cyclobutanone	-	M+ACN+H	C18H32O	8.003	pos	Organooxygen compounds	306.278	-3.02651
Yuzu lactone	-	M+NH4	C12H20O2	8.003	pos	Macrolides and analogues	214.18	-2.72709
Oxidized dinoflagellate luciferin	-	M+Na	C33H38N4O7	7.9879	pos	-	625.264	1.96392
Caryophyllene epoxide	-	M+H	C15H24O	7.9879	pos	-	221.189	-2.34148
3-Pentadecenal	-	M+K	C15H28O	7.9804	pos	Fatty Acyls	263.179	7.16306
3,?4-?Dimethyl-?5-?propyl-2-?furantridecanoic acid	-	M+CH3OH+H	C22H38O3	7.9728	pos	Fatty Acyls	383.312	-8.8791
3-[[5-Methyl-2-(1-methylethyl)cyclohexyl]oxy]-1,2-propanediol	-	2M+Na	C13H26O3	7.9501	pos	Prenol lipids	483.364	-2.55878
Beta-Farnesene	Sesquiterpenoid and triterpenoid biosynthesis	M+H	C15H24	7.9426	pos	Prenol lipids	205.195	-2.25459
12alpha-Hydroxy-3-oxochola-4,6-dien-24-oic Acid	-	M+H	C24H34O4	7.9275	pos	-	387.252	-3.1902
7-OXOCALLITRISIC ACID, METHYL ESTER	-	M+H	C21H28O3	7.9199	pos	-	329.208	-8.8991
Stearidonic Acid methyl ester	-	M+H	C19H30O2	7.9199	pos	-	291.231	-2.84519
6,8,10,12-pentadecatetraenal	-	M+H	C15H22O	7.9048	pos	-	219.174	-2.29258
Hoduloside II	-	M+H-H2O	C48H78O19	7.8898	pos	Prenol lipids	941.506	-4.8022
Isonipecotic acid	-	M+H-H2O	C21H38O4	7.8823	pos	-	337.273	-2.81445
Dehydroabietadienol	-	M+H	C20H30O	7.8748	pos	-	287.236	-3.07562
(-)-Citreoviridin	-	M+H-2H2O	C23H30O6	7.8673	pos	-	367.189	-2.40119
8-hydroxy-alpha-humulene	-	M+ACN+H	C15H24O	7.8673	pos	-	262.216	-1.14776
Cynarasaponin F	-	M+H	C41H64O14	7.8446	pos	Prenol lipids	781.433	-5.05617
PE(19:1(9Z)/0:0)	-	M+H	C24H48NO7P	7.8296	pos	-	494.323	-2.45073
(22E,24E)-1alpha,25-dihydroxy-22,23,24,24a-tetradehydro-24a-homovitamin D3	-	M+H	C28H42O3	7.8296	pos	-	427.32	-2.69685
MG(0:0/18:3(9Z,12Z,15Z)/0:0)	-	M+H	C21H36O4	7.807	pos	Fatty Acyls	353.268	-2.87877
Camellenodiol	-	M+H-H2O	C29H46O3	7.7919	pos	Prenol lipids	425.34	-2.65205
Methylstyrylpyron	-	M+H	C14H12O4	7.7919	pos	-	245.08	-2.58687
Alpha-Linolenic acid	Metabolic pathways;alpha-Linolenic acid metabolism;Biosynthesis of secondary metabolites;Biosynthesis of unsaturated fatty acids	M+NH4	C18H30O2	7.7693	pos	Fatty Acyls	296.258	-2.81891
(+)-longifolene	-	M+H	C15H24	7.7618	pos	-	205.195	-2.23313
2-Cyclotetradecen-1-one	-	M+NH4	C14H24O	7.724	pos	Organooxygen compounds	226.216	-2.67829
Lucidenic acid K	-	M+K	C27H36O7	7.6863	pos	Prenol lipids	511.208	-2.89416
Lactodifucotetraose	-	M+Na	C24H42O19	7.6788	pos	Fatty Acyls	657.218	-5.58752
Carindone	-	M+H	C31H44O6	7.6788	pos	Prenol lipids	513.318	-6.9258
9(R)-HODE	-	M+H-H2O	C18H32O3	7.6637	pos	-	279.231	-2.55028
3-Oxododecanoic acid	-	2M+NH4	C12H22O3	7.6562	pos	Keto acids and derivatives	446.346	-2.77061
Dehydroisocoproporphyrin	-	M+H	C36H36N4O8	7.6334	pos	-	653.259	-2.30433
Smilanippin A	-	M+Na	C39H64O12	7.5807	pos	Steroids and steroid derivatives	747.423	-8.71047
DG(18:0e/2:0/0:0)	Ether lipid metabolism;Metabolic pathways	M+ACN+H	C23H46O4	7.5656	pos	Glycerolipids	428.372	-2.58574
Asparagoside A	-	M+H-2H2O	C33H54O8	7.5505	pos	Fatty Acyls	543.367	-2.24006
PC(17:2(9Z,12Z)/0:0)	-	M+H	C25H48NO7P	7.5355	pos	-	506.323	-2.31175
Medicagenic acid 3-O-[b-D-glucosyl-(1->6)-b-D-glucosyl-(1->3)-b-D-glucoside]	-	M+2H	C48H76O21	7.5355	pos	Prenol lipids	495.25	-3.37764
PC(15:1(9Z)/0:0)	-	M+H	C23H46NO7P	7.5205	pos	-	480.307	-2.66316
(Z)-9-Cycloheptadecen-1-one	-	M+NH4	C17H30O	7.513	pos	Organooxygen compounds	268.263	-2.75286
Tarasaponin I	-	M+H	C47H74O18	7.4979	pos	Prenol lipids	927.49	-5.36114
Hydroxydestruxin B	-	M+2Na	C30H51N5O8	7.4979	pos	Peptidomimetics	327.673	-8.979
26,26,26-trifluoro-25-hydroxy-27-norvitamin D3	-	M+H	C26H39F3O2	7.4903	pos	-	441.299	2.95708
Lysyl-Isoleucine	-	2M+ACN+H	C12H25N3O3	7.4828	pos	Carboxylic acids and derivatives	560.414	2.65359
1alpha,25-dihydroxy-26,27-dimethyl-20,21,22,22,23,23-hexadehydrovitamin D3	-	M+H	C29H42O3	7.4828	pos	-	439.32	-2.47863
Crucigasterin 277	-	M+H	C18H31NO	7.4677	pos	-	278.247	-2.61551
Lipoxin A5	-	M+H-H2O	C20H30O5	7.4376	pos	-	333.203	-9.66686
Euscaphic acid	-	M+H-2H2O	C30H48O5	7.4151	pos	Prenol lipids	453.335	-2.59133
Antibiotic SB 202742	-	M+H-2H2O	C24H34O3	7.4151	pos	Benzene and substituted derivatives	335.236	-1.26131
(3beta)-Cholest-5-ene-3,17,20-triol	-	M+Na	C27H46O3	7.3851	pos	-	441.335	3.11624
20-HETE ethanolamide	-	M+ACN+H	C22H37NO3	7.3851	pos	Organonitrogen compounds	405.314	7.93673
17alpha,21-Dihydroxypregnenolone	-	M+NH4	C21H32O4	7.3851	pos	Steroids and steroid derivatives	366.263	-3.76707
8-{(1s,5r)-4-Oxo-5-[(2z)-2-penten-1-yl]-2-cyclopenten-1-yl}octanoic acid	-	M+H-2H2O	C18H28O3	7.3851	pos	-	257.189	-2.51791
Muricatetrocin C	-	M+2Na-H	C35H64O7	7.3776	pos	Fatty Acyls	641.439	5.21963
Eicosapentaenoyl Ethanolamide	-	M+ACN+H	C22H35NO2	7.3324	pos	Organonitrogen compounds	387.303	7.81217
Heptyl cinnamate	-	M+H-2H2O	C16H22O2	7.3324	pos	Cinnamic acids and derivatives	211.148	-1.79984
(E)-Piperolein A	-	2M+H	C19H25NO3	7.3174	pos	Benzodioxoles	631.379	8.34461
Lucidenic acid J	-	2M+3H2O+2H	C27H38O8	7.2798	pos	Prenol lipids	504.265	-7.56177
11-(2,3-Dihydroxycyclopentyl)undecanoic acid	-	M+H-H2O	C16H30O4	7.2724	pos	-	269.21	-2.42462
Aleprestic acid	-	M+H	C10H16O2	7.2724	pos	-	169.122	-2.3696
Hydrocortisone cypionate	-	M+H	C29H42O6	7.2649	pos	-	487.304	-2.72688
Tacrolimus	-	M+ACN+H	C44H69NO12	7.2498	pos	Macrolide lactams	845.521	7.07122
Notoginsenoside T2	-	M+Na	C37H62O10	7.2498	pos	Prenol lipids	689.424	1.01759
Beta-Micropteroxanthin	-	M+Na	C27H40O2	7.2272	pos	Prenol lipids	419.293	3.37683
Oblongolide	-	M+H	C14H20O2	7.2272	pos	-	221.153	-2.23427
Sterebin D	-	M+2Na-H	C18H30O3	7.2122	pos	Prenol lipids	339.19	-3.15705
Physagulin E	-	M+H-2H2O	C36H50O14	7.2046	pos	Steroids and steroid derivatives	671.304	-2.66791
Kikkanol F	-	M+H-2H2O	C15H26O3	7.1971	pos	-	219.174	-2.189
Pectenotoxin 2	-	M+H	C47H70O14	7.167	pos	Macrolides and analogues	859.479	-5.63067
4,5alpha-Dihydro-2-(hydroxymethylene)testosterone	-	M+CH3OH+H	C20H30O3	7.1142	pos	-	351.252	-2.83888
6,7-dihydro-5-oxo-12-epi-LTB4	-	M+H-2H2O	C20H32O4	7.1142	pos	Fatty Acyls	301.213	-8.63376
Phytocassane B	-	2M+K	C20H30O4	7.0915	pos	Prenol lipids	707.396	6.74696
16-Oxohexadecanoic acid	-	M+NH4	C16H30O3	7.0915	pos	-	288.253	-2.68201
26:5(8Z,11Z,14Z,17Z,20Z)	-	M+H	C26H42O2	7.0688	pos	-	387.325	-2.64664
Spisulosine	-	M+H	C18H39NO	7.0688	pos	-	286.31	-2.57774
MFCD00135217	-	M+K	C20H32O5	7.0386	pos	-	391.189	3.06785
4-[5]-ladderane-butanoic acid	-	M+H	C16H22O2	7.0159	pos	-	247.169	-2.38147
PA(18:3(6Z,9Z,12Z)/0:0)	-	M+H	C21H37O7P	7.0084	pos	-	433.234	-1.47495
2,4,5,7alpha-Tetrahydro-1,4,4,7a-tetramethyl-1H-inden-2-ol	-	2M+Na	C13H20O	6.9933	pos	Organooxygen compounds	407.293	3.64394
Isomytiloxanthin	-	M+H	C40H54O4	6.9857	pos	Prenol lipids	599.409	-1.3192
17-amino-5?-androstan-11-ol	-	M+CH3OH+H	C19H33NO	6.9857	pos	-	324.289	-3.27726
N,N-dimethyl-Safingol	-	M+H	C20H43NO2	6.9631	pos	-	330.336	-3.07717
Longicyclene	-	M+H	C15H24	6.9555	pos	-	205.195	-2.5357
(24E)-15alpha-Acetoxy-3alpha-hydroxy-23-oxo-7,9(11),24-lanostatrien-26-oic acid	-	M+H-2H2O	C32H46O6	6.9404	pos	Fatty Acyls	491.319	5.63014
Iloprost	-	M+H	C22H32O4	6.9253	pos	Fatty Acyls	361.236	-2.95528
Agavoside A	-	M+H-2H2O	C33H52O9	6.9177	pos	Steroids and steroid derivatives	557.346	-1.95186
7'-Carboxy-alpha-tocotrienol	-	2M+ACN+H	C21H30O4	6.8722	pos	Benzopyrans	734.461	-2.49255
DIHYDRO-beta-TUBAIC ACID	-	M+H	C13H16O4	6.8495	pos	-	237.112	-2.66332
JR1320000	-	M+H-H2O	C22H34O2	6.8195	pos	-	313.252	-3.18212
Rishitin	-	M+H-2H2O	C14H22O2	6.8195	pos	Organooxygen compounds	187.148	-2.15942
Cnidilide	-	M+H-2H2O	C12H18O2	6.8195	pos	-	159.116	-2.00029
Gluten exorphin A5	-	M+ACN+H	C29H37N5O9	6.8121	pos	Carboxylic acids and derivatives	641.295	3.53899
12-oxo Phytodienoic Acid	-	M+H-2H2O	C18H28O3	6.8121	pos	-	257.189	-2.67968
Norsanguinine	-	M+ACN+H	C15H17NO3	6.7896	pos	-	301.154	-2.52617
Beta-Lapachone	-	M+H	C15H14O3	6.7671	pos	-	243.101	-2.74777
(6R)-2-Acetyl-6-(3-acetyl-2,4,6-trihydroxy-5-methylphenyl)-3-hydroxy-6-methyl-2,4-cyclohexadien-1-one	-	M+H-H2O	C18H18O7	6.752	pos	-	329.101	-3.24814
Desglucocheirotoxol	-	M+H-H2O	C29H44O10	6.7444	pos	Steroids and steroid derivatives	535.286	-6.6653
Spirotaccagenin	-	M+2Na-H	C27H42O5	6.6615	pos	Prenol lipids	491.276	4.53134
3-hydroxytetradecanoyl carnitine	-	M+H	C21H41NO5	6.5633	pos	Fatty Acyls	388.305	-2.49911
4,5-epoxy-17R-HDHA	-	M+H	C25H34O4	6.5557	pos	-	399.252	-1.51048
PA(18:4(6Z,9Z,12Z,15Z)/0:0)	-	M+H	C21H35O7P	6.5482	pos	-	431.218	-2.4304
Loliolide	-	M+H-2H2O	C11H16O3	6.5407	pos	-	161.096	-1.73302
2,2,6,7-Tetramethylbicyclo[4.3.0]nona-1(9),4-dien-8-one	-	2M+Na	C13H18O	6.5181	pos	Organooxygen compounds	403.262	3.08551
Androst-5-ene-3beta,17beta,19-triol	-	M+H	C19H30O3	6.4804	pos	-	307.226	-2.86584
4-Methyl-1-phenyl-2-pentanol	-	M+H	C12H18O	6.4653	pos	Benzene and substituted derivatives	179.143	-2.11356
J077T478V4	-	M+NH4	C20H30O2	6.4276	pos	-	320.258	-2.74913
Pentalenolactone F	-	M+H-2H2O	C15H18O5	6.4276	pos	-	243.101	-2.3253
Persicaxanthin	-	M+H	C25H36O3	6.42	pos	Prenol lipids	385.273	-3.01225
2alpha-Fluoro-19-nor-22-oxa-1alpha,25-dihydroxyvitamin D3	-	M+H	C25H41FO4	6.4049	pos	-	425.304	-5.77552
MG(10:0/0:0/0:0)	-	M+Na	C13H26O4	6.3822	pos	Glycerolipids	269.174	6.9615
1-Acetyl-2-methylcyclopentene	-	M+Na	C14H24	6.3822	pos	Prenol lipids	215.179	9.61914
Ecklonialactone A	-	M+H	C18H26O3	6.3747	pos	-	291.195	-2.84471
Abscisic aldehyde	Metabolic pathways;Carotenoid biosynthesis;Biosynthesis of secondary metabolites	M+H-H2O	C15H20O3	6.3597	pos	-	231.137	-2.45692
Quinquenoside L1	-	M+K	C48H80O18	6.3521	pos	Prenol lipids	983.501	3.8677
Tectochrysin	-	M+CH3OH+H	C16H12O4	6.3371	pos	-	301.106	-3.28715
Monomenthyl succinate	-	2M+H	C14H24O4	6.2847	pos	Prenol lipids	513.337	-9.91259
3-[4-hydroxy-3-(4-hydroxy-3-methylbut-2-en-1-yl)phenyl]prop-2-enoic acid	-	2M+NH4	C14H16O4	6.262	pos	Cinnamic acids and derivatives	514.246	4.90037
15R-PGE2 methyl ester	-	M+H	C21H34O5	6.2469	pos	-	367.245	-6.67067
Nandrolone	-	M+H-H2O	C18H26O2	6.2393	pos	Steroids and steroid derivatives	257.189	-2.42988
3alpha,7beta,12alpha-Trihydroxy-6-oxo-5alpha-cholan-24-oic Acid	-	M+H	C24H38O6	6.2091	pos	-	423.273	-2.6081
Lubiprostone	-	M+CH3OH+H	C20H32F2O5	6.1562	pos	Fatty Acyls	423.252	-8.49725
Hernandulcin	-	M+NH4	C15H24O2	6.1184	pos	Prenol lipids	254.211	-2.67604
Cis-zeatin-O-glucoside	Zeatin biosynthesis	2M+H	C16H23N5O6	6.1032	pos	Fatty Acyls	763.344	9.07259
Pterosin N	-	M+Na	C14H18O3	6.1108	pos	Indanes	257.116	7.14755
(10Z,14E,16E)-10,14,16-Octadecatrien-12-ynoic acid	-	2M+Na	C18H26O2	6.1032	pos	Fatty Acyls	571.373	-4.36128
1-Naphthol	-	M+H	C10H8O	6.0654	pos	Naphthalenes	145.064	-2.17543
ANETHOLE	Phenylpropanoid biosynthesis	M+H	C10H12O	6.0578	pos	Phenol ethers	149.096	-2.18366
3-[4-hydroxy-2-methoxy-3-(3-methylbut-2-en-1-yl)phenyl]prop-2-enoic acid	-	M+Na	C15H18O4	6.0125	pos	Cinnamic acids and derivatives	285.109	-3.76398
Gymnodimine	-	M+H-H2O	C32H45NO4	6.0049	pos	Pyridines and derivatives	490.33	-3.3792
Prosolanapyrone II	-	M+H-2H2O	C18H24O4	6.0049	pos	-	269.153	-2.04647
Strigolactone ABC-rings	Carotenoid biosynthesis;Biosynthesis of secondary metabolites	M+H-2H2O	C14H18O3	5.9898	pos	-	199.111	-1.67045
Compactin diol lactone	-	M+H	C18H26O4	5.9822	pos	-	307.19	-2.66071
Solenopsin	-	M+CH3OH+H	C17H35N	5.9747	pos	-	286.31	-2.98245
Isoalantolactone	-	M+H	C15H20O2	5.9747	pos	Prenol lipids	233.153	-2.25929
Isolimonic acid	-	M+H	C26H34O10	5.9294	pos	Naphthofurans	507.219	-6.56637
C17 Sphinganine	-	M+H	C17H37NO2	5.9294	pos	-	288.289	-2.67633
Cembra-2,7,11-triene-4,6-diol	-	M+H-2H2O	C20H34O2	5.9218	pos	-	271.241	-2.5595
Alpha-(1,2-Dihydroxyethyl)-1,2,3,4-tetrahydro-7-hydroxy-9-methoxy-3,4-dioxocyclopenta[c][1]benzopyran-6-acetaldehyde	-	M+H-H2O	C17H16O8	5.9143	pos	Coumarins and derivatives	331.084	9.03547
(23S,24S)-17,23-Epoxy-24,29-dihydroxy-27-norlanost-8-ene-3,15-dione	-	M+H-2H2O	C29H44O5	5.8841	pos	Prenol lipids	437.304	-1.61085
Janthitrem E	-	M+2Na	C37H49NO6	5.8841	pos	Naphthopyrans	324.669	5.05678
(R)-Boschniakine	-	M+CH3OH+H	C10H11NO	5.8766	pos	Pyridines and derivatives	194.117	-1.16939
Sclerosporin	-	M+H-2H2O	C15H22O2	5.8691	pos	-	199.148	-1.92655
(x)-2-Heptanol glucoside	-	M+Na	C13H26O6	5.8465	pos	Fatty Acyls	301.164	6.20563
Glaucarubinone	-	M+H	C25H34O10	5.8389	pos	-	495.219	-7.46341
Strobilurin A	-	M+H	C16H18O3	5.8389	pos	Benzene and substituted derivatives	259.132	-2.20036
17-Hydroxy-E4-neuroprostane	-	M+H-2H2O	C22H32O5	5.8238	pos	Fatty Acyls	341.21	-2.12547
Crustecdysone	-	M+Na	C27H44O7	5.8086	pos	Steroids and steroid derivatives	503.299	3.15931
10,11-Dihydroxycarbamazepine	-	2M+H	C15H14N2O3	5.7934	pos	Benzazepines	541.212	7.4477
N-Oleoyl GABA	-	M+2Na-H	C22H41NO3	5.7858	pos	Carboxylic acids and derivatives	412.283	9.70433
25-Hydroxytachysterol3	-	M+Na	C27H44O2	5.7783	pos	Steroids and steroid derivatives	423.325	3.48775
Dihydro-alpha-santalic acid	-	M+H	C15H24O2	5.7707	pos	Benzene and substituted derivatives	237.184	-2.29486
Phenol, 2-(3,7-dimethylocta-2,6-dienyl)-	-	M+H	C16H22O	5.7631	pos	-	231.174	-2.08497
5b-Cyprinol sulfate	-	M+Na	C27H48O8S	5.7556	pos	Steroids and steroid derivatives	555.297	1.38427
Melilotussaponin O2	-	M+2Na	C47H72O19	5.7556	pos	Prenol lipids	493.226	7.10079
Cibaric acid	-	M+NH4	C18H28O5	5.748	pos	Fatty Acyls	342.226	-3.11098
Gibberellin A37 glucosyl ester	-	M+H	C26H36O10	5.7179	pos	Prenol lipids	509.235	-6.64749
Genkwanin	-	M+H	C16H12O5	5.6805	pos	-	285.075	-2.93697
D-NMAPPD	-	M+H	C23H38N2O5	5.673	pos	-	423.288	6.38855
4-coumaroyltriacetic acid lactone	-	M+H-H2O	C15H12O5	5.6578	pos	-	255.064	-2.56217
N6-Carbamoyl-L-threonyladenosine	-	2M+3H2O+2H	C15H21N7O7	5.6503	pos	Purine nucleosides	425.164	6.33774
5-CAFFEOYLSHIKIMIC ACID	-	M+H-2H2O	C16H16O8	5.6351	pos	-	301.07	-2.11721
Xestoaminol C	-	M+H	C14H31NO	5.6351	pos	-	230.247	-2.42726
Flurandrenolide	-	M+H	C24H33FO6	5.6276	pos	Steroids and steroid derivatives	437.231	-4.42537
Beta-Citraurin	-	M+NH4	C30H40O2	5.6051	pos	Prenol lipids	450.335	-2.72307
5,6-epoxy,18R-HEPE	-	M+CH3OH+H	C20H28O4	5.6051	pos	Fatty Acyls	365.229	-9.14615
Hovenidulcigenin A	-	M+ACN+Na	C32H48O7	5.5677	pos	Prenol lipids	608.357	2.36523
3-O-Acetylpinobanksin	-	M+H	C17H14O6	5.5526	pos	-	315.085	-2.73101
Elemicin	-	M+H	C12H16O3	5.5526	pos	Phenol ethers	209.117	-1.77077
Ftalofyne	-	M+CH3OH+H	C14H14O4	5.5451	pos	-	279.122	-3.51645
Goshuyic acid	-	M+NH4	C14H24O2	5.5451	pos	Fatty Acyls	242.211	-2.59483
Roquefortine	-	M+H-H2O	C22H23N5O2	5.5376	pos	Indoles and derivatives	372.184	4.31423
Gingerdione	-	M+H	C17H24O4	5.5301	pos	-	293.172	-9.1911
Trans-EKODE-(E)-Ib	-	M+H	C18H30O4	5.5226	pos	-	311.22	-4.9046
2-Hydroxyethyl 12-hydroxyoctadecanoate	-	M+NH4	C20H40O4	5.5151	pos	-	362.326	-2.7798
Lyciumoside VII	-	M+2Na	C44H74O21	5.4925	pos	Prenol lipids	492.228	5.26908
Kikkanol A	-	M+Na	C15H26O3	5.4849	pos	-	277.178	3.43597
28-Hydroxy-7-octacosanone	-	M+2H	C28H56O2	5.4773	pos	Fatty Acyls	213.22	-8.17936
Parthenolide	-	M+H	C15H20O3	5.4698	pos	-	249.148	-2.32556
3-Hydroxy-6,8-dimethoxy-7(11)-eremophilen-12,8-olide	-	M+NH4	C17H26O5	5.4471	pos	Prenol lipids	328.211	-3.18167
22b-Hydroxycholesterol	Metabolic pathways	M+Na	C27H46O2	5.4395	pos	Steroids and steroid derivatives	425.34	3.47183
Xi-7-Hydroxyhexadecanedioic acid	-	M+ACN+H	C16H30O5	5.4319	pos	Fatty Acyls	344.242	-2.89999
Dinor-PGE2	-	M+H	C18H28O5	5.4017	pos	-	325.199	-6.41391
Cajanol	-	M+H	C17H16O6	5.3563	pos	Isoflavonoids	317.101	-2.39847
Dihydrocumambrin A	-	M+ACN+H	C17H24O5	5.3413	pos	Prenol lipids	350.194	-7.81171
2'',3''-Di-O-p-coumaroylafzelin	-	M+H	C39H32O14	5.3112	pos	Flavonoids	725.184	-3.07027
17beta-Hydroxy-2-oxa-5alpha-androstan-3-one	-	M+NH4	C18H28O3	5.2961	pos	-	310.237	-3.03223
Suxibuzone	-	M+H	C24H26N2O6	5.266	pos	Fatty Acyls	439.191	9.93216
Clovane-2beta,9alpha-diol	-	M+H	C15H26O2	5.266	pos	-	239.2	-2.57743
Butyl 3-O-caffeoylquinate	-	M+2Na-H	C20H26O9	5.2508	pos	Organooxygen compounds	455.132	8.31231
4,5-Dihydro-drospirenone-3-sulfate	-	M+2Na-H	C24H34O5S	5.2358	pos	Lactones	479.188	8.72794
Vignatic acid B	-	M+ACN+H	C27H41N3O7	5.2283	pos	Carboxylic acids and derivatives	561.327	-2.98782
9,12-Octadecadiynoic Acid	-	M+H	C18H28O2	5.2132	pos	-	277.215	-2.75321
Antibiotic GR 95647X	-	M+H	C26H36O6	5.2057	pos	Phenols	445.258	-2.00307
Gambiriin A2	-	M+H-H2O	C30H28O12	5.1756	pos	-	563.153	-2.5505
(S)-Argpyrimidine	-	2M+ACN+H	C11H18N4O3	5.1681	pos	Carboxylic acids and derivatives	550.313	6.03311
3-deoxyestradiol	-	M+H	C18H24O	5.153	pos	-	257.189	-2.7881
Desglucocheirotoxin	-	M+CH3OH+H	C29H42O10	5.1228	pos	Steroids and steroid derivatives	583.308	-6.84196
Spinorphin	-	M+ACN+H	C45H64N8O10	5.1077	pos	Carboxylic acids and derivatives	918.506	-2.55755
1-O-[(2e)-3-(2-hydroxyphenyl)-1-oxo-2-propen-1-yl]-beta-D-Glucopyranose	-	M+H-H2O	C15H18O8	5.1002	pos	-	309.096	-2.91541
2-Phenylethyl octanoate	-	M+H-2H2O	C16H24O2	5.0926	pos	Fatty Acyls	213.163	-1.9461
Kandelin A2	-	M+H	C39H32O15	5.0701	pos	-	741.179	-2.94828
Physagulin G	-	M+H-H2O	C36H50O15	5.0477	pos	Steroids and steroid derivatives	705.311	-1.47162
Coriandrone A	-	M+NH4	C16H20O5	5.0329	pos	Benzopyrans	310.164	-2.53773
Spenolimycin	-	M+H	C15H26N2O7	5.0182	pos	-	347.183	4.10349
1-Methoxy-3-(4-hydroxyphenyl)-2E-propenal 4'-glucoside	-	M+H-2H2O	C16H22O7	4.9958	pos	Organooxygen compounds	291.122	-3.18622
PG(14:0/0:0)	-	M+H	C20H41O9P	4.9884	pos	-	457.257	1.67577
8-Deoxy-11,13-dihydroxygrosheimin	-	M+ACN+H	C15H20O5	4.9809	pos	Prenol lipids	322.164	-4.1235
THYMOQUINONE	-	M+H	C10H12O2	4.9734	pos	Organooxygen compounds	165.091	-2.10138
Tartronate semialdehyde	Metabolic pathways;Glyoxylate and dicarboxylate metabolism;Ascorbate and aldarate metabolism	M+H	C3H4O4	4.9734	pos	Organooxygen compounds	105.018	0.408298
Romucosine C	-	M+H	C20H21NO5	4.966	pos	Aporphines	356.148	-3.58165
N-[(3a,5b,7a)-3-hydroxy-24-oxo-7-(sulfooxy)cholan-24-yl]-Glycine	-	M+ACN+Na	C26H43NO8S	4.951	pos	Steroids and steroid derivatives	593.292	9.84503
Hovenidulcioside A2	-	M+ACN+Na	C38H58O12	4.9285	pos	Prenol lipids	770.409	0.473891
25-O-Desacetyl rifabutin	-	M+H-H2O	C41H56N4O11	4.9135	pos	Naphthofurans	763.386	-6.60824
Ingol	-	M+H	C20H30O6	4.9135	pos	-	367.208	-9.00553
Aloeresin A	-	M+Na	C28H28O11	4.8834	pos	-	563.153	2.06861
1-hydroxy-1,7-diphenylheptan-3-one	-	M+ACN+H	C19H22O2	4.8834	pos	Diarylheptanoids	324.195	-3.25648
Benzyl gentiobioside	-	M+H-H2O	C19H28O11	4.8758	pos	Organooxygen compounds	415.163	6.26954
Dihydromelilotoside	-	2M+Na	C15H20O8	4.8608	pos	Organooxygen compounds	679.219	-2.6034
3-Oxo-12,18-ursadien-28-oic acid	-	M+H	C30H44O3	4.8608	pos	Prenol lipids	453.335	-2.5248
5a-Cholesta-7,24-dien-3b-ol	Metabolic pathways;Steroid biosynthesis	M+Na	C27H44O	4.8608	pos	Glycerophospholipids	407.33	3.48276
Laccaic acid D	-	M+H	C16H10O7	4.8608	pos	Anthracenes	315.049	-2.84468
Benzetimide	-	M+H	C23H26N2O2	4.8307	pos	-	363.205	-3.62515
Glucosylgalactosyl hydroxylysine	-	M+H-2H2O	C18H34N2O13	4.8081	pos	Fatty Acyls	451.193	0.87126
2-(4-(((1R,2S)-2-hydroxycyclopentyl)methyl)phenyl)propanoic acid	-	M+H	C15H20O3	4.8081	pos	-	249.148	-2.58057
Icariside B8	-	M+H-H2O	C19H32O8	4.7856	pos	Prenol lipids	371.205	-2.65025
8-Hydroxy-deoxyguanosine	-	M+H-2H2O	C10H13N5O5	4.7856	pos	Purine nucleosides	248.076	-7.15634
Suberenone	-	M+H	C14H12O4	4.7632	pos	Coumarins and derivatives	245.08	-2.64777
Camelledionol	-	M+H-H2O	C29H44O3	4.7182	pos	Prenol lipids	423.325	-2.7118
SIMAZINE	-	M+H	C7H12ClN5	4.7182	pos	-	202.086	1.36966
Dehydrovomifoliol	-	M+H-2H2O	C13H18O3	4.7032	pos	Prenol lipids	187.111	-1.93448
Phenethylacetate	-	M+H-2H2O	C10H12O2	4.7032	pos	-	129.07	-1.13719
3,4,5-trihydroxy-6-[4-(3-oxopentyl)phenoxy]oxane-2-carboxylic acid	-	M+K	C17H22O8	4.6957	pos	Organooxygen compounds	393.094	-2.31921
7-Hydroxy-1,4,5-trimethoxyxanthone 7-O-[b-D-glucosyl-(1->2)-b-D-galactoside]	-	M+K	C28H34O16	4.6883	pos	Benzopyrans	665.148	0.655365
11,13-Dihydrotaraxinic acid glucosyl ester	-	2M+3H2O+2H	C21H30O9	4.6582	pos	Saccharolipids	440.199	-4.60921
Prolyl-Threonine	-	2M+K	C9H16N2O4	4.6507	pos	Carboxylic acids and derivatives	471.181	-9.59707
Rutagravine	-	M+NH4	C19H17NO5	4.6507	pos	Quinolines and derivatives	357.144	-1.02196
Retinol	Metabolic pathways	M+H-H2O	C20H30O	4.6432	pos	-	269.226	-2.63236
6-Hydroxyetodolac	-	M+CH3OH+H	C17H21NO4	4.6206	pos	Indoles and derivatives	336.179	-5.02061
CEAROIN	-	M+H	C14H12O4	4.6206	pos	-	245.08	-2.4089
Bolandione	-	M+2Na-H	C18H24O2	4.583	pos	-	317.149	-0.318975
Humulene diepoxide A	-	M+H	C15H24O2	4.583	pos	Epoxides	237.184	-2.48846
Heliotrine	-	M+H	C16H27NO5	4.5528	pos	-	314.195	-2.94766
N-(3-Indolylacetyl)-L-isoleucine	-	M+H	C16H20N2O3	4.5528	pos	-	289.154	-3.04485
Alpha-Tetrasaccharide	-	M+H-2H2O	C26H45NO20	4.5453	pos	Organooxygen compounds	656.242	3.17627
5,6-dihydroxy-3-methyl-1,5,6-trihydroquinolin-2-one	-	M+H-2H2O	C10H11NO3	4.5227	pos	-	158.06	-1.86159
Valenciachrome	-	M+Na	C27H40O3	4.4922	pos	Prenol lipids	435.288	3.38185
Cadalene	-	M+H	C15H18	4.4922	pos	Prenol lipids	199.148	-2.3003
(+)-Procyanidin B2	-	M+H	C30H26O12	4.4848	pos	-	579.148	-3.19862
7-hydroxygranisetron	-	M+ACN+Na	C18H24N4O2	4.4848	pos	Benzopyrazoles	392.205	-1.03434
3-Methyloxyindole	-	2M+H	C9H9NO	4.4698	pos	-	295.144	-1.65788
3,4-Dihydro-8,9-dihydroxy-1(2H)-anthracenone	-	M+H	C14H12O3	4.4623	pos	-	229.085	-2.31376
3-cis-Hydroxyglipizide	-	M+ACN+Na	C21H27N5O5S	4.4473	pos	Benzene and substituted derivatives	525.189	-0.259302
Gibberellin A14	Diterpenoid biosynthesis;Biosynthesis of secondary metabolites	M+H	C20H28O5	4.4473	pos	-	349.2	-2.86796
7-Hydroxycostol	-	M+H	C15H24O2	4.4473	pos	Prenol lipids	237.184	-2.50287
(4S,6R)-p-Mentha-1,8-diene-6,7-diol 7-glucoside	-	M+H-H2O	C16H26O7	4.4398	pos	Prenol lipids	313.163	-3.24593
2-Hydroxy-imipramine glucuronide	-	M+K	C25H32N2O7	4.4322	pos	Steroids and steroid derivatives	511.18	-9.08926
Mahanimbinine	-	2M+K	C23H27NO2	4.4172	pos	Indoles and derivatives	737.372	0.450575
Peonidin 3-(6''-p-coumarylglucoside)	-	M+H	C31H28O13	4.4172	pos	-	609.159	-2.51187
Lucyin A	-	M+H-2H2O	C30H46O5	4.4172	pos	Prenol lipids	451.319	-2.54733
Methionyl-Serine	-	M+Na	C8H16N2O4S	4.4172	pos	Carboxylic acids and derivatives	259.074	8.89497
Rothindin	-	M+Na	C22H20O10	4.4097	pos	Isoflavonoids	467.096	2.92855
Alectrol	-	M+Na	C19H22O6	4.4097	pos	Lactones	369.134	9.68743
3,4,5-trihydroxy-6-(2-methyl-3-phenylpropoxy)oxane-2-carboxylic acid	-	M+CH3OH+H	C16H22O7	4.4021	pos	Fatty Acyls	359.169	-2.77436
3-(1,2-dihydroxybutyl)-7-hydroxy-1H-isochromen-1-one	-	M+NH4	C13H14O5	4.4021	pos	Isocoumarins and derivatives	268.118	-0.0342967
Peonidin 3-O-glucoside	Anthocyanin biosynthesis	M+H	C22H22O11	4.3946	pos	-	463.122	-2.64664
Methylarbutin	-	M+H-2H2O	C13H18O7	4.3871	pos	-	251.091	-2.16747
Gibberellin A9	Metabolic pathways;Diterpenoid biosynthesis;Biosynthesis of secondary metabolites	M+CH3OH+H	C19H24O4	4.3645	pos	-	349.2	-3.12168
3-hydroxyropivacaine	-	M+Na	C17H26N2O2	4.3268	pos	Carboxylic acids and derivatives	313.19	4.82841
Phenylalanylproline	-	2M+K	C14H18N2O3	4.3193	pos	Carboxylic acids and derivatives	563.229	4.70756
4-(Methylnitrosamino)-1-(3-pyridyl)-1-butanone	-	M+H-2H2O	C10H13N3O2	4.3193	pos	Organooxygen compounds	172.088	4.03464
Aspartyl-Arginine	-	2M+Na	C10H19N5O5	4.2969	pos	Carboxylic acids and derivatives	601.264	-4.89231
Leukotriene E3	-	M+2Na-H	C23H39NO5S	4.2744	pos	Fatty Acyls	486.225	-1.42942
3-(6,7-dimethoxy-2H-1,3-benzodioxol-5-yl)propanal	-	M+NH4	C12H14O5	4.2594	pos	Benzodioxoles	256.12	9.2699
(1R,2S,3S,4R)-p-Menthane-2,3-diol	-	M+ACN+H	C10H20O2	4.252	pos	Prenol lipids	214.18	-3.14713
4-Hydroxy-5-(phenyl)-valeric acid-O-glucuronide	-	M+H-H2O	C17H22O9	4.237	pos	Organooxygen compounds	353.12	-8.52955
1-O-vanilloyl-beta-D-glucose	-	M+H-2H2O	C14H18O9	4.2295	pos	-	295.081	-1.87411
Simmondsin 2'-ferulate	-	M+CH3OH+H	C26H33NO12	4.222	pos	Cinnamic acids and derivatives	584.233	-1.94466
Alpha-Hydrojuglone 4-O-b-D-glucoside	-	M+H	C16H18O8	4.207	pos	Organooxygen compounds	339.107	-2.58236
Pinocembrin	Flavonoid biosynthesis	M+H	C15H12O4	4.1845	pos	-	257.08	-2.96537
Mukaadial	-	M+ACN+H	C15H22O4	4.1544	pos	-	308.185	-3.15708
Agavasaponin E	-	M+2Na	C62H100O31	4.1395	pos	Isoflavonoids	693.301	-0.928695
Glycoperine	-	M+ACN+H	C19H21NO8	4.132	pos	-	433.16	-1.8528
R1128A	-	M+CH3OH+H	C17H14O5	4.1246	pos	-	331.117	-3.02687
(7R*,8R*)-3-Methoxy-3',4,7,9,9'-pentahydroxy-8,4'-oxyneolignan	-	M+H	C19H24O7	4.0946	pos	Not Available	365.159	-2.40621
Glycitin	Isoflavonoid biosynthesis	M+H	C22H22O10	4.0871	pos	Isoflavonoids	447.127	-3.12977
Kuwanon Q	-	M+CH3OH+H	C40H38O9	4.0796	pos	Diarylheptanoids	695.29	6.77509
Kuwanon L	-	M+H	C35H30O11	4.0796	pos	Flavonoids	627.19	6.77973
Butyl 2-aminobenzoate	-	M+ACN+Na	C11H15NO2	4.0796	pos	Benzene and substituted derivatives	257.128	8.8066
7-HYDROXY-8,4'-DIMETHOXYISOFLAVONE	-	M+H	C17H14O5	4.0646	pos	-	299.091	-2.4027
15-oxo-beta-bilirubin	-	M+H	C33H34N4O7	4.0571	pos	-	599.249	-2.25639
N-(1-Deoxy-1-fructosyl)tryptophan	-	M+H-2H2O	C18H24N2O7	4.0571	pos	Indoles and derivatives	345.144	-2.59763
Daidzin	Isoflavonoid biosynthesis	M+H	C21H20O9	4.0347	pos	Isoflavonoids	417.117	-3.0696
16-Hydroxy-4-carboxyretinoic acid	-	M+H	C20H24O5	4.0347	pos	-	345.169	-3.20762
2-Methylguanosine	-	M+NH4	C11H15N5O5	4.0347	pos	Purine nucleosides	315.142	4.32047
Velutin	-	M+CH3OH+H	C17H14O6	4.0272	pos	-	347.112	-3.00395
Hibiscoquinone A	-	M+CH3OH+H	C15H14O4	4.0197	pos	-	291.122	-3.65003
2-O-Benzoyl-D-glucose	-	M+ACN+Na	C13H16O7	3.9824	pos	Organooxygen compounds	348.107	4.66459
3-oxo-3-[(3,4,5,6-tetrahydroxyoxan-2-yl)methoxy]propanoic acid	-	M+H-H2O	C9H14O9	3.9675	pos	Organooxygen compounds	249.06	-2.62196
5-oxo-delta-bilirubin	Biosynthesis of secondary metabolites;Porphyrin and chlorophyll metabolism	M+CH3OH+H	C33H34N4O7	3.9526	pos	-	631.275	-2.76444
2-Methoxynaphthalene	-	M+H	C11H10O	3.9377	pos	Naphthalenes	159.08	-2.28953
5'-Deoxy-5-fluorocytidine	-	M+ACN+Na	C9H12FN3O4	3.9302	pos	5'-deoxyribonucleosides	309.096	-4.01351
2-Methylfuran	-	M+H	C5H6O	3.9227	pos	Heteroaromatic compounds	83.0494	3.35586
Caffeoquinone	-	M+H	C9H6O4	3.9003	pos	-	179.033	-2.34025
Ustiloxin A	-	M+NH4	C28H43N5O12S	3.8928	pos	Carboxylic acids and derivatives	691.294	-3.34424
GINKGOLIDE C	-	M+Na	C20H24O11	3.8928	pos	Prenol lipids	463.12	-2.88901
(4-ethyl-2-methoxyphenyl)oxidanesulfonic acid	-	M+ACN+Na	C9H12O5S	3.8928	pos	Organic sulfuric acids and derivatives	296.058	7.07235
Physalin K	-	M+CH3OH+H	C28H30O12	3.8777	pos	Steroids and steroid derivatives	591.203	-6.97628
Castamollissin	-	M+CH3OH+H	C20H20O13	3.8702	pos	Organooxygen compounds	501.123	-2.79269
3'-Sialyllactosamine	-	M+ACN+H	C23H40N2O18	3.8328	pos	Organooxygen compounds	674.264	3.32907
Aloesol 7-glucoside	-	2M+H	C19H24O9	3.8254	pos	Organooxygen compounds	793.29	-1.10939
Ramentaceone	-	M+CH3OH+H	C11H8O3	3.7954	pos	-	221.08	-3.14545
3-Phenyl-4-pentenal	-	M+H	C11H12O	3.7954	pos	Benzene and substituted derivatives	161.096	-2.25118
Nb-trans-Feruloylserotonin glucoside	-	M+ACN+H	C26H30N2O9	3.7879	pos	Organooxygen compounds	556.227	-3.29789
Methionyl-Hydroxyproline	-	2M+Na	C10H18N2O4S	3.7879	pos	Carboxylic acids and derivatives	547.182	-8.70401
3-Carboxy-4-methyl-5-propyl-2-furanpropionic acid	-	2M+H	C12H16O5	3.7804	pos	Fatty Acyls	481.203	-7.48084
CHRYSAROBIN	-	M+H	C15H12O3	3.7729	pos	-	241.085	-2.78119
Putaminoxin	-	M+H	C12H20O3	3.7729	pos	-	213.148	-2.47019
2,3',4,6-Tetrahydroxybenzophenone	-	M+H	C13H10O5	3.7654	pos	-	247.059	-2.46807
1,7-bis(4-hydroxyphenyl)hept-1-ene-3,5-dione	-	M+NH4	C19H18O4	3.713	pos	Diarylheptanoids	328.153	-2.94375
Phyllanthusol A	-	M+NH4	C35H49NO19	3.7056	pos	Organooxygen compounds	805.327	3.94764
Molephantinin	-	M+CH3OH+H	C20H24O6	3.6906	pos	-	393.189	-4.11574
2-Hydroxyphenylacetic acid methyl ester	-	M+H	C9H10O3	3.6906	pos	-	167.07	-2.3807
Toluene	Metabolic pathways	M+H	C7H8	3.6906	pos	Benzene and substituted derivatives	93.0701	1.9851
3,4,5-Trimethoxycinnamic acid	-	M+H	C12H14O5	3.6832	pos	Cinnamic acids and derivatives	239.091	-2.44889
Trp derivative	-	M+H	C11H13NO4	3.6682	pos	-	224.091	-2.54315
Ligustroside	-	M+Na	C25H32O12	3.6607	pos	Organooxygen compounds	547.183	7.71991
Fustin 3-O-beta-D-galactoside	-	M+H-H2O	C21H22O11	3.6308	pos	-	433.112	-2.6364
Torvoside E	-	M+NH4	C40H66O14	3.6159	pos	Steroids and steroid derivatives	788.476	-4.20061
4-n-Pentylphenol	-	M+H	C11H16O	3.6084	pos	-	165.127	-2.2534
(1R,4S)-1-hydroxylimonen-2-one	-	M+H-H2O	C10H16O2	3.6084	pos	-	151.111	-2.32612
Chavicol	Phenylpropanoid biosynthesis	M+H-H2O	C9H10O	3.6084	pos	Phenols	117.07	-0.494929
Gamma-Glutamylcysteinylserine	-	M+CH3OH+H	C11H19N3O7S	3.601	pos	Carboxylic acids and derivatives	370.127	-1.29636
Marmesin galactoside	-	M+CH3OH+H	C20H24O9	3.5935	pos	Coumarins and derivatives	441.172	-8.07552
Khellin	-	M+H	C14H12O5	3.5861	pos	-	261.075	-2.74852
Indole-3-ethanol	Tryptophan metabolism	M+H	C10H11NO	3.5861	pos	-	162.091	-2.5617
Phosphoric acid	Metabolic pathways;Photosynthesis;ABC transporters;Oxidative phosphorylation	M+H	H3O4P	3.5861	pos	Non-metal oxoanionic compounds	98.9843	1.61552
Quercetin 3-methyl ether	-	M+H	C16H12O7	3.5786	pos	-	317.065	-2.94098
(E,E)-N-4-Methoxystyrylcinnamide	-	M+ACN+H	C18H17NO2	3.5263	pos	Phenol ethers	321.159	-2.7472
Kaempferol 3-(2''-rhamnosylgalactoside) 7-rhamnoside	-	M+H+Na	C33H40O19	3.5188	pos	Flavonoids	382.108	5.50462
N,N'-Bis(3-chloro-9-acridinyl)-1,8-octanediamine	-	M+H-2H2O	C14H18O7	3.5113	pos	-	263.091	-2.44641
Ethyl 3-hydroxydodecanoate	-	M+NH4	C14H28O3	3.5038	pos	Fatty Acyls	262.237	-2.82056
Trans-Lachnophyllol	-	M+H-H2O	C10H12O	3.5038	pos	-	131.085	-1.54089
(S)-11,12,13-Trinor-7-calamenone	-	M+H	C12H14O	3.4963	pos	Tetralins	175.111	-1.91002
N-Benzylformamide	-	M+H	C8H9NO	3.4963	pos	-	136.075	-2.17896
(S)-5-Hydroxymethyl-2[5H]-furanone	-	M+H	C5H6O3	3.4665	pos	-	115.039	-0.279237
(±)-Naringenin	-	M+H	C15H12O5	3.459	pos	-	273.075	-3.00996
7alpha,17beta-Dihydroxyandrosta-1,4-dien-3-one	-	M+ACN+H	C19H26O3	3.4366	pos	-	344.221	-3.07148
Lauric acid	Metabolic pathways;Fatty acid biosynthesis	M+NH4	C12H24O2	3.4366	pos	-	218.211	-2.58751
4'-Methyl-(-)-epigallocatechin 7-glucuronide	-	M+CH3OH+H	C22H24O13	3.4142	pos	Flavonoids	529.154	-2.95321
Gibberellin A34-catabolite	Diterpenoid biosynthesis	M+H-2H2O	C19H22O6	3.4142	pos	-	311.127	-2.75203
Coronafacic acid	-	M+H-2H2O	C12H16O3	3.4142	pos	-	173.096	-1.76686
Clavamycin F	-	M+2Na-H	C15H24N4O7	3.3843	pos	-	417.136	0.51363
Demethyloleuropein	-	M+H	C24H30O13	3.3694	pos	Flavonoids	527.173	-5.1669
Farinosin	-	M+H-2H2O	C15H18O4	3.347	pos	-	227.106	-2.46833
Baicalin	-	M+H	C21H18O11	3.3172	pos	Macrolides and analogues	447.091	-3.13262
Cyanidin 3-(6''-acetylglucoside)	-	M+H	C23H22O12	3.2128	pos	-	491.117	-2.62166
2,6-nonadienoic acid	-	M+H	C9H14O2	3.2128	pos	-	155.106	-2.53499
Tyrosyl-Hydroxyproline	-	M+H-2H2O	C14H18N2O5	3.183	pos	Carboxylic acids and derivatives	259.107	-2.47769
Threoninyl-Tryptophan	-	M+ACN+Na	C15H19N3O4	3.1681	pos	Carboxylic acids and derivatives	369.151	-7.64847
Curcumenone	-	M+H	C15H22O2	3.1532	pos	Prenol lipids	235.169	-2.44645
Actodigin	-	M+H-2H2O	C29H44O9	3.1382	pos	-	501.283	-2.73259
Teadenol A	-	M+H	C14H12O6	3.1307	pos	-	277.07	-2.47234
(-)-trans-Pinocarveol	-	M+H	C10H16O	3.1307	pos	Prenol lipids	153.127	-2.4595
1-Hydroxy-3-octanone	-	M+H	C8H16O2	3.1307	pos	Fatty Acyls	145.122	-2.13297
Nicotinamide riboside	Metabolic pathways;Nicotinate and nicotinamide metabolism	2M+ACN+Na	C11H15N2O5+	3.1233	pos	Organooxygen compounds	574.212	0.494575
10,11-dihydro-leukotriene B4	-	M+Na	C20H34O4	3.1158	pos	Fatty Acyls	361.236	3.96239
Glutinosone	-	M+ACN+H	C14H20O2	3.1084	pos	-	262.18	-2.67348
Quercetin 3-(6''-malonylgalactoside)	-	M+H	C24H22O15	3.0935	pos	-	551.102	-2.36134
Luteolin 3'-(3''-acetylglucuronide)	-	M+CH3OH+H	C23H20O13	3.0711	pos	Flavonoids	537.123	-2.61102
Genistin	Isoflavonoid biosynthesis	M+H	C21H20O10	3.0636	pos	Isoflavonoids	433.111	-3.54132
Aldosine	-	2M+NH4	C12H18N2O4	3.0413	pos	Carboxylic acids and derivatives	526.284	-5.4482
2-Furanmethanol	-	M+H	C5H6O2	3.0264	pos	Heteroaromatic compounds	99.0442	1.3233
Parthenin	-	M+H	C15H18O4	3.004	pos	-	263.127	-2.50864
Aethusin	-	M+H	C13H14	2.9966	pos	-	171.116	-2.30857
2,6-Dimethyl-4-hydroxybenzaldehyde	-	M+H	C9H10O2	2.9966	pos	-	151.075	-2.40192
Lucuminoside	-	M+ACN+H	C19H25NO10	2.9891	pos	Organooxygen compounds	469.181	-1.84219
(-)-Naringenin	Isoflavonoid biosynthesis;Metabolic pathways;Flavonoid biosynthesis;Biosynthesis of secondary metabolites	M+H	C15H12O5	2.9518	pos	-	273.075	-2.8888
Dactylin	-	M+H+Na	C28H32O17	2.9443	pos	Linear 1,3-diarylpropanoids	332.082	6.73038
Hydroxystrobilurin D	-	M+ACN+H	C26H34O7	2.922	pos	Fatty Acyls	500.261	-6.80693
Pulcherosine	-	M+CH3OH+H	C27H29N3O9	2.9145	pos	Fatty Acyls	572.222	-3.26056
Lotaustralin	Cyanoamino acid metabolism;Biosynthesis of secondary metabolites	2M+NH4	C11H19NO6	2.9145	pos	Organooxygen compounds	540.28	6.5755
8,12-Epoxy-4(15),7,11-eudesmatrien-1-one	-	M+NH4	C15H18O2	2.8996	pos	Prenol lipids	248.164	-2.69738
M-Cresol	Metabolic pathways	M+H	C7H8O	2.8996	pos	Phenols	109.065	0.0959852
(±)-threo-1-(p-Hydroxyphenyl)propylene glycol 4'-glucoside	-	M+H-H2O	C15H22O8	2.8624	pos	Organooxygen compounds	313.125	-9.96776
2,6-nonadienal	-	M+H	C9H14O	2.855	pos	-	139.111	-2.24618
Nb-trans-p-Coumaroylserotonin glucoside	-	M+ACN+H	C25H28N2O8	2.8475	pos	Organooxygen compounds	526.217	-2.05663
Cyanin	Anthocyanin biosynthesis	M+H	C27H30O16	2.8251	pos	-	611.159	-2.54491
EUPAROTIN ACETATE	-	M+H-H2O	C22H26O8	2.8101	pos	-	401.158	-2.73583
Benzarone	-	M+ACN+Na	C17H14O3	2.8101	pos	-	330.109	-4.65387
Abscisic acid	Metabolic pathways;Carotenoid biosynthesis;Biosynthesis of secondary metabolites;Plant hormone signal transduction	M+H-2H2O	C15H20O4	2.8027	pos	Prenol lipids	229.122	-2.13969
Methylisoeugenol	Phenylpropanoid biosynthesis	M+H	C11H14O2	2.7878	pos	Benzene and substituted derivatives	179.106	-2.38611
Quercetin 3-beta-D-glucoside	Metabolic pathways;Biosynthesis of secondary metabolites;Flavone and flavonol biosynthesis	M+H	C21H20O12	2.773	pos	-	465.101	-2.79595
3-(a-Naphthoxy)lactic acid	-	M+H	C13H12O4	2.7656	pos	-	233.08	-2.0319
Isookaninglucoside	-	M+H	C21H22O11	2.7581	pos	-	451.122	-2.34958
Methyl vanillate	-	M+H	C9H10O4	2.7581	pos	Benzene and substituted derivatives	183.065	-2.02204
3-Hydroxyanthranilic acid	Metabolic pathways;Tryptophan metabolism	M+H	C7H7NO3	2.7208	pos	Benzene and substituted derivatives	154.049	-2.49995
4-Hydroxy-4-(3-pyridyl)-butanoic acid	-	M+H	C9H11NO3	2.6986	pos	Pyridines and derivatives	182.081	-2.09867
L-Threo-3-Phenylserine	-	M+H-H2O	C9H11NO3	2.6986	pos	Carboxylic acids and derivatives	164.07	-2.33619
2-Methyl-3,4-quinolinediol	-	M+H-H2O	C10H9NO2	2.6986	pos	-	158.06	-2.02878
XANTHYLETIN	-	M+H	C14H12O3	2.6912	pos	-	229.085	-2.05314
Romucosine H	-	M+H	C21H23NO6	2.6837	pos	Organooxygen compounds	386.159	-3.26229
Aspirin	-	M+CH3OH+H	C9H8O4	2.6688	pos	Benzene and substituted derivatives	213.075	-2.72045
2-Ethyl-5-imino-1-cyclopenten-1-ol	-	M+H	C7H11NO	2.6688	pos	Organonitrogen compounds	126.091	-1.3141
Gentianamine	-	M+CH3OH+H	C11H11NO3	2.6614	pos	-	238.107	-2.71099
Ser-Ser-OH	-	M+H	C12H14N2O8	2.6464	pos	-	315.085	9.88846
Isovalerylglutamic acid	-	M+H	C10H17NO5	2.6464	pos	Carboxylic acids and derivatives	232.117	-2.34599
(±)-Aegeline	-	M+H	C18H19NO3	2.624	pos	Cinnamic acids and derivatives	298.143	-2.85472
Valinopine	-	M+H	C10H17NO6	2.609	pos	-	248.112	-2.79475
Indolelactic acid	Tryptophan metabolism	M+H	C11H11NO3	2.6016	pos	Indoles and derivatives	206.081	-1.82288
Eriodictyol	Flavonoid biosynthesis;Biosynthesis of secondary metabolites	M+H	C15H12O6	2.5941	pos	Flavonoids	289.07	-2.99686
Fluorouracil	-	M+NH4	C4H3FN2O2	2.5868	pos	Diazines	148.051	-2.01556
2-Phenylethyl butanoate	-	M+ACN+H	C12H16O2	2.5868	pos	Fatty Acyls	234.148	-2.73215
3,4-Dimethoxyphenyl methyl ketone	-	M+H	C10H12O3	2.5793	pos	-	181.085	-2.45282
3-Methoxy-4-hydroxyphenylglycolaldehyde	Metabolic pathways;Tyrosine metabolism	M+H	C9H10O4	2.5645	pos	Phenols	183.065	-2.26232
Norwedelic acid	-	M+H	C15H10O8	2.557	pos	-	319.044	-2.43337
6-[3-(4-carboxy-2-hydroxybutyl)phenoxy]-3,4,5-trihydroxyoxane-2-carboxylic acid	-	M+H-H2O	C17H22O10	2.5347	pos	Saccharolipids	369.117	-2.07567
1D-myo-inositol 2-acetamido-2-deoxy-alpha-D-glucopyranoside 3-phosphate	-	M+NH4	C14H26NO14P	2.5048	pos	-	481.144	3.22182
Indican	-	M+CH3OH+H	C14H17NO6	2.4973	pos	Organooxygen compounds	328.138	-3.18109
3-propyl acrolein	-	M+H	C6H10O	2.4973	pos	-	99.0806	1.54028
Quercetin 3-rutinoside 7-galactoside	-	M+H+Na	C33H40O21	2.4823	pos	Flavonoids	398.103	5.18705
Bis(4-hydroxyphenyl)methane	-	M+H	C13H12O2	2.4749	pos	-	201.091	-1.92954
4-Hydroxyphenylpyruvate	Metabolic pathways;Biosynthesis of secondary metabolites;2-Oxocarboxylic acid metabolism;Ubiquinone and other terpenoid-quinone biosynthesis;Biosynthesis of amino acids;Isoquinoline alkaloid biosynthesis;Tyrosine metabolism;Monobactam biosynthesis;Phenylalanine, tyrosine and tryptophan biosynthesis	M+H-H2O	C9H8O4	2.4675	pos	-	163.039	-2.21307
5-Decynoic acid	-	M+H	C10H16O2	2.46	pos	-	169.122	-2.15968
4-Hydroxy-3-methoxyphenethyl alcohol	-	M+H	C9H12O3	2.4377	pos	-	169.086	-2.49535
N17-Dimethylindole-3-carboxaldehyde	-	M+H	C11H11NO	2.4377	pos	-	174.091	-1.82397
Arene oxide	-	M+H-H2O	C6H6O	2.4377	pos	-	77.0389	3.41167
Citreorosein	-	M+H	C15H10O6	2.4228	pos	Anthracenes	287.054	-2.66583
3-O-Benzyl-4,5-O-(1-methylethyldiene)-b-D-fructopyranose	-	M+H	C16H22O6	2.4154	pos	-	311.151	6.18703
2,3-dihydroxy-1-(4-hydroxy-3-methoxyphenyl)-propan-1-one	-	M+ACN+H	C10H12O5	2.4079	pos	-	254.102	-1.89234
Alpha-D-Galactosyl-N-acetyllactosamine	-	M+H	C20H35NO16	2.4004	pos	-	546.207	7.11289
(E)-Ferulic acid	Metabolic pathways;Phenylpropanoid biosynthesis;Biosynthesis of secondary metabolites	M+H-H2O	C10H10O4	2.4004	pos	-	177.054	-2.32279
Nomilinic acid 17-glucoside	-	M+H-H2O	C34H48O16	2.3855	pos	Saccharolipids	695.287	-5.35188
Aloesol	-	M+H	C13H14O4	2.378	pos	Benzopyrans	235.096	-3.0975
Malabaricone C	-	M+Na	C21H26O5	2.3705	pos	Organooxygen compounds	381.164	-7.89886
FRAXIDIN METHYL ETHER	-	M+H	C12H12O5	2.363	pos	-	237.075	-2.48974
6-Hydroxymelatonin glucuronide	-	2M+H	C19H24N2O9	2.3481	pos	Organooxygen compounds	849.301	-2.9084
(5R)-6-Hydroxy-5-isopropenyl-2-methylhexanoate	Limonene and pinene degradation	M+ACN+H	C10H18O3	2.3406	pos	-	228.159	-1.19446
Glandulone B	-	M+H	C15H16O3	2.3107	pos	Prenol lipids	245.117	-2.50393
2,3-dihydroxy-2,3-dihydrobenzoic acid	-	M+H-H2O	C7H8O4	2.2883	pos	-	139.039	-2.16761
3-METHOXYCATECHOL	-	M+H	C7H8O3	2.2808	pos	-	141.054	-2.43225
EMODIC ACID	-	M+H	C15H8O7	2.2734	pos	-	301.033	-2.89668
3,4,5-trihydroxy-6-[2-(3-oxoprop-1-en-1-yl)phenoxy]oxane-2-carboxylic acid	-	M+ACN+H	C15H16O8	2.2659	pos	Organooxygen compounds	366.117	-2.95622
AC 45594	-	M+H-2H2O	C13H20O2	2.2659	pos	-	173.132	-1.88804
(1R,2R)-3,5-Cyclohexadiene-1,2-diol	-	M+H-2H2O	C6H8O2	2.2585	pos	-	77.0389	2.84712
(S)-Edulinine	-	M+K	C16H21NO4	2.2511	pos	Quinolines and derivatives	330.109	-4.93712
(S)-(-)-Perillyl alcohol	Biosynthesis of secondary metabolites;Limonene and pinene degradation;Monoterpenoid biosynthesis	M+H-H2O	C10H16O	2.2511	pos	-	135.117	-1.99404
N-Acetyl-9-O-acetylneuraminic acid	-	M+NH4	C13H21NO10	2.2287	pos	Organooxygen compounds	369.151	2.19562
Citrusin D	-	M+NH4	C16H22O8	2.2287	pos	Fatty Acyls	360.164	-2.58365
4-Formyl-3-(formylmethyl)-4-hexenoic acid	-	M+NH4	C9H12O4	2.2287	pos	Fatty Acyls	202.107	-2.54334
2-Phenylaminoadenosine	-	M+ACN+Na	C16H18N6O4	2.2212	pos	Purine nucleosides	422.158	9.01277
Isosalicin	-	M+H-H2O	C13H18O7	2.2063	pos	Organooxygen compounds	269.101	-2.60906
4,5-Bisphenol-o-quinone	-	M+H	C15H14O3	2.2063	pos	-	243.101	-2.89335
Cyanidin	Anthocyanin biosynthesis;Flavonoid biosynthesis;Biosynthesis of secondary metabolites	M+H	C15H10O6	2.1989	pos	-	287.054	-3.07912
Isoniazid pyruvate	-	M+H-H2O	C9H9N3O3	2.1841	pos	Pyridines and derivatives	190.062	3.26811
Riboflavin	Metabolic pathways;Biosynthesis of secondary metabolites;Oxidative phosphorylation;Riboflavin metabolism	M+H-2H2O	C17H20N4O6	2.1543	pos	Pteridines and derivatives	341.122	-6.42032
S-Carboxymethyl-L-cysteine	-	M+H-H2O	C5H9NO4S	2.1543	pos	Carboxylic acids and derivatives	162.022	-1.84384
S-Adenosylhomocysteine	Metabolic pathways;Cysteine and methionine metabolism;Biosynthesis of amino acids	M+NH4	C14H20N6O5S	2.1394	pos	5'-deoxyribonucleosides	402.154	-2.71233
3,4,5-trihydroxy-6-[2-(3-oxopropyl)phenoxy]oxane-2-carboxylic acid	-	M+ACN+H	C15H18O8	2.1394	pos	Organooxygen compounds	368.133	-3.10538
Quercetin 3-O-sophoroside	Flavone and flavonol biosynthesis	M+H	C27H30O17	2.1244	pos	-	627.156	0.433889
{(1R,2R)-2-[(2z)-5-Hydroxy-2-penten-1-yl]-3-oxocyclopentyl}acetic acid	-	M+NH4	C12H18O4	2.117	pos	-	244.154	-2.55523
Caffeyl alcohol	Phenylpropanoid biosynthesis;Biosynthesis of secondary metabolites	M+H	C9H10O3	2.1095	pos	-	167.07	-2.19316
Vaccinoside	-	M+NH4	C25H28O13	2.0946	pos	Prenol lipids	554.186	-1.545
16-iodo-hexadecanoic acid	-	M+H	C16H31IO2	2.0796	pos	-	383.144	-0.395889
(S)-Multifidol 2-[apiosyl-(1->6)-glucoside]	-	M+CH3OH+H	C22H32O13	2.0796	pos	Organooxygen compounds	537.218	-0.0993156
Caffeic acid 4-O-glucuronide	-	M+ACN+Na	C15H16O10	2.0646	pos	Organooxygen compounds	420.089	-3.12444
3,4,5-trihydroxy-6-[2-hydroxy-4-(prop-2-en-1-yl)phenoxy]oxane-2-carboxylic acid	-	M+H-2H2O	C15H18O8	2.0197	pos	Organooxygen compounds	291.089	8.92507
Hippurate	Phenylalanine metabolism	M+CH3OH+H	C9H9NO3	2.0122	pos	-	212.091	-1.56015
Cadabicine	-	M+ACN+Na	C25H29N3O4	2.0047	pos	Organooxygen compounds	499.232	0.720788
3-Formyl-6-hydroxyindole	-	M+H	C9H7NO2	1.9749	pos	Indoles and derivatives	162.055	-2.15905
Aspartyl-Tryptophan	-	M+H-H2O	C15H17N3O5	1.9674	pos	Carboxylic acids and derivatives	302.113	-2.32956
6''-O-Malonylglycitin	Isoflavonoid biosynthesis	M+H-H2O	C25H24O13	1.9451	pos	Isoflavonoids	515.117	-2.16788
7,7'-Dihydroxy-6,8'-bicoumarin	-	M+H	C18H10O6	1.9451	pos	Coumarins and derivatives	323.054	-2.40161
Anibine	-	M+H-H2O	C11H9NO3	1.9451	pos	-	186.055	-1.93417
Jaceidin 4'-glucuronide	-	M+NH4	C24H24O14	1.9303	pos	Flavonoids	554.149	-3.06831
Feruloylagmatine	Arginine and proline metabolism	M+H	C15H22N4O3	1.9303	pos	-	307.176	-3.01977
3-phenyllactic acid	Tropane, piperidine and pyridine alkaloid biosynthesis;Biosynthesis of secondary metabolites	M+NH4	C9H10O3	1.9303	pos	-	184.097	-1.2279
Gamma-Glu-Leu	-	M+H	C11H20N2O5	1.9228	pos	-	261.144	-2.95759
Nepodin	-	M+H	C13H12O3	1.9153	pos	-	217.085	-2.50054
4-Coumaroyl-2-hydroxyputrescine	-	M+H-H2O	C13H18N2O3	1.8929	pos	Cinnamic acids and derivatives	233.128	-2.30462
Fructosamine	-	M+Na	C6H13NO5	1.8854	pos	Organooxygen compounds	202.067	-9.67187
ISOBERGAPTOL	-	M+CH3OH+H	C11H6O4	1.8779	pos	-	235.06	-2.90031
Alpha-Carboxy-delta-decalactone	-	M+ACN+Na	C11H18O4	1.8705	pos	Lactones	278.138	8.13421
2-O-ETHYL ASCORBIC ACID	-	M+H-2H2O	C8H12O6	1.863	pos	-	169.049	-1.75235
3-Fucosyllactose	-	M+ACN+H	C18H32O15	1.8405	pos	Organooxygen compounds	530.212	8.26253
3-Methyldioxyindole	Tryptophan metabolism	M+H	C9H9NO2	1.8405	pos	Indoles and derivatives	164.07	-2.35919
2-Indanone	-	M+H	C9H8O	1.8405	pos	-	133.065	-1.71874
Delta-Valerolactone	-	M+H-H2O	C5H8O2	1.8405	pos	-	83.0494	3.072
Hydroxy-lacosamide	-	M+ACN+Na	C13H18N2O5	1.8331	pos	Carboxylic acids and derivatives	346.139	6.53323
Allenolic acid	-	M+H	C13H12O3	1.8256	pos	-	217.085	-2.38276
P-Methylolphenol	-	M+H	C7H8O2	1.8033	pos	-	125.06	-0.960804
3-(2-Hydroxy-3-methoxyphenyl)-2-propenoic acid	-	M+H	C10H10O4	1.7961	pos	Cinnamic acids and derivatives	195.065	-2.1108
Coixinden A	-	M+H	C11H10O3	1.7888	pos	Indenes and isoindenes	191.07	-2.3795
4-Chlorobenzaldehyde	-	M+H	C7H5ClO	1.7667	pos	-	141.01	-2.0373
N-Acetylserotonin glucuronide	-	M+CH3OH+H	C18H22N2O8	1.7593	pos	Organooxygen compounds	427.17	-2.36047
AESCULIN	-	M+H	C15H16O9	1.7444	pos	Coumarins and derivatives	341.086	-2.50955
(+)-paeonilactone B	-	M+NH4	C10H12O4	1.7444	pos	-	214.107	-2.73394
N-Isobutyrylglycine	-	M+H-2H2O	C6H11NO3	1.7444	pos	-	110.06	0.362322
10-Acetoxyoleuropein	-	M+ACN+H	C27H34O15	1.7294	pos	Prenol lipids	640.222	-2.6548
N-[1-(4-methoxy-6-oxopyran-2-yl)-2-methylbutyl]acetamide	-	M+H-H2O	C13H19NO4	1.7221	pos	-	236.128	-1.67651
Tryptophol	Tryptophan metabolism	M+H-H2O	C10H11NO	1.7221	pos	-	144.08	-2.05413
A-L-Arabinofuranosyl-(1->2)-[a-D-mannopyranosyl-(1->6)]-D-mannose	-	M+ACN+H	C17H30O15	1.7072	pos	Organooxygen compounds	516.196	8.73314
Wampetin	-	M+H-2H2O	C21H18O6	1.7072	pos	Coumarins and derivatives	331.099	6.77726
Bacancosin	-	M+H-2H2O	C16H23NO8	1.6998	pos	-	322.128	-2.21901
P-Gal	-	M+ACN+H	C12H16O6	1.6998	pos	-	298.128	-2.78005
ALANYL-dl-PHENYLALANINE	-	M+H	C12H16N2O3	1.6998	pos	-	237.123	-2.03239
(+)-2,7-Dideoxypancratistatin	-	M+CH3OH+H	C14H15NO6	1.6774	pos	-	326.123	-2.53007
2'-O-Methylodoratol	-	M+ACN+H	C18H20O5	1.6699	pos	-	358.164	-3.10356
Nordazepam	-	M+ACN+H	C11H14O2	1.6699	pos	-	220.133	-2.89751
2-Aminoquinoline	-	M+H	C9H8N2	1.6699	pos	Quinolines and derivatives	145.076	-1.6222
S-Methylmethionine	-	2M+Na	C6H14NO2S+	1.6624	pos	Carboxylic acids and derivatives	351.14	4.33468
P-Coumaroylagmatine	Arginine and proline metabolism	M+H	C14H20N4O2	1.6475	pos	-	277.165	-2.83147
E-10-Hydroxynortriptyline	-	M+Na	C19H21NO	1.6401	pos	Dibenzocycloheptenes	302.149	-8.59104
2,6-Dimethoxyphenol	-	M+H	C8H10O3	1.6401	pos	Phenols	155.07	-2.19662
3,5-dihydroxy-2-(4-hydroxy-3-methoxyphenyl)-7-methoxy-4H-chromen-4-one	-	M+H-2H2O	C17H14O7	1.6326	pos	Flavonoids	295.059	-2.2534
Oxindole	Benzoxazinoid biosynthesis;Biosynthesis of secondary metabolites	M+H	C8H7NO	1.6252	pos	-	134.06	-1.62142
2-hydroxy-3-methyl-2-Cyclopenten-1-one	-	M+H	C6H8O2	1.6178	pos	-	113.06	-0.0693276
2-Hydroxy-8-methylchromene-2-carboxylate	-	M+H-H2O	C11H10O4	1.6103	pos	-	189.054	-2.37988
Acarbose (component 1)	-	M+H	C13H21NO7	1.5955	pos	-	304.138	-3.06768
3-Methoxy-4-hydroxyphenylethylene glycol	-	M+H-H2O	C9H12O4	1.5955	pos	-	167.07	-2.08734
N-(1-Deoxy-1-fructosyl)phenylalanine	-	M+H-H2O	C15H21NO7	1.588	pos	Carboxylic acids and derivatives	310.128	-2.33263
Menisdaurilide	-	M+NH4	C8H8O3	1.588	pos	-	170.081	-2.52287
Arbutin	Glycolysis / Gluconeogenesis	M+H-H2O	C12H16O7	1.5806	pos	Organooxygen compounds	255.086	-2.69493
N-Acetyl-2,3-dihydro-1H-pyrrole	-	M+H	C6H9NO	1.5731	pos	Pyrrolines	112.076	-0.0838521
Dhurrin	Cyanoamino acid metabolism;Biosynthesis of secondary metabolites	M+ACN+H	C14H17NO7	1.5656	pos	Organooxygen compounds	353.133	-3.19857
N5-(4-Methoxybenzyl)glutamine	-	M+H	C13H18N2O4	1.5656	pos	Carboxylic acids and derivatives	267.134	-0.775411
Chrysophanol 8-gentiobioside	-	M+H	C27H30O14	1.5507	pos	Anthracenes	579.17	-2.15975
Ferulic acid 4-O-glucuronide	-	M+H	C16H18O10	1.5209	pos	Organooxygen compounds	371.096	-2.35
2-Butanone, 4-(6-hydroxy-2-naphthalenyl)-	-	M+H	C14H14O2	1.5209	pos	-	215.106	-1.93032
3-(4-hydroxyphenyl)-6-methoxy-3,4-dihydro-2H-1-benzopyran-4,7-diol	-	M+NH4	C16H16O5	1.5134	pos	Isoflavonoids	306.133	-2.53366
PC-HSL	-	M+CH3OH+H	C13H13NO4	1.5134	pos	-	280.117	-2.78949
Apocynin	-	M+H	C9H10O3	1.5059	pos	-	167.07	-2.34119
1-Carbapen-2-em-3-carboxylic acid	Carbapenem biosynthesis	M+H	C7H7NO3	1.5059	pos	-	154.05	-2.13599
CROTALINE	-	M+H	C16H23NO6	1.4985	pos	-	326.159	-2.5024
Genipin	-	M+H	C11H14O5	1.4985	pos	Prenol lipids	227.091	-2.37631
1,2-Dihydroxymint lactone	-	M+H-2H2O	C10H14O4	1.4985	pos	-	163.075	-1.60115
1,6-dihydroxy-2-methylcyclohexa-2,4-dienecarboxylic acid	-	M+H	C8H10O4	1.4985	pos	-	171.065	-2.24689
3-Furoic acid	-	M+H	C5H4O3	1.4985	pos	Furans	113.023	0.0485406
Sophoraflavonoloside	Flavone and flavonol biosynthesis	M+H	C27H30O16	1.4835	pos	-	611.159	-2.37846
6-Hydroxynicotinic acid	Nicotinate and nicotinamide metabolism	M+NH4	C6H5NO3	1.4835	pos	Pyridines and derivatives	157.061	-1.51258
Succinic anhydride	-	M+ACN+H	C4H4O3	1.4835	pos	Carboxylic acids and derivatives	142.05	-2.25448
Thymine	Pyrimidine metabolism;Metabolic pathways	M+H	C5H6N2O2	1.4835	pos	Diazines	127.05	-1.30779
Clitocine	-	M+H-2H2O	C9H13N5O6	1.4611	pos	Organooxygen compounds	252.072	-2.0292
Eucommiol	-	M+ACN+H	C9H16O4	1.4537	pos	-	230.138	-2.69509
Rubrofusarin 6-[glucosyl-(1->3)-glucosyl-(1->6)-glucoside]	-	M+2H	C33H42O20	1.4391	pos	Organooxygen compounds	380.122	2.80094
3-(3-hydroxyphenyl)-7-methoxy-3,4-dihydro-2H-1-benzopyran-4-one	-	2M+NH4	C16H14O4	1.4317	pos	Isoflavonoids	558.217	8.15378
Dioscoretine	-	M+Na	C13H23NO3	1.4242	pos	Fatty Acyls	264.159	7.5507
Coniferol	Metabolic pathways;Phenylpropanoid biosynthesis;Biosynthesis of secondary metabolites	M+ACN+H	C10H12O3	1.4242	pos	-	222.112	-2.78527
4-hydroxy-3,5,6-trimethylpyran-2-one	-	M+H-H2O	C8H10O3	1.4242	pos	-	137.059	-1.88891
Estradiol-17beta 3-sulfate	-	M+ACN+H	C18H24O5S	1.4168	pos	Steroids and steroid derivatives	394.17	5.1456
Galactosyl 4-hydroxyproline	-	M+H-2H2O	C11H19NO8	1.4168	pos	Rhoeadine alkaloids	258.097	-1.94795
N-Acetylmannosamine	Metabolic pathways;Amino sugar and nucleotide sugar metabolism	M+H-H2O	C8H15NO6	1.4093	pos	Organooxygen compounds	204.086	-2.24127
5-Hydroxytryptophol glucuronide	-	M+ACN+H	C16H21NO7	1.4018	pos	Organooxygen compounds	381.165	-2.93296
Hydroxylated N-acetyl desmethyl frovatriptan	-	M+H-2H2O	C15H19N3O3	1.3869	pos	Indoles and derivatives	254.131	7.40079
1-(3,4-Dimethoxyphenyl)ethane-1,2-diol	-	M+H	C10H14O4	1.3869	pos	-	199.096	-2.15607
L-2-Amino-5-hydroxypentanoic acid	-	M+H	C5H11NO3	1.3869	pos	Carboxylic acids and derivatives	134.081	-1.67342
Coumarin	Phenylpropanoid biosynthesis;Biosynthesis of secondary metabolites	M+H	C9H6O2	1.3794	pos	Coumarins and derivatives	147.044	-2.19427
Dopamine glucuronide	-	M+CH3OH+H	C14H19NO8	1.372	pos	Organooxygen compounds	362.143	-4.22213
1-Isopropyl citrate	-	M+ACN+Na	C9H14O7	1.3645	pos	Carboxylic acids and derivatives	298.091	7.06072
2-Hydroxy-7-hydroxymethyl-2H-chromene-2-carboxylic acid	-	M+H-H2O	C11H10O5	1.3645	pos	-	205.049	-1.92175
DL-3,4-Dihydroxymandelic acid	-	M+H-H2O	C8H8O5	1.3645	pos	-	167.034	-1.79247
Estrone	Metabolic pathways	M+Na	C18H22O2	1.357	pos	Steroids and steroid derivatives	293.149	-8.68713
5-(3',5')-Dihydroxyphenyl-gamma-valerolactone	-	M+ACN+H	C11H14O4	1.3421	pos	Phenols	252.122	-2.91097
Enterolactone	-	M+ACN+Na	C18H18O4	1.3346	pos	Furanoid lignans	362.134	-6.47245
UQ1000000	-	M+ACN+H	C6H6O3	1.3346	pos	-	168.065	-2.64039
Gamma-Glutamyltyrosine	-	M+H	C14H18N2O6	1.3271	pos	Carboxylic acids and derivatives	311.123	-1.11411
7-Aminomethyl-7-carbaguanine	Metabolic pathways;Folate biosynthesis	M+H	C7H9N5O	1.3121	pos	Pyrrolopyrimidines	180.088	-2.66761
5-hydroxy-3-(4-hydroxy-3-methoxyphenyl)-7-methoxy-8-methyl-4H-chromen-4-one	-	M+2H	C18H16O6	1.2973	pos	Isoflavonoids	165.054	-1.94623
Dide-O-methylsimmondsin	-	M+ACN+Na	C14H21NO9	1.2898	pos	Organooxygen compounds	411.139	3.88395
Porphobilinogen	Metabolic pathways;Biosynthesis of secondary metabolites;Porphyrin and chlorophyll metabolism	M+Na	C10H14N2O4	1.2898	pos	Organonitrogen compounds	249.086	7.76233
Crotanecine	-	M+H	C8H13NO3	1.2898	pos	-	172.096	-2.14995
Trans-Grandmarin	-	M+NH4	C15H16O6	1.2749	pos	Coumarins and derivatives	310.128	-2.55126
PYROGALLIN	-	M+H	C11H8O4	1.2674	pos	-	205.049	-2.11622
Alpha,beta-Didehydrotryptophan	-	M+H	C11H10N2O2	1.2674	pos	-	203.081	-2.50143
4-Hydroxy-5-phenyl-1,3-oxazinan-2-one	-	M+H-2H2O	C10H11NO3	1.2674	pos	-	158.06	-1.66936
Dihydro-beta-Erythroidine	-	M+NH4	C16H21NO3	1.2524	pos	-	293.185	-2.76041
4-Pyridoxic acid	Metabolic pathways;Vitamin B6 metabolism	M+H	C8H9NO4	1.2524	pos	Pyridines and derivatives	184.06	-2.13091
8-(1,2-dihydroxypropan-2-yl)-9-hydroxy-2H,8H,9H-furo[2,3-h]chromen-2-one	-	M+NH4	C14H14O6	1.2373	pos	Coumarins and derivatives	296.112	-2.17201
(1R,3R)-3-Aminocyclopentanecarboxylic acid	-	M+H-2H2O	C6H11NO2	1.2223	pos	-	94.0653	1.61312
2,3-Dihydro-6-methoxy-2,2-dimethyl-4H-1-benzopyran-4-one	-	M+NH4	C12H14O3	1.2147	pos	Benzopyrans	224.128	-2.36391
(2-oxo-2,3-dihydro-1H-indol-3-yl)acetic acid	-	M+ACN+H	C10H9NO3	1.2072	pos	-	233.092	-2.64235
L-Dopa	Metabolic pathways;Isoquinoline alkaloid biosynthesis;Biosynthesis of secondary metabolites;Betalain biosynthesis;Tyrosine metabolism	M+H	C9H11NO4	1.1996	pos	Carboxylic acids and derivatives	198.076	-1.39984
Arginyl-Proline	-	M+2Na-H	C11H21N5O3	1.1921	pos	Carboxylic acids and derivatives	316.136	1.43587
(1S,3R,4S)-3,4-Dihydroxycyclohexanecarboxylic acid	-	M+ACN+H	C7H12O4	1.1921	pos	-	202.107	-2.95171
2-Amino-2-methyl-1-propanol	-	M+H	C4H11NO	1.1921	pos	-	90.0916	2.9371
(2S)-2-Methyl-4-(1H-purin-6-ylamino)-1-butanol	-	M+CH3OH+H	C10H15N5O	1.1845	pos	-	254.16	-3.05297
Plumbagin	-	M+CH3OH+H	C11H8O3	1.1845	pos	-	221.08	-2.63746
Valyl-Glutamate	-	M+ACN+H	C10H18N2O5	1.1543	pos	Carboxylic acids and derivatives	288.155	-2.71976
Styrene	Metabolic pathways	M+H	C8H8	1.1169	pos	Benzene and substituted derivatives	105.07	1.0192
Lysyl-Glutamine	-	M+2Na-H	C11H22N4O4	1.0945	pos	Carboxylic acids and derivatives	319.136	1.34583
Guanosine	Metabolic pathways;Purine metabolism	M+H	C10H13N5O5	1.072	pos	Purine nucleosides	284.098	-2.33972
NICOTINYL	-	M+H	C6H7NO	1.0644	pos	-	110.06	0.444423
5'-O-beta-D-Glucosylpyridoxine	-	M+H-2H2O	C14H21NO8	1.0494	pos	-	296.112	-1.87514
(S)-2,3-Dihydro-3,5-dihydroxy-2-oxo-3-indoleacetic acid 5-glucoside	-	M+CH3OH+H	C16H19NO10	1.0346	pos	Organooxygen compounds	418.133	-2.57346
Foeniculoside VIII	-	M+K	C16H28O8	1.0273	pos	Organooxygen compounds	387.139	-8.74612
3-(3-Indolyl)-2-oxopropanoic acid	-	M+H	C11H9NO3	1.0273	pos	-	204.065	-1.48124
L-DOPA 3'-glucoside	-	M+H	C15H21NO9	0.9975	pos	Carboxylic acids and derivatives	360.126	-8.13548
(S)-Acetoin	Butanoate metabolism	M+H	C4H8O2	0.9975	pos	-	89.06	2.95619
Fenimide	-	M+NH4	C13H15NO2	0.975	pos	-	235.144	-2.48031
Simmondsin	-	M+H-2H2O	C16H25NO9	0.9675	pos	Organooxygen compounds	340.138	-1.97802
(S)-ATPA	-	M+H	C10H16N2O4	0.96	pos	-	229.118	-2.36354
2-[2-hydroxy-3-(4-hydroxy-3-methoxyphenyl)propyl]benzene-1,3,5-triol	-	M+H+Na	C16H18O6	0.96	pos	Linear 1,3-diarylpropanoids	165.054	5.8442
4-Hydroxybenzaldehyde	Metabolic pathways	M+H	C7H6O2	0.96	pos	Organooxygen compounds	123.044	-0.57206
N-(3-Carboxypropyl)-L-glutamine	-	M+ACN+H	C9H16N2O5	0.9226	pos	-	274.139	-2.48685
Aminoacetone	Glycine, serine and threonine metabolism	M+H	C3H7NO	0.9226	pos	Organooxygen compounds	74.0604	5.55341
Xanthine	Metabolic pathways;Biosynthesis of secondary metabolites;Purine metabolism;Caffeine metabolism	M+H	C5H4N4O2	0.9152	pos	Imidazopyrimidines	153.04	-1.93031
L-Nicotine	Metabolic pathways;Tropane, piperidine and pyridine alkaloid biosynthesis;Biosynthesis of secondary metabolites	M+H	C10H14N2	0.9077	pos	-	163.123	-1.98431
Pyrrolidine	-	M+H	C4H9N	0.8928	pos	Pyrrolidines	72.0812	5.99769
Nalpha-Acetyl-L-arginine	-	M+H	C8H16N4O3	0.8853	pos	-	217.129	-1.9185
B-D-Glucuronopyranosyl-(1->3)-a-D-galacturonopyranosyl-(1->2)-L-rhamnose	-	M+2H	C18H28O17	0.8778	pos	Organooxygen compounds	259.075	6.19933
Parvisoflavone A	-	M+2Na-H	C20H16O6	0.8629	pos	Isoflavonoids	397.065	-3.63975
4-Acetamido-2-aminobutanoic acid	Metabolic pathways;Glycine, serine and threonine metabolism	M+H-2H2O	C6H12N2O3	0.8102	pos	Carboxylic acids and derivatives	125.071	-0.581765
2-Formyloxymethylclavam	-	M+H	C7H9NO4	0.7353	pos	-	172.06	-1.84309
Coixinden B	-	M+NH4	C13H14O4	0.7054	pos	Indenes and isoindenes	252.123	-2.05399
3-Isoxazolidinone	-	M+H	C3H5NO2	0.698	pos	Azolidines	88.0396	3.24018
8-Oxo-dGMP	-	M+ACN+Na	C10H14N5O8P	0.6905	pos	Purine nucleotides	427.075	3.50059
Alanyl-Aspartic acid	-	M+2Na-H	C7H12N2O5	0.6905	pos	Peptidomimetics	249.045	-5.18379
N-Acetyllactosamine	-	M+H-2H2O	C14H25NO11	0.683	pos	Organooxygen compounds	348.128	-1.73778
Cysteinyl-Hydroxyproline	-	M+ACN+H	C8H14N2O4S	0.6606	pos	Carboxylic acids and derivatives	276.101	-2.15704
Hexanoylcarnitine	-	M+ACN+H	C13H25NO4	0.6533	pos	Fatty Acyls	301.211	-2.64069
Mycosporine	-	M+H	C11H19NO6	0.6533	pos	-	262.128	-2.00913
L-Valine	Metabolic pathways;Biosynthesis of secondary metabolites;Valine, leucine and isoleucine degradation;Valine, leucine and isoleucine biosynthesis;2-Oxocarboxylic acid metabolism;ABC transporters;Biosynthesis of amino acids;Glucosinolate biosynthesis;Cyanoamino acid metabolism;Aminoacyl-tRNA biosynthesis;Pantothenate and CoA biosynthesis	M+H	C5H11NO2	0.6533	pos	Carboxylic acids and derivatives	118.086	-0.189294
1-Methyladenosine	-	M+H	C11H15N5O4	0.6459	pos	Purine nucleosides	282.119	-2.79034
Sarmentosin epoxide	-	M+H-2H2O	C11H17NO8	0.6459	pos	-	256.081	-2.35368
3-Hydroxypyridine	-	M+H	C5H5NO	0.6459	pos	-	96.0446	2.31187
Adenosine 3'-monophosphate	Purine metabolism	M+H	C10H14N5O7P	0.6385	pos	-	348.069	-2.51367
Arginyl-Tyrosine	-	M+H-H2O	C15H23N5O4	0.6385	pos	Carboxylic acids and derivatives	320.17	-6.19113
N-Acetyl-D-glucosaminate	-	M+H	C8H15NO7	0.6315	pos	-	238.092	-2.22706
4-Amino-4-cyanobutanoic acid	Cyanoamino acid metabolism	M+H-H2O	C5H8N2O2	0.624	pos	-	111.055	0.119156
D-Tagatose	Galactose metabolism	M+H-H2O	C6H12O6	0.6094	pos	Organooxygen compounds	163.06	-2.22277
2-Cyclopentene-1,4-dione	-	M+H	C5H4O2	0.6094	pos	-	97.0286	1.73983
Aniline	-	M+H	C6H7N	0.6094	pos	Benzene and substituted derivatives	94.0653	2.08455
L-Methionine S-oxide	Cysteine and methionine metabolism	M+H	C5H11NO3S	0.5948	pos	-	166.053	-0.688177
Acetylcholine	Glycerophospholipid metabolism	M+H	C7H15NO2	0.5948	pos	Organonitrogen compounds	146.117	-0.93805
(Z)-Resveratrol 3,4'-diglucoside	-	M+ACN+H	C26H32O13	0.5875	pos	Stilbenes	594.223	8.05628
2-amino-4-cyano-butanoic acid	-	M+H	C5H8N2O2	0.5875	pos	-	129.066	-1.38112
4-Methylimidazole	-	M+H	C4H6N2	0.5875	pos	-	83.0607	3.70464
Maltotriose	ABC transporters	M+Na	C18H32O16	0.5727	pos	Organooxygen compounds	527.157	-1.96885
L-Arginine	Metabolic pathways;Arginine biosynthesis;Biosynthesis of secondary metabolites;D-Arginine and D-ornithine metabolism;ABC transporters;Arginine and proline metabolism;Biosynthesis of amino acids;Aminoacyl-tRNA biosynthesis;Monobactam biosynthesis	M+H	C6H14N4O2	0.5727	pos	Carboxylic acids and derivatives	175.119	-1.91147
Choline	Metabolic pathways;Glycerophospholipid metabolism;ABC transporters;Glycine, serine and threonine metabolism	M+H	C5H13NO	0.5727	pos	Organonitrogen compounds	104.107	0.436506
2-Pyrrolidinone	-	M+H	C4H7NO	0.5727	pos	Pyrrolidines	86.0603	3.18979
N8-Acetylspermidine	-	M+H	C9H21N3O	0.5429	pos	Carboximidic acids and derivatives	188.175	-1.56922
Avenein	-	M+FA-H, 2M+FA-H, 3M-H, M-H, M+Cl	C14H18O8	1.5835	neg	-	359.097	-4.47172
FA(18:2(OH3))	-	M-H, 2M-H, M+Cl, M+Na-2H, M-H2O-H	C18H32O5	5.0317	neg	-	327.216	-4.17755
Astragalin	Biosynthesis of secondary metabolites;Flavone and flavonol biosynthesis	M-H, M+FA-H, M+Cl, 2M-H	C21H20O11	2.8915	neg	Flavonoids	447.091	-4.2551
Traumatic Acid	alpha-Linolenic acid metabolism;Biosynthesis of secondary metabolites	M-H, M+K-2H, M+Na-2H, M-H2O-H	C12H20O4	5.3153	neg	Fatty Acyls	227.128	-5.58677
3-O-feruloyl-D-quinic acid	-	M-H, M+Na-2H, 2M-H, 2M+FA-H	C17H20O9	2.6391	neg	-	367.102	-4.25039
L-Glutamine	Metabolic pathways;Glyoxylate and dicarboxylate metabolism;Arginine biosynthesis;Purine metabolism;ABC transporters;Nitrogen metabolism;Biosynthesis of amino acids;Pyrimidine metabolism;Alanine, aspartate and glutamate metabolism;Aminoacyl-tRNA biosynthesis	M-H, M+Cl, M-H2O-H	C5H10N2O3	0.5693	neg	Carboxylic acids and derivatives	145.061	-9.1604
Gluconic acid	Metabolic pathways;Pentose phosphate pathway;Biosynthesis of secondary metabolites;Carbon metabolism	M-H, M+Na-2H, M-H2O-H	C6H12O7	0.592	neg	Organooxygen compounds	195.05	-6.6181
Isomaltulose	-	M+Cl, M+FA-H, M-H	C12H22O11	0.6072	neg	-	377.084	-4.88762
4-O-(6-O-Acetyl-alpha-D-glucopyranosyl)-D-glucopyranose	-	M-H, M+FA-H, M-H2O-H	C14H24O12	0.5616	neg	-	383.118	-4.57875
Citric acid	Metabolic pathways;Glyoxylate and dicarboxylate metabolism;Biosynthesis of secondary metabolites;2-Oxocarboxylic acid metabolism;Carbon metabolism;Biosynthesis of amino acids;Alanine, aspartate and glutamate metabolism;Citrate cycle (TCA cycle)	M-H, M+FA-H, M-H2O-H	C6H8O7	0.9121	neg	Carboxylic acids and derivatives	191.018	-6.6838
Uridine	Pyrimidine metabolism;Metabolic pathways	M-H, M+FA-H, M+Cl	C9H12N2O6	0.9273	neg	Pyrimidine nucleosides	243.061	-4.5076
Pyro-L-glutaminyl-L-glutamine	-	M-H, 2M-H, M-H2O-H	C10H15N3O5	0.9121	neg	Carboxylic acids and derivatives	256.093	-4.02453
6''-O-Acetylholocalin	-	M+FA-H, 2M+FA-H, 2M-H	C16H19NO8	1.5148	neg	Organooxygen compounds	398.108	-4.98718
(Z)-3-(1-Formyl-1-propenyl)pentanedioic acid	-	M+Na-2H, 2M+FA-H, M-H2O-H	C9H12O5	1.6063	neg	Fatty Acyls	181.049	5.91845
Tarennoside	-	M-H, M+FA-H, M+Na-2H	C16H22O9	1.82	neg	-	357.118	-3.9739
Methionyl-Cysteine	-	M-H, 2M+FA-H, 2M-H	C8H16N2O3S2	3.5494	neg	Carboxylic acids and derivatives	503.118	7.71533
6''-Malonylgenistin	Isoflavonoid biosynthesis	M-H, 2M-H, M+Cl	C24H22O13	3.5877	neg	Isoflavonoids	517.097	-2.82341
Polyethylene, oxidized	-	M-H, M+Na-2H, M-H2O-H	C12H20O5	3.7182	neg	Keto acids and derivatives	243.123	-4.57989
1-Octen-3-yl 6-O-beta-D-xylopyranosyl-beta-D-glucopyranoside	-	M-H, M+FA-H, M+Cl	C19H34O10	4.1412	neg	-	467.211	-3.95802
(3,4,5,6-tetrahydroxyoxan-2-yl)methyl acetate	-	M-H, M+FA-H, M-H2O-H	C8H14O7	4.2271	neg	Organooxygen compounds	221.065	-5.32817
Medicagenic acid 3-O-beta-D-glucoside	-	M-H, M+FA-H, M-H2O-H	C36H56O11	4.6793	neg	Prenol lipids	663.373	-3.50885
Neryl glucoside	-	M-H2O-H, M+Na-2H, M-H	C16H28O6	4.9698	neg	Prenol lipids	315.18	-4.14436
Hoduloside VII	-	M-H, M+Cl, M+FA-H	C47H78O18	5.75	neg	Prenol lipids	929.51	-1.18158
9(S)-HpOTrE	alpha-Linolenic acid metabolism;Biosynthesis of secondary metabolites	M+Cl, 2M-H, M-H	C18H30O4	6.1634	neg	-	309.206	-5.21783
9-OxoOTrE	-	M-H, M+Cl, M+Na-2H	C18H28O3	7.2771	neg	-	291.195	-3.83723
E-Tokoferol	-	M-H, M+FA-H, M-H2O-H	C28H42O2	7.6009	neg	-	455.315	-4.3438
11-Deoxocucurbitacin I	-	M-H, M+FA-H, M+Cl	C30H44O6	8.2341	neg	-	499.305	-3.52652
Glycyrrhetaldehyde	-	M+FA-H, 2M-H, M-H	C30H46O3	9.48	neg	-	453.336	-4.10134
AS 1-5	-	M-H, M+Cl, M+FA-H	C40H77NO9	10.5784	neg	Sphingolipids	760.555	-3.83198
Soyacerebroside I	-	M-H, M+FA-H, M+Cl	C40H75NO9	10.4477	neg	Sphingolipids	758.539	-3.96392
Araliacerebroside	-	M-H, M+FA-H, M+Cl	C40H77NO10	10.306	neg	Sphingolipids	730.545	-3.81933
LPC(16:0)	Glycerophospholipid metabolism	M+FA-H, 2M+FA-H, M+Cl	C24H50NO7P	8.2729	neg	-	540.328	-4.56603
Gingerglycolipid A	-	M-H, M+Cl, M+FA-H	C33H56O14	7.2849	neg	Glycerolipids	721.362	-4.35978
3-trans-Caffeoyltormentic acid	-	M-H2O-H, M+Cl, M-H	C39H54O8	7.1616	neg	Prenol lipids	649.372	-3.76635
Sinapic acid	Metabolic pathways;Phenylpropanoid biosynthesis;Biosynthesis of secondary metabolites	M-H, 3M-H, M+FA-H	C11H12O5	1.897	neg	Cinnamic acids and derivatives	223.06	-5.25114
Methyl 6-O-galloyl-beta-D-glucopyranoside	-	M+Na-2H, M+K-2H, M-H	C14H18O10	1.8894	neg	Benzene and substituted derivatives	345.081	-0.524381
N-Acetylasparagine	-	2M+FA-H, 3M-H, 2M-H	C6H10N2O4	2.0795	neg	Carboxylic acids and derivatives	521.185	6.66993
2-Isopropylmalic acid	Metabolic pathways;Biosynthesis of secondary metabolites;Valine, leucine and isoleucine biosynthesis;2-Oxocarboxylic acid metabolism;Pyruvate metabolism;Biosynthesis of amino acids	M-H, M+Na-2H, M-H2O-H	C7H12O5	2.1718	neg	Fatty Acyls	175.06	-7.30585
Ethyl (S)-3-hydroxybutyrate glucoside	-	M-H, 2M-H, M-H2O-H	C12H22O8	2.3089	neg	Fatty Acyls	293.123	-3.81591
Tetrahydro-2,5-furan-diacetic acid	-	M+Na-2H, 2M-H, M-H2O-H	C8H12O5	2.6545	neg	Carboxylic acids and derivatives	209.044	6.21748
3-(2,4,5-trihydroxy-3-methoxyphenyl)propanoic acid	-	M+Na-2H, 3M-H, M-H	C10H12O6	2.8151	neg	Prenol lipids	249.039	5.72433
Cis-Mulberroside A	-	M-H, M+Cl, M+FA-H	C26H32O14	2.9068	neg	Stilbenes	567.169	-4.56154
Botryodiplodin	-	M+FA-H, 3M-H, 2M+FA-H	C7H12O3	2.9983	neg	Tetrahydrofurans	189.076	-8.55561
(1R,2R,4S)-p-Menthane-1,2,8-triol 8-glucoside	-	M-H2O-H, M+K-2H, M-H	C16H30O8	3.029	neg	Organooxygen compounds	331.175	-3.74417
Naematolone	-	2M-H, 2M+FA-H, M+Na-2H	C17H22O5	3.121	neg	Prenol lipids	611.289	4.62204
Pelargonidin 3-O-glucoside	Metabolic pathways;Anthocyanin biosynthesis;Biosynthesis of secondary metabolites	M-H, 2M-H, M+Cl	C21H20O10	3.2894	neg	-	431.097	-4.32062
Raffinose	ABC transporters;Galactose metabolism	M-H, M+FA-H	C18H32O16	0.7744	neg	Organooxygen compounds	503.16	-3.8316
Beta-Glucogallin	-	M-H2O-H, M+FA-H	C13H16O10	0.9121	neg	Tannins	377.072	6.93401
3-Acetamidobutanal	-	M-H, M+FA-H	C6H11NO2	1.0281	neg	Organooxygen compounds	174.076	-9.73752
4-O-Methylgalactinol	-	M-H2O-H, M+Na-2H	C13H24O11	1.3687	neg	Organooxygen compounds	377.107	-3.20025
4-Hydroxy-5-(3',4'-dihydroxyphenyl)-valeric acid-O-glucuronide	-	M-H, 2M-H	C17H22O11	1.4761	neg	Organooxygen compounds	401.107	-4.16851
Ginkgotoxin	-	M-H, M+FA-H	C9H13NO3	1.5835	neg	Pyridines and derivatives	228.087	-6.62323
2-METHOXYRESORCINOL	-	M-H, M+FA-H	C7H8O3	1.6981	neg	-	139.039	-9.34274
1-(9H-Pyrido[3,4-b]indol-1-yl)-1,4-butanediol	-	M+Cl, 2M+FA-H	C15H16N2O2	1.6981	neg	Harmala alkaloids	557.242	-1.50678
Ethyl 2-pyrrolecarboxylate	-	M+FA-H, 2M-H	C7H9NO2	1.7287	neg	Pyrroles	184.06	-8.62234
1-(3-Methyl-2-butenoyl)-6-apiosylglucose	-	M+Na-2H, 2M+FA-H	C16H26O11	1.7363	neg	Fatty Acyls	415.123	1.53924
Shikimic acid	Metabolic pathways;Phenylalanine, tyrosine and tryptophan biosynthesis;Biosynthesis of secondary metabolites;Biosynthesis of amino acids	M-H2O-H, M-H	C7H10O5	1.9875	neg	Organooxygen compounds	173.044	-7.92229
Isoplumbagin	-	M-H, M+FA-H	C11H8O3	2.0334	neg	Naphthalenes	233.044	-5.34659
(R)-1-O-[b-D-Glucopyranosyl-(1->6)-b-D-glucopyranoside]-1,3-octanediol	-	M+Cl, M+K-2H	C20H38O12	2.0411	neg	Fatty Acyls	507.17	-7.83744
2-Hexylbenzothiazole	-	M-H, 2M+FA-H	C13H17NS	2.1182	neg	Benzothiazoles	483.206	6.28567
N-[4'-hydroxy-(E)-cinnamoyl]-L-aspartic acid	-	M-H, 2M-H	C13H13NO6	2.1336	neg	Carboxylic acids and derivatives	278.066	-4.167
Chlorogenoquinone	-	M-H, 2M-H	C16H16O9	2.2098	neg	Organooxygen compounds	351.071	-3.82464
Glycylproline	-	M-H2O-H, M-H	C7H12N2O3	2.263	neg	Carboxylic acids and derivatives	171.076	-7.08676
Tyrosyl-Histidine	-	M-H2O-H, M+Na-2H	C15H18N4O4	2.3478	neg	Carboxylic acids and derivatives	299.112	-8.02904
19-Hydroxycinnzeylanol 19-glucoside	-	M-H, M+FA-H	C26H42O13	2.5168	neg	Prenol lipids	561.253	-4.28259
Formononetin	Isoflavonoid biosynthesis;Biosynthesis of secondary metabolites	M-H, M+FA-H	C16H12O4	2.6467	neg	Isoflavonoids	313.071	-5.0017
2,3-Dihydroxybenzoic acid	Biosynthesis of secondary metabolites	M-H2O-H, M-H	C7H6O4	2.7613	neg	Benzene and substituted derivatives	153.018	-8.59295
2',3,4,4',6'-pentahydroxychalcone 4'-O-beta-D-glucoside	Flavonoid biosynthesis	M-H, M+Cl	C21H22O11	2.7613	neg	-	449.107	-3.50753
Mangicrocin	-	M+Na-2H, M+FA-H	C45H50O19	2.861	neg	Steroids and steroid derivatives	939.273	-6.62784
Medicarpin 3-O-(6'-malonylglucoside)	-	M-H, M+FA-H	C25H26O12	2.9296	neg	Isoflavonoids	563.139	-5.35266
Ethyl 5-oxotetrahydro-2-furancarboxylate	-	M+Na-2H, 2M-H	C7H10O4	2.983	neg	Lactones	179.034	7.26646
Violanthin	-	M-H, M+Na-2H	C27H30O14	3.0137	neg	-	577.154	-3.45731
7-Hydroxy-4-methylphthalide O-[arabinosyl-(1->6)-glucoside]	-	M-H2O-H, M-H	C20H26O12	3.0137	neg	Organooxygen compounds	457.133	-4.78225
3-Methyl-3-butenyl apiosyl-(1->6)-glucoside	-	M-H2O-H, 2M-H	C16H28O10	3.0596	neg	Fatty Acyls	361.149	-3.55207
Limocitrin 3-rhamnoside	-	M-H, M+FA-H	C23H24O12	3.0749	neg	Flavonoids	491.118	-3.92047
Glucoconvallatoxoloside	-	M-H, M+Na-2H	C41H64O20	3.2817	neg	Steroids and steroid derivatives	875.388	-4.14733
Cis-p-Coumaric acid 4-[apiosyl-(1->2)-glucoside]	-	M-H2O-H, M+FA-H	C20H26O12	3.297	neg	Organooxygen compounds	503.129	-3.38218
N-Deschlorobenzoyl indomethacin	-	M-H2O-H, M-H	C12H13NO3	3.3506	neg	Indoles and derivatives	218.081	-6.19915
Deslanoside	-	M+Na-2H, M+Cl	C47H74O19	3.3963	neg	Steroids and steroid derivatives	963.461	3.77681
7-Hydroxyterpineol 8-glucoside	-	M+Cl, M+FA-H	C16H28O7	3.4423	neg	Organooxygen compounds	377.18	-6.53816
3,4,5-trihydroxycyclohex-1-ene-1-carboxylic acid	-	M-H2O-H, 2M-H	C7H10O5	3.4575	neg	Organooxygen compounds	155.034	-7.85079
Peumoside	-	M-H2O-H, M-H	C27H30O15	3.5341	neg	Flavonoids	593.149	-6.10564
3,4,5-trihydroxy-6-[(3-methylbutanoyl)oxy]oxane-2-carboxylic acid	-	M+K-2H, 2M-H	C11H18O8	3.5801	neg	Organooxygen compounds	315.05	3.18341
Encelin	-	M-H2O-H, M-H	C15H16O3	3.6414	neg	Prenol lipids	225.091	-4.87334
Methyl (2E,4Z,6E,8E,10E)-4,8-dimethyl-12-oxo-2,4,6,8,10-dodecapentaenoate	-	M-H2O-H, M-H	C15H18O3	3.6414	neg	Prenol lipids	245.117	-4.69271
RHAPONTIN	-	M-H2O-H, M-H	C21H24O9	3.6797	neg	-	419.133	4.44493
4-methoxy-6-[3-(4-methoxyphenyl)oxiran-2-yl]-5,6-dihydro-2H-pyran-2-one	-	M-H2O-H, 2M+FA-H	C15H16O5	3.8341	neg	Phenol ethers	257.081	-4.17239
3,8-Dihydroxy-6-methoxy-7(11)-eremophilen-12,8-olide	-	M-H, M+K-2H	C16H24O5	3.8418	neg	Prenol lipids	333.108	-3.76015
2-[4-(3-Hydroxypropyl)-2-methoxyphenoxy]-1,3-propanediol 1-xyloside	-	M-H2O-H, M+Na-2H	C18H28O9	3.8806	neg	Organooxygen compounds	409.149	-3.54747
Medicocarpin	Isoflavonoid biosynthesis	M+FA-H, 2M+FA-H	C22H24O9	3.9344	neg	Isoflavonoids	909.263	-5.90065
5-Hexyltetrahydro-2-oxo-3-furancarboxylic acid	-	M-H2O-H, M-H	C11H18O4	3.9575	neg	Lactones	213.112	-4.86702
D-erythro-L-galacto-Nonulose	-	M+Na-2H, 3M-H	C9H18O9	4.4054	neg	Organooxygen compounds	291.071	4.8718
Sebacic acid	-	M-H, M+Na-2H	C10H18O4	4.4132	neg	Fatty Acyls	201.112	-5.74229
Afzelin	Flavone and flavonol biosynthesis	M-H2O-H, M-H	C21H20O10	4.4843	neg	-	431.097	-3.17148
Lucidenic acid D1	-	M-H2O-H, M+Cl	C27H34O7	4.4996	neg	Prenol lipids	505.19	9.47957
Dehydroepiandrosterone sulfate	-	M+K-2H, 2M-H	C19H28O5S	4.5778	neg	Steroids and steroid derivatives	405.117	8.34907
Cephalosporin C	Metabolic pathways	M+Cl, M+FA-H	C16H21N3O8S	4.6013	neg	Organonitrogen compounds	460.102	-2.76778
Vomifoliol 9-[xylosyl-(1->6)-glucoside]	-	M-H, M+FA-H	C24H38O12	4.656	neg	Fatty Acyls	563.232	-3.9282
Pteroside A	-	M-H, 2M+FA-H	C21H30O8	4.86	neg	Organooxygen compounds	865.404	-3.9764
N-Jasmonoylisoleucine	-	M-H2O-H, M-H	C18H29NO4	4.8834	neg	Carboxylic acids and derivatives	304.191	-3.42989
2,2'-(3-methylcyclohexane-1,1-diyl)diacetic acid	-	M-H, M+Na-2H	C11H18O4	4.9307	neg	-	213.112	-5.53312
Menthone lactone	-	M-H, M+Na-2H	C10H18O2	4.9307	neg	Lactones	169.122	-7.36907
2-hydroxy-3-[4-hydroxy-3-(3-methylbut-2-en-1-yl)phenyl]propanoic acid	-	M-H2O-H, M-H	C14H18O4	4.9149	neg	Phenylpropanoic acids	249.116	8.82188
Glycinoeclepin C	-	M-H2O-H, M+Na-2H	C29H38O8	5.0239	neg	Prenol lipids	495.242	6.95341
Digoxigenin monodigitoxoside	-	M-H2O-H, M+Na-2H	C29H44O8	5.063	neg	Organooxygen compounds	501.285	-2.08986
Ganosporeric acid A	-	M-H2O-H, M+K-2H	C30H38O8	5.2211	neg	Fatty Acyls	563.212	7.51048
Diflorasone	-	M-H2O-H, M-H	C26H32F2O7	5.2368	neg	Steroids and steroid derivatives	475.196	4.1317
2,3-dinor-8-epi-prostaglandin F1alpha	-	M-H, M+Cl	C18H32O5	5.3229	neg	-	327.216	-4.29175
Cheirotoxol	-	M-H2O-H, M+K-2H	C35H54O15	5.3853	neg	Steroids and steroid derivatives	695.328	-0.452468
9,10,13-Trihydroxy-11-octadecenoic acid	Linoleic acid metabolism	M-H, M+Cl	C18H34O5	5.3931	neg	-	329.232	-4.25264
Pubesenolide	-	M-H, M+FA-H	C28H42O5	6.092	neg	Prenol lipids	503.3	-3.49645
Gibberellin A43	-	M-H, M+FA-H	C20H26O8	6.1712	neg	Prenol lipids	393.157	3.37726
GYROPHORIC ACID	-	M-H, M+Na-2H	C24H20O10	6.5817	neg	-	467.096	-4.27438
9,10-DiHOME	Linoleic acid metabolism	M-H2O-H, M-H	C18H34O4	6.7997	neg	-	313.237	-4.44422
Fistuloside A	-	M+Cl, M+FA-H	C39H62O13	6.9322	neg	Carboxylic acids and derivatives	783.414	-0.554914
LPC(18:3)	Glycerophospholipid metabolism	M+Cl, M+FA-H	C26H48NO7P	7.2849	neg	-	562.313	-4.14558
9(S)-HODE	Linoleic acid metabolism	M-H, M+Cl	C18H32O3	7.6548	neg	-	295.226	-4.66482
Lucidenic acid N	-	M-H, M+Na-2H	C27H40O6	7.9567	neg	Prenol lipids	459.273	-3.78093
Phaeophorbide b	-	M-H, M+Na-2H	C35H34N4O6	8.0614	neg	Tetrapyrroles and derivatives	605.238	-3.65343
9,10-epoxy-18-hydroxyoctadecanoic acid	-	M-H, M+Na-2H	C18H34O4	8.1237	neg	-	313.237	-4.08432
LysoPC(17:0)	Glycerophospholipid metabolism	M+Cl, M+FA-H	C25H52NO7P	8.6263	neg	Glycerophospholipids	554.344	-4.31117
Isodesmosine	-	M-H, M+Na-2H	C24H40N5O8+	8.7221	neg	Carboxylic acids and derivatives	525.281	1.5832
MEDICA 16	-	M-H, M+Na-2H	C20H38O4	8.761	neg	-	341.268	-4.65227
LysoPC(18:0)	Glycerophospholipid metabolism	M+Cl, M+FA-H	C26H54NO7P	8.9403	neg	Glycerophospholipids	568.36	-4.33533
Perulactone	-	M-H, M+Na-2H	C30H46O7	9.1361	neg	Steroids and steroid derivatives	539.297	-4.21071
Pheophorbide A	Biosynthesis of secondary metabolites;Porphyrin and chlorophyll metabolism	M-H, M+Na-2H	C35H36N4O5	9.0502	neg	-	591.259	-3.69667
LPE(16:0)	-	M-H, 2M-H	C21H44NO7P	8.3898	neg	-	452.276	-4.32522
Camelliagenin B	-	M-H, M+FA-H	C30H48O5	7.7176	neg	Prenol lipids	533.346	-4.44944
Ganoderiol G	-	M-H, M+Na-2H	C31H52O5	9.9762	neg	Prenol lipids	525.354	-4.14899
PE-NMe(18:0/18:3(6Z,9Z,12Z))	-	M+Cl, M+FA-H	C42H78NO8P	10.3952	neg	Glycerophospholipids	800.542	-3.58835
Hexadecanedioic acid	Metabolic pathways;Cutin, suberine and wax biosynthesis	M-H, M+Na-2H	C16H30O4	7.3685	neg	Fatty Acyls	285.206	-4.41754
2,5-Diisopropyl-4-methylphenol	-	M+Na-2H, 2M+FA-H	C13H20O	5.8854	neg	Prenol lipids	429.299	5.99593
Lyciumoside III	-	M-H, M+Cl	C32H56O13	5.0474	neg	Prenol lipids	647.363	-2.44182
Corchoroside A	-	M-H2O-H, M+Na-2H	C29H42O9	5.0239	neg	Steroids and steroid derivatives	555.242	-1.76579
Vitamin D2 3-glucuronide	-	M-H2O-H, M+Cl	C34H52O7	4.8041	neg	Steroids and steroid derivatives	553.357	6.10386
27-O-demethylrifabutin	-	M-H2O-H, M+Na-2H	C45H60N4O11	4.7265	neg	Benzene and substituted derivatives	853.404	2.56381
Corchorosol A	-	M-H2O-H, M+K-2H	C29H44O9	4.6955	neg	Steroids and steroid derivatives	517.28	-1.54762
3,11,12-Trihydroxy-1(10)-spirovetiven-2-one	-	M-H2O-H, M+Na-2H	C15H24O4	4.6403	neg	Prenol lipids	249.149	-4.1405
4-hydroxy-3-methyl-4-phenylbutan-2-one	-	M+Na-2H, M+FA-H	C11H14O2	4.6403	neg	Benzene and substituted derivatives	199.075	6.47301
Zedoarol	-	M-H2O-H, M-H	C15H18O3	4.5778	neg	Prenol lipids	245.117	-4.51766
Prostaglandin F2a	Metabolic pathways;Arachidonic acid metabolism	M-H2O-H, M-H	C20H34O5	4.5149	neg	Fatty Acyls	335.221	-4.10212
Desacetyllaurenobiolide	-	M-H2O-H, M+Cl	C15H20O3	4.4054	neg	Prenol lipids	229.122	-4.34624
2-(3-Carboxy-3-aminopropyl)-L-histidine	-	M+Na-2H, M+FA-H	C10H16N4O4	4.3275	neg	Carboxylic acids and derivatives	301.118	1.38984
Gibberellin A110	-	M+Na-2H, M+K-2H	C20H28O5	3.8264	neg	Prenol lipids	385.149	-4.51476
Azelaic acid	-	M-H2O-H, M-H	C9H16O4	3.7413	neg	Fatty Acyls	187.096	-6.7452
D-Urobilin	Metabolic pathways;Biosynthesis of secondary metabolites;Porphyrin and chlorophyll metabolism	M-H, M+K-2H	C33H40N4O6	3.6644	neg	Tetrapyrroles and derivatives	625.269	0.323929
1-Oleoylglycerophosphoinositol	-	M-H2O-H, M+K-2H	C27H51O12P	3.5033	neg	Glycerophospholipids	635.252	9.32583
(-)-Irofulven	-	M-H2O-H, M-H	C15H18O3	3.4499	neg	-	245.117	-4.75251
3-(2-Methylpropylidene)-3alpha,4-dihydro-1(3H)-isobenzofuranone	-	M-H2O-H, M-H	C12H14O2	3.4192	neg	Isobenzofurans	189.091	-6.66999
3-Methyl-5-pentyl-2-furanpropanoic acid	-	M-H2O-H, M-H	C13H20O3	3.4116	neg	Fatty Acyls	205.122	-5.4502
2-(3-Hydroxy-4-methylphenyl)-5-methyl-4-hexen-3-one	-	M-H, M+FA-H	C14H18O2	3.1441	neg	Prenol lipids	263.128	-5.23162
Osthol	-	M-H2O-H, M-H	C15H16O3	3.1441	neg	-	243.101	-4.9485
3-(1-Hydroxymethyl-1-propenyl)pentanedioic acid	-	M-H2O-H, 3M-H	C9H14O5	3.1364	neg	Fatty Acyls	605.243	-5.97944
3-carboxy-4-methyl-5-pentyl-2-furanpropanoic acid	-	M-H2O-H, M-H	C14H20O5	3.1057	neg	Fatty Acyls	267.123	-3.89274
Kanokoside A	-	M-H, M+Na-2H	C21H32O12	3.0903	neg	Carboxylic acids and derivatives	475.179	-5.79762
Xi-8,9-Dehydrotheaspirone	-	M-H2O-H, M-H	C13H18O2	3.006	neg	Organooxygen compounds	205.122	-5.79056
Ascorbigen	-	M+FA-H, 2M-H	C15H15NO6	2.9983	neg	Furofurans	609.183	4.38349
2-(2,4-dihydroxyphenyl)-2-oxoacetic acid	-	M-H, 2M-H	C8H6O5	2.9983	neg	Phenols	181.013	-6.59481
Citroside A	-	M-H2O-H, M-H	C19H30O8	2.9677	neg	Prenol lipids	385.185	-6.26293
Leonoside B	-	M-H, M+FA-H	C36H48O19	2.9601	neg	Organooxygen compounds	783.268	-4.34254
Chrysoeriol 7-O-(6''-malonyl-glucoside)	-	M-H, M+Na-2H	C25H24O14	2.9524	neg	Flavonoids	547.108	-2.48118
Isocolumbin	-	M-H2O-H, M-H	C20H22O6	2.8534	neg	Naphthopyrans	339.122	-3.97541
Medicarpin 3-O-glucoside-6'-malonate	Isoflavonoid biosynthesis	M-H, M+FA-H	C25H26O12	2.8381	neg	-	563.138	-3.93994
3-Methylellagic acid 8-(2-acetylrhamnoside)	-	M-H, M+FA-H	C23H20O13	2.7998	neg	Lignan glycosides	549.086	-2.59096
Cotinine glucuronide	-	M-H2O-H, M-H	C16H20N2O7	2.7922	neg	Pyrimidine nucleotides	351.118	-3.76649
Tsibulin 2	-	M-H2O-H, M+Na-2H	C11H18O2	2.7769	neg	Organooxygen compounds	203.107	-7.03296
Gallic acid	-	M-H2O-H, M-H	C7H6O5	2.6008	neg	Benzene and substituted derivatives	169.013	-8.03036
Doxepin N-oxide glucuronide	-	M-H2O-H, M+Cl	C25H30NO8+	2.5704	neg	Benzoxepines	507.164	-2.97809
Herierin III	-	M-H, M+Na-2H	C8H10O4	2.5704	neg	Pyrans	191.034	-7.38913
1H-Indol-3-ylacetyl-myo-inositol	-	M-H, M+FA-H	C16H19NO7	2.5628	neg	Indoles and derivatives	336.108	-3.78393
Lucuminic acid	-	M-H, M+Na-2H	C19H26O12	2.5008	neg	Organooxygen compounds	445.133	-4.15742
4-Demethylsimmondsin 2'-(E)-ferulate	-	M-H, M+FA-H	C25H31NO12	2.4168	neg	Cinnamic acids and derivatives	536.177	-1.36202
Ethyl aconitate	-	M-H2O-H, M+Na-2H	C8H10O6	2.3784	neg	Carboxylic acids and derivatives	183.029	-6.42131
Glicophenone	-	M+Na-2H, 2M-H	C20H22O6	2.3631	neg	Stilbenes	379.113	-8.72112
Niazimin A	-	M-H, M+FA-H	C18H25NO8	2.3631	neg	Organooxygen compounds	382.149	-4.2956
O-malonyl-L-carnitine	-	M-H2O-H, M-H	C10H17NO6	2.3396	neg	Fatty Acyls	246.097	-3.3035
5'-((Z)-Feruloyl) 3-(2'-methylarabinosylxylose)	-	M-H2O-H, M+FA-H	C21H28O12	2.3243	neg	Cinnamic acids and derivatives	453.138	-4.48322
Epoxyeremopetasinorol	-	M-H2O-H, M-H	C13H20O3	2.3089	neg	Oxanes	205.122	-5.32653
Threo-Syringoylglycerol	-	M-H2O-H, M-H	C11H16O6	2.2707	neg	Phenols	243.086	-4.76591
Dihydroconiferin	-	M-H, M+Cl	C16H24O8	2.263	neg	Organooxygen compounds	379.113	-4.76522
1-(sn-glycero-3-phospho)-1D-myo-inositol	-	M-H, M+FA-H	C9H19O11P	2.263	neg	Glycerophospholipids	379.06	3.27674
Kanokoside B	-	M+Cl, M+FA-H	C21H34O12	2.2479	neg	-	523.201	-4.05214
3,4,5-trihydroxy-6-[2-(3-phenylbut-3-en-1-yl)phenoxy]oxane-2-carboxylic acid	-	M-H2O-H, M+Cl	C22H24O7	2.2479	neg	Organooxygen compounds	435.112	-8.54949
3-O-Caffeoylshikimic acid	-	M-H, M+Cl	C16H16O8	2.2479	neg	Cinnamic acids and derivatives	371.06	-3.53163
Tipredane	-	M-H, M+Na-2H	C22H31FO2S2	2.1336	neg	Steroids and steroid derivatives	409.17	5.50382
3-Isopropenylpentanedioic acid	-	M+Na-2H, M+FA-H	C8H12O4	2.1336	neg	Fatty Acyls	193.049	6.72529
Elenaic acid	-	M-H2O-H, M-H	C11H14O6	2.1106	neg	Carboxylic acids and derivatives	241.071	-4.82903
NNAL-N-glucuronide	-	M+Cl, M+K-2H	C16H24N3O8+	2.0488	neg	Organooxygen compounds	423.103	-7.08411
Benzyl O-[arabinofuranosyl-(1->6)-glucoside]	-	M-H2O-H, M+FA-H	C18H26O10	2.018	neg	Organooxygen compounds	447.149	-2.48694
Phloroacetophenone 6'-[xylosyl-(1->6)-glucoside]	-	M-H, M+Cl	C21H30O13	1.897	neg	Organooxygen compounds	489.159	-3.9544
Serylglycine	-	M-H2O-H, 2M+FA-H	C5H10N2O4	1.8353	neg	Carboxylic acids and derivatives	369.119	-7.83602
1-O-2'-Hydroxy-4'-methoxycinnamoyl-b-D-glucose	-	M-H, M-H2O-H	C16H20O9	1.82	neg	Cinnamic acids and derivatives	355.102	-3.53654
(2S,4S)-Monatin	-	M-H, M+Cl	C14H16N2O5	1.7669	neg	Carboxylic acids and derivatives	291.098	-2.3511
(±)-Taxifolin	-	M-H2O-H, M-H	C15H12O7	1.7516	neg	-	303.05	-3.50853
Isomugineic acid	-	M-H2O-H, M+K-2H	C12H20N2O8	1.744	neg	Carboxylic acids and derivatives	301.103	-3.91906
3-Methoxyanthranilate	Tryptophan metabolism	M-H2O-H, M-H	C8H9NO3	1.7057	neg	Benzene and substituted derivatives	166.05	-7.53764
Erbstatin Analog	-	M-H, M+FA-H	C10H10O4	1.6063	neg	-	239.055	-6.5133
(R)-Pantothenic acid 4'-O-b-D-glucoside	-	M-H, 2M-H	C15H27NO10	1.4761	neg	Fatty Acyls	380.155	-4.16119
Glucogallin	-	M-H2O-H, M-H	C13H16O10	1.4299	neg	-	331.066	-3.42546
5-Hydroxy-L-tryptophan	Metabolic pathways;Tryptophan metabolism	M-H2O-H, M-H	C11H12N2O3	1.2684	neg	Indoles and derivatives	219.076	-6.10563
6-tuliposide A	-	M-H2O-H, M+FA-H	C11H18O8	1.1828	neg	-	259.081	-3.66781
3,4,5-trihydroxy-6-[(2-methylpropanoyl)oxy]oxane-2-carboxylic acid	-	M-H2O-H, M-H	C10H16O8	0.9121	neg	Organooxygen compounds	245.066	-3.93993
6-(2-carboxy-2-methylethoxy)-3,4,5-trihydroxyoxane-2-carboxylic acid	-	M-H2O-H, M+FA-H	C10H16O9	0.9045	neg	Organooxygen compounds	261.061	-3.41377
Ethyl glucuronide	-	M-H, 2M-H	C8H14O7	0.9045	neg	Organooxygen compounds	221.065	-5.49843
L-Asparagine	Metabolic pathways;Biosynthesis of secondary metabolites;Cyanoamino acid metabolism;Biosynthesis of amino acids;Alanine, aspartate and glutamate metabolism;Aminoacyl-tRNA biosynthesis	M-H2O-H, M-H	C4H8N2O3	0.5693	neg	Carboxylic acids and derivatives	131.045	-9.92707
D-glycero-L-galacto-Octulose	-	M-H, M+Cl	C8H16O8	0.5845	neg	Organooxygen compounds	275.053	-5.11489
2-Amino-4-[(2-hydroxy-1-oxopropyl)amino]butanoic acid	-	M-H2O-H, M-H	C7H14N2O4	0.592	neg	Carboxylic acids and derivatives	189.087	-6.06605
Dulcitol	Metabolic pathways;Galactose metabolism	M-H, M+Cl	C6H14O6	0.592	neg	-	217.047	-7.00558
Aldobiouronic acid D3	-	M-H, M+FA-H	C11H18O11	0.5845	neg	Organooxygen compounds	325.076	-3.58286
6,7-Dimethyl-8-(1-D-ribityl)lumazine	Metabolic pathways;Biosynthesis of secondary metabolites;Riboflavin metabolism	M+K-2H, M+FA-H	C13H18N4O6	0.63	neg	Pteridines and derivatives	371.118	-6.94491
3,4,5-trihydroxy-6-(2-hydroxyethoxy)oxane-2-carboxylic acid	-	M-H, M+FA-H	C8H14O8	0.6452	neg	Organooxygen compounds	237.06	-5.13239
D-Erythroascorbic acid 1'-a-D-glucoside	-	M-H, M+FA-H	C11H16O10	0.6527	neg	Organooxygen compounds	307.066	-4.28217
Gamma-L-Glutamyl-L-methionine sulfoxide	-	M-H2O-H, M+Cl	C10H18N2O6S	0.6527	neg	Carboxylic acids and derivatives	329.063	-2.28716
Malic acid	Metabolic pathways;Glyoxylate and dicarboxylate metabolism;Biosynthesis of secondary metabolites;Carbon metabolism;Pyruvate metabolism;Carbon fixation in photosynthetic organisms;Citrate cycle (TCA cycle)	M-H2O-H, M-H	C4H6O5	0.6601	neg	Hydroxy acids and derivatives	133.013	-9.83738
L-Ascorbic acid	Metabolic pathways;Glutathione metabolism;Biosynthesis of secondary metabolites;Ascorbate and aldarate metabolism	M-H2O-H, M-H	C6H8O6	0.6601	neg	-	175.024	-7.33064
Nalpha-Acetyl-L-glutamine	-	M-H2O-H, M-H	C7H12N2O4	0.6601	neg	-	187.071	-6.33888
Semilicoisoflavone B	-	M-H2O-H, M+Na-2H	C20H16O6	0.6601	neg	Isoflavonoids	333.076	-1.87236
L-trans-alpha-Amino-2-carboxycyclopropaneacetic acid	-	M-H, 2M-H	C6H9NO4	0.6601	neg	Carboxylic acids and derivatives	158.045	-8.2331
6-{[(3,4,5-trihydroxy-6-methyloxan-2-yl)oxy]methyl}oxane-2,3,4,5-tetrol	-	M-H2O-H, M-H	C12H22O10	0.6527	neg	Organooxygen compounds	325.113	-3.93338
Vicianose	-	M-H, 2M-H	C11H20O10	0.6527	neg	-	311.097	-4.18664
6-(butanoyloxy)-3,4,5-trihydroxyoxane-2-carboxylic acid	-	M+FA-H, 2M+FA-H	C10H16O8	0.6527	neg	Organooxygen compounds	309.081	-5.3561
Glycerophosphocholine	Ether lipid metabolism;Glycerophospholipid metabolism	M+Cl	C8H20NO6P	0.5845	neg	Glycerophospholipids	292.071	-5.21686
{[(2Z)-2-(phenylmethylidene)heptyl]oxy}sulfonic acid	-	M+Cl	C14H20O4S	0.5997	neg	Benzene and substituted derivatives	319.079	3.65253
Osmanthuside A	-	M+Cl	C23H26O9	0.6072	neg	Cinnamic acids and derivatives	481.131	8.18909
Galactosylglycerol	Glycerolipid metabolism;Galactose metabolism	M-H	C9H18O8	0.63	neg	Glycerolipids	253.092	-4.2019
ID11614	-	M+Cl	C11H13N3S	0.6375	neg	Diazinanes	254.05	-9.83105
Ustiloxin C	-	M+Na-2H	C23H34N4O10S	0.6375	neg	Carboxylic acids and derivatives	579.176	2.55291
Ascorbic acid	Metabolic pathways;Glutathione metabolism;Biosynthesis of secondary metabolites;Ascorbate and aldarate metabolism	M+FA-H	C6H8O6	0.6452	neg	Dihydrofurans	221.029	-7.3732
6-Feruloylglucose 2,3,4-trihydroxy-3-methylbutylglycoside	-	M+Na-2H	C21H30O12	0.6452	neg	Fatty Acyls	495.146	-5.93923
Uridine diphosphate-N-acetylglucosamine	Metabolic pathways;Amino sugar and nucleotide sugar metabolism;Vancomycin resistance	M-H	C17H27N3O17P2	0.7286	neg	Pyrimidine nucleotides	606.072	-3.58823
2-Keto-glutaramic acid	Alanine, aspartate and glutamate metabolism	M+FA-H	C5H7NO4	0.7898	neg	Keto acids and derivatives	190.034	-8.80252
2-Methyl-4-oxopentanedioic acid	-	M+FA-H	C6H8O5	0.8051	neg	Keto acids and derivatives	205.034	-8.39486
Lepidimoic acid	-	2M-H	C12H18O10	0.8815	neg	Organooxygen compounds	643.17	-4.21218
3-Hydroxy-L-proline	-	M+FA-H	C5H9NO3	0.8969	neg	Carboxylic acids and derivatives	176.055	-9.15363
Glucosamine	Metabolic pathways;Amino sugar and nucleotide sugar metabolism	M-H2O-H	C6H13NO5	0.9273	neg	Organooxygen compounds	160.06	-7.03342
L-Tyrosine	Metabolic pathways;Biosynthesis of secondary metabolites;Tyrosine metabolism;Thiamine metabolism;Ubiquinone and other terpenoid-quinone biosynthesis;2-Oxocarboxylic acid metabolism;Betalain biosynthesis;Biosynthesis of amino acids;Glucosinolate biosynthesis;Isoquinoline alkaloid biosynthesis;Cyanoamino acid metabolism;Phenylpropanoid biosynthesis;Phenylalanine metabolism;Aminoacyl-tRNA biosynthes…	M-H	C9H11NO3	0.9582	neg	Carboxylic acids and derivatives	180.065	-6.48764
Deoxypyridinoline	-	M+Cl	C18H28N4O7	0.9582	neg	Carboxylic acids and derivatives	447.162	-8.7045
N-lactoyl-Tryptophan	-	M+Cl	C14H16N2O4	0.9737	neg	Carboxylic acids and derivatives	311.079	-3.58483
5-Hydroxypyrazinamide	-	M+FA-H	C5H5N3O2	0.9969	neg	Diazines	184.035	-8.31689
Deoxyuridine	Pyrimidine metabolism	M+FA-H	C9H12N2O5	1.0126	neg	Pyrimidine nucleosides	273.072	-4.75412
N-Acetyl-9-O-lactoylneuraminic acid	-	M-H2O-H	C14H23NO11	1.0281	neg	Carboxylic acids and derivatives	362.108	-3.53851
3-Methylhippuric acid	-	M-H	C10H11NO3	1.0358	neg	-	192.065	-6.28618
4-(2-amino-3-hydroxyphenyl)-4-oxobutanoic acid O-glucoside	-	M+FA-H	C16H21NO9	1.0358	neg	Organooxygen compounds	416.118	-4.57499
Herierin IV	-	M+FA-H	C8H10O4	1.0435	neg	Pyrans	215.055	-6.82448
N2-Succinyl-L-glutamic acid 5-semialdehyde	Metabolic pathways;Arginine and proline metabolism	M-H	C9H13NO6	1.0591	neg	Carboxylic acids and derivatives	230.066	-4.44113
6-Hydroxy-1H-indole-3-acetamide	-	M+FA-H	C10H10N2O2	1.0746	neg	Indoles and derivatives	235.071	-6.38171
Ribonolactone	-	M-H	C5H8O5	1.0899	neg	Organooxygen compounds	147.029	-8.60597
Nebularine	-	M-H	C10H12N4O4	1.0899	neg	Purine nucleosides	251.076	-9.27829
5-Hydroxymaltol	-	M+FA-H	C6H6O4	1.1131	neg	Pyrans	187.024	-8.74021
Leu-Asp-OH	-	M-H	C15H18N2O8	1.1208	neg	-	353.098	-4.00345
2-O-Galloylsucrose	-	M-H	C19H26O15	1.2373	neg	Benzene and substituted derivatives	493.118	-3.49515
Acrivastine	-	M+K-2H	C22H24N2O2	1.2607	neg	Benzene and substituted derivatives	385.133	2.74532
4-(METHYLNITROSAMINO)-1-(3-PYRIDYL-N-OXIDE)-1-BUTANOL	-	M+FA-H	C10H15N3O3	1.2684	neg	-	270.109	-4.43144
Beta-Gastrodin	-	M-H	C13H18O7	1.2684	neg	-	285.097	-3.83334
Solerol	-	M-H2O-H	C6H10O4	1.3068	neg	Lactones	127.039	-8.83414
Imidazoleacetic acid ribotide	Histidine metabolism	M+K-2H	C10H15N2O9P	1.3068	neg	Organooxygen compounds	375.001	2.92519
Guanosine diphosphate mannose	Metabolic pathways;Biosynthesis of secondary metabolites;Amino sugar and nucleotide sugar metabolism;Fructose and mannose metabolism;Ascorbate and aldarate metabolism;N-Glycan biosynthesis	M-H	C16H25N5O16P2	1.3068	neg	Purine nucleotides	604.071	2.13578
6-(alpha-D-glucosaminyl)-1D-myo-inositol	-	M-H	C12H23NO10	1.3145	neg	Organooxygen compounds	340.125	-0.99528
2-Keto-6-acetamidocaproate	Lysine degradation	M-H	C8H13NO4	1.3298	neg	Keto acids and derivatives	186.076	-6.12684
Phenylalanyl-Glutamine	-	M-H	C14H19N3O4	1.3298	neg	Carboxylic acids and derivatives	292.13	-1.94727
Coumeroic acid	-	M+K-2H	C17H14N2O7	1.3375	neg	-	395.027	-4.72556
4-Vinylphenol sulfate	-	M+FA-H	C8H8O4S	1.3452	neg	Organic sulfuric acids and derivatives	245.011	-5.74493
Pyrogallol-2-O-glucuronide	-	M-H	C12H14O9	1.3534	neg	Organooxygen compounds	301.056	-2.59621
Cis-4-Decenedioic acid	-	M+FA-H	C10H16O4	1.3611	neg	Fatty Acyls	245.102	-4.86239
Cysteinyl-Tyrosine	-	2M-H	C12H16N2O4S	1.3687	neg	Carboxylic acids and derivatives	567.155	-7.52177
2-Hepteneoylglycine	-	M+FA-H	C9H15NO3	1.3763	neg	Carboxylic acids and derivatives	230.102	-6.18476
Buformin	-	M+K-2H	C6H15N5	1.4222	neg	-	194.081	-1.35215
1-Ipomeanol	-	M+FA-H	C9H12O3	1.4222	neg	Heteroaromatic compounds	213.076	-6.79922
5-Phenyl-1,3-oxazinane-2,4-dione	-	M+FA-H	C10H9NO3	1.4222	neg	Benzene and substituted derivatives	236.055	-5.80291
N-Sulfo-D-glucosamine	-	2M-H	C6H13NO8S	1.4222	neg	Organooxygen compounds	517.067	3.19254
N-lactoyl-Phenylalanine	-	M-H	C12H15NO4	1.4299	neg	Carboxylic acids and derivatives	236.091	-6.13411
3-(3,4,5-trihydroxyphenyl)propanoic acid	-	M+FA-H	C9H10O5	1.4299	neg	Phenylpropanoic acids	243.05	-5.56086
2-n-Propyl-4-oxopentanoic acid	-	M+Na-2H	C8H14O3	1.4376	neg	Keto acids and derivatives	179.07	7.14855
{[3,4,5-trihydroxy-5-(hydroxymethyl)oxolan-2-yl]methoxy}sulfonic acid	-	M-H2O-H	C6H12O9S	1.4453	neg	Organooxygen compounds	241.001	-4.07178
Cyclodopa glucoside	-	M-H2O-H	C15H19NO9	1.4607	neg	Organooxygen compounds	338.087	-3.41408
Aminofructose 6-phosphate	-	2M-H	C6H14NO8P	1.4607	neg	Organooxygen compounds	517.085	1.53392
5-Methoxysalicylic acid	-	M-H	C8H8O4	1.4992	neg	Benzene and substituted derivatives	167.034	-7.4959
Cis-5-Caffeoylquinic acid	-	M-2H	C16H18O9	1.4992	neg	Organooxygen compounds	176.039	-7.52377
5-Fluoromuconolactone	-	M+FA-H	C6H5FO4	1.4992	neg	Dihydrofurans	205.017	7.81935
Glutathione	Metabolic pathways;Cysteine and methionine metabolism;Glutathione metabolism;ABC transporters	M-H	C10H17N3O6S	1.4992	neg	Carboxylic acids and derivatives	306.075	-3.85684
3,4,5-trihydroxy-6-[(2-phenylacetyl)oxy]oxane-2-carboxylic acid	-	M-H	C14H16O8	1.5068	neg	Organooxygen compounds	311.076	-3.82855
Sumiki's acid	-	M+FA-H	C6H6O4	1.5224	neg	Furans	187.024	-8.65523
Cis-4-Hydroxycyclohexylacetic acid	-	M-H	C8H14O3	1.53	neg	Organooxygen compounds	157.086	-8.04461
Gentisic acid	Metabolic pathways;Tyrosine metabolism	M-H	C7H6O4	1.5529	neg	Benzene and substituted derivatives	153.018	-8.47457
6-(5-ethyl-2,3-dihydroxyphenoxy)-3,4,5-trihydroxyoxane-2-carboxylic acid	-	M+FA-H	C14H18O9	1.5529	neg	Organooxygen compounds	375.092	-4.88226
(2S)-2-Butanol O-[b-D-Apiofuranosyl-(1->6)-b-D-glucopyranoside]	-	M-H2O-H	C15H28O10	1.5605	neg	Organooxygen compounds	349.149	-4.72583
16,17-Dihydro-16a,17-dihydroxygibberellin A7 17-glucoside	-	M+FA-H	C25H34O12	1.5605	neg	Prenol lipids	571.201	-3.7996
Crosatoside B	-	M+FA-H	C20H30O11	1.5911	neg	Organooxygen compounds	491.175	-3.96717
1-Methylguanosine	-	2M-H	C11H15N5O5	1.5987	neg	Purine nucleosides	593.206	-2.00979
(5-ethenyl-2-hydroxyphenyl)oxidanesulfonic acid	-	M+FA-H	C8H8O5S	1.6139	neg	Organic sulfuric acids and derivatives	261.006	-5.11002
ISOPEONOL	-	M-H	C9H10O3	1.6291	neg	-	165.054	-7.68383
Saccharopine	Metabolic pathways;Lysine degradation;Biosynthesis of secondary metabolites;Lysine biosynthesis;Biosynthesis of amino acids	M-H	C11H20N2O6	1.6291	neg	Carboxylic acids and derivatives	275.124	-4.1193
Boldione	Metabolic pathways	M+Na-2H	C19H24O2	1.6595	neg	Steroids and steroid derivatives	305.152	-0.075517
Val-Phe4Cl-OH	-	M-H	C19H19ClN2O6	1.6595	neg	-	405.085	-2.48632
Prenyl apiosyl-(1->6)-glucoside	-	M+Na-2H	C16H28O10	1.6672	neg	Fatty Acyls	401.143	1.44552
Diphenylphosphine Acid	-	M-H	C17H19O3P	1.6748	neg	-	301.103	9.49627
Nonate	-	M+FA-H	C9H16O4	1.6904	neg	Fatty Acyls	233.102	-6.06745
(4-ethyl-2,6-dihydroxyphenyl)oxidanesulfonic acid	-	2M-H	C8H10O6S	1.6904	neg	Organic sulfuric acids and derivatives	467.031	-3.90121
(2E)-3-(2,4-dihydroxy-5-methoxyphenyl)prop-2-enoic acid	-	M+FA-H	C10H10O5	1.6981	neg	Cinnamic acids and derivatives	255.05	-5.14001
Austdiol	-	M+FA-H	C12H12O5	1.7057	neg	Azaphilones	281.066	-4.40901
Hydroxy Ritonavir	-	M+Cl	C37H48N6O6S2	1.721	neg	Hydroxy acids and derivatives	771.28	4.04799
Picrotoxinin	-	2M-H	C15H16O6	1.7363	neg	Furopyrans	583.184	4.04922
XANTHOXYLIN	-	M-H	C10H12O4	1.744	neg	Organooxygen compounds	195.065	-6.36434
3-(3,4-dihydroxyphenyl)-2-oxopropanoic acid	-	M-H	C9H8O5	1.7669	neg	Benzene and substituted derivatives	195.029	-6.15187
P-CHLOROPHENYLALANINE	-	M-H	C9H10ClNO2	1.7669	neg	-	198.031	-6.2557
Ecgonine	Tropane, piperidine and pyridine alkaloid biosynthesis	M+FA-H	C9H15NO3	1.7669	neg	Tropane alkaloids	230.102	-6.17011
Tyramine glucuronide	Metabolic pathways;Pentose and glucuronate interconversions	M-H	C14H19NO7	1.7669	neg	Organooxygen compounds	312.108	-3.53403
Ipolamiide	-	M+FA-H	C17H26O11	1.7896	neg	-	451.144	-4.73211
3-Acetyl-4-hydroxy-6-methyl-2H-pyran-2-one	-	M+FA-H	C8H8O4	1.8048	neg	Organooxygen compounds	213.039	-7.02736
Asparaginyl-Glutamic acid	-	2M+FA-H	C9H15N3O6	1.8048	neg	Carboxylic acids and derivatives	567.19	-0.0175932
2-Phenylethanol glucuronide	Metabolic pathways;Pentose and glucuronate interconversions	M-H2O-H	C14H18O7	1.8276	neg	Organooxygen compounds	279.09	7.95819
Glucosamine 6-sulfate	-	2M-H	C6H13NO8S	1.8353	neg	Organooxygen compounds	517.067	3.70562
3-amino-2-naphthoic acid	-	M-H	C11H9NO2	1.8511	neg	-	186.055	-6.63008
De-O-methylsimmondsin	-	M+Na-2H	C15H23NO9	1.874	neg	Organooxygen compounds	382.113	2.21391
1-(4-methoxy-1-benzofuran-5-yl)ethan-1-one	-	M-H	C11H10O3	1.8817	neg	Benzofurans	189.055	-6.36526
(R)-Apiumetin	-	2M+FA-H	C14H12O4	1.897	neg	Coumarins and derivatives	533.147	4.23279
3,4-Dihydroxyphenyl ethanol	-	M-H	C8H10O3	1.9201	neg	-	153.054	-8.42948
3,4-Dihydroxyphenylacetaldehyde	Isoquinoline alkaloid biosynthesis;Metabolic pathways;Biosynthesis of secondary metabolites;Tyrosine metabolism	M-H2O-H	C8H8O3	1.9427	neg	Benzene and substituted derivatives	133.028	-8.88002
5-Fluorodeoxyuridine monophosphate	-	M+Na-2H	C9H12FN2O8P	1.9427	neg	Pyrimidine nucleotides	347.006	0.128174
Cinoxate	-	M+Na-2H	C14H18O4	1.9649	neg	-	271.096	4.20196
Melleolide	-	M+Na-2H	C23H28O6	2.0028	neg	Prenol lipids	421.159	-9.67068
2-Hydroxycinnamic acid	Phenylpropanoid biosynthesis;Biosynthesis of secondary metabolites;Phenylalanine metabolism	M-H	C9H8O3	2.0104	neg	Cinnamic acids and derivatives	163.039	-7.92536
Caffeic acid 3-sulfate	-	M-H	C9H8O7S	2.018	neg	Cinnamic acids and derivatives	258.991	-4.35769
Deoxynivalenol 3-glucoside	-	M+FA-H	C21H30O11	2.0334	neg	Prenol lipids	503.175	-4.52317
Troxerutin	-	M+FA-H	C33H42O19	2.0411	neg	Flavonoids	787.228	-3.58344
{[3-(2-hydroxyphenyl)prop-2-en-1-yl]oxy}sulfonic acid	-	M+FA-H	C9H10O5S	2.0718	neg	Benzene and substituted derivatives	275.022	-3.98944
(5S,6S)-5-[(1-Carboxyvinyl)oxy]-6-hydroxy-1,3-cyclohexadiene-1-carboxylic acid	-	M-H	C10H10O6	2.0795	neg	-	225.039	-4.885
1-O-(indol-3-ylacetyl)-beta-D-glucose	-	M+FA-H	C16H19NO7	2.0795	neg	-	382.113	-4.58476
Aniracetam	-	M+FA-H	C12H13NO3	2.0871	neg	-	264.087	-4.28823
Propyl 2-furoate	-	M+Na-2H	C8H10O3	2.0948	neg	Furans	175.039	7.963
3-[3-methoxy-4-(sulfooxy)phenyl]-2-oxopropanoic acid	-	M-H	C10H10O8S	2.1413	neg	Benzene and substituted derivatives	289.001	-3.2092
Kanokoside D	-	M+FA-H	C27H44O16	2.1489	neg	Prenol lipids	669.259	-3.75214
Suberylglycine	-	M-H	C10H17NO5	2.1566	neg	Carboxylic acids and derivatives	230.102	-5.13341
Diphenol glucuronide	-	M-H	C12H14O8	2.1642	neg	Organooxygen compounds	285.06	-3.90243
4-hydroxy-5-(3-methoxyphenyl)pentanoic acid	-	M+FA-H	C12H16O4	2.1718	neg	Hydroxy acids and derivatives	269.105	8.58311
Betamethasone	-	M-H	C22H29FO5	2.1794	neg	Steroids and steroid derivatives	391.196	8.06846
B-D-fructosyl-a-D-(6-O-(E))-feruloylglucoside	-	M+FA-H	C21H28O12	2.1794	neg	Cinnamic acids and derivatives	517.154	-5.13682
Puddumin A	-	M+FA-H	C22H24O10	2.1946	neg	Flavonoids	493.134	-2.49272
4'-O-Methyl-(-)-epicatechin 3'-O-glucuronide	-	M+FA-H	C22H24O12	2.1946	neg	Flavonoids	525.123	-4.77563
N-Phenyl-1-naphthalenamine	-	2M+FA-H	C16H13N	2.2402	neg	-	483.206	-3.3799
Valproic acid glucuronide	-	M-H	C14H24O8	2.2555	neg	Organooxygen compounds	319.138	-4.42135
(1S,2R,4R,8S)-p-Menthane-2,8,9-triol 2-glucoside	-	M+FA-H	C16H30O8	2.2555	neg	Prenol lipids	395.191	-4.9881
2-[4-(3-Hydroxypropyl)-2-methoxyphenoxy]-1,3-propanediol 1-glucoside	-	M+FA-H	C19H30O10	2.3166	neg	Organooxygen compounds	463.18	-3.91611
N-Salicyloylaspartic acid	-	M-H	C11H11NO6	2.3478	neg	Carboxylic acids and derivatives	252.05	-4.29714
Limocitrol 3-glucoside	-	M+FA-H	C24H26O14	2.4015	neg	Flavonoids	583.128	-4.02064
Methyl (R)-9-hydroxy-10-undecene-5,7-diynoate glucoside	-	M+FA-H	C18H24O8	2.4091	neg	Fatty Acyls	413.146	1.14604
Chenodeoxycholic acid disulfate	-	M+FA-H	C24H40O10S2	2.4091	neg	Steroids and steroid derivatives	597.201	-6.41505
5-Hydroxyindoleacetaldehyde	Metabolic pathways;Tryptophan metabolism	M+FA-H	C10H9NO2	2.4244	neg	Indoles and derivatives	220.06	-6.42088
Natamycin	-	M+K-2H	C33H47NO13	2.4244	neg	Organooxygen compounds	702.248	-7.29086
Peperinic acid	-	M+FA-H	C10H14O3	2.4321	neg	Benzofurans	227.091	-6.51188
L-N-(1H-Indol-3-ylacetyl)glutamic acid	-	2M+FA-H	C15H16N2O5	2.4321	neg	Carboxylic acids and derivatives	653.207	-5.77587
2'',6''-Diacetylorientin	-	M-H	C25H24O13	2.4397	neg	Flavonoids	531.112	-4.07846
Caffeic acid hexoside	-	M+Cl	C15H18O9	2.4702	neg	-	377.063	-4.11937
5-[2H-Pyrrol-4-(3H)-ylidenemethyl]-2-furanmethanol	-	M+FA-H	C10H11NO2	2.4778	neg	Heteroaromatic compounds	222.076	-6.93419
Butyl (S)-3-hydroxybutyrate glucoside	-	M-H	C14H26O8	2.4778	neg	Fatty Acyls	321.154	-4.52414
3,4,5-trihydroxy-6-[3-(2-phenylcyclobutyl)phenoxy]oxane-2-carboxylic acid	-	M-H2O-H	C22H24O7	2.4778	neg	Stilbenes	381.138	9.60864
Glycosminine	-	2M+FA-H	C15H12N2O	2.4931	neg	Diazanaphthalenes	517.19	4.28684
Taxiphyllin	-	M-H	C14H17NO7	2.5008	neg	Organooxygen compounds	310.092	-4.06221
Leonoside A	-	M+FA-H	C35H46O19	2.5008	neg	Organooxygen compounds	815.258	-4.1792
Zingerone glucoside	-	M-H	C17H24O8	2.5085	neg	Organooxygen compounds	355.139	-2.23869
3'',4''-Diacetylcosmosiin	-	M-H	C25H24O12	2.5085	neg	Flavonoids	515.117	-4.06455
ACETOSYRINGONE	-	M-H	C10H12O4	2.5245	neg	-	195.065	-6.36488
Pyridostigmine	-	M+K-2H	C9H13N2O2+	2.5245	neg	Pyridines and derivatives	218.045	-8.75007
Cinncassiol A 19-glucoside	-	M+FA-H	C26H40O12	2.5399	neg	Prenol lipids	589.248	-4.27905
1-O-p-Coumaroyl-beta-D-glucose	-	2M-H	C15H18O8	2.5628	neg	Cinnamic acids and derivatives	651.19	-4.78303
Ustiloxin D	-	M+FA-H	C23H34N4O8	2.5704	neg	Carboxylic acids and derivatives	539.232	-7.11048
N-[(1S)-1-Carboxy-2-methylpropyl]-D-glutamic acid	-	M-H	C10H17NO6	2.6008	neg	-	246.097	-4.67965
N-lactoyl-Leucine	-	M-H2O-H	C9H17NO4	2.6084	neg	Carboxylic acids and derivatives	184.097	-5.77963
20-Hydroxy-leukotriene E4	Arachidonic acid metabolism	M-H2O-H	C23H37NO6S	2.6084	neg	Fatty Acyls	436.217	0.669252
Taraxacoside	-	2M+FA-H	C18H22O10	2.6314	neg	Organooxygen compounds	841.237	-4.90528
Kiwiionoside	-	M+FA-H	C19H34O9	2.6391	neg	Prenol lipids	451.217	-4.50713
[truncated: 1,211 more rows]
